# Supplementary material for: Design, Semisynthesis, Insecticidal and Antibacterial Activities of a Series of Marine-Derived Geodin Derivatives and Their Preliminary Structure–Activity Relationships
Source: MDPI journal article supplement (doi:10.3390/md20020082), 2022-01-18
Supplement: s1 [file s1]

## SUPPLEMENTARY MATERIAL

# Design, Semisynthesis, Insecticidal and Antibacterial Activities of a Series of Marine-Derived Geodin Derivatives and Their Preliminary Structure-Activity Relationships

Rong Chao <sup>1,†</sup>, Gulab Said <sup>1,5,†</sup>, Qun Zhang <sup>1</sup>, Yue-Xuan Qi <sup>2</sup>, Jie Hu <sup>1,2</sup>, Cai-Juan Zheng <sup>3</sup>, Ji-Yong Zheng <sup>2,\*</sup>, Chang-Lun Shao <sup>1,2</sup>, Guang-Ying Chen <sup>3</sup>, and Mei-Yan Wei <sup>1,4,\*</sup>

<sup>1</sup> Key Laboratory of Marine Drugs, The Ministry of Education of China, School of Medicine and Pharmacy, Ocean University of China, Qingdao 266003, China; chaorong1122@163.com (R.C.); gulabouc@gmail.com (G.S.); zhangqunnn@163.com (Q.Z.); hujiewrc@163.com (J.H.); shaochangelun@163.com (C.-L.S.); mywei95@126.com (M.-Y.W.)

<sup>2</sup> State Key Laboratory for Marine Corrosion and Protection, Luoyang Ship Material Research Institute (LSMRI), Qingdao 266061, China; qiyuexuan9475@163.com (Y.-X.Q.); zhengjy@sunrui.net (J.-Y.Z)

<sup>3</sup> Key Laboratory of Tropical Medicinal Resource Chemistry of Ministry of Education, Hainan Normal University, Haikou 570100, China; caijuan2002@163.com (C.-J.Z); chgying123@163.com (G.-Y.C)

<sup>4</sup> College of Food Science and Engineering, Ocean University of China, Qingdao 266003, People's Republic of China

<sup>5</sup> Department of Chemistry, Women University Swabi, Swabi 23430, Khyber Pakhtunkhwa, Pakistan.

\* Correspondence: mywei95@126.com (M.-Y.W.); zhengjy@sunrui.net (J.-Y.Z); Tel: +86-532-8203-1381 (M.-Y.W.); +86-532-68725022 (J.-Y.Z)

† These authors contributed equally to this work.

**Figure S1.**  $^1\text{H}$  NMR (500 MHz,  $\text{CDCl}_3$ ) spectrum of compound 1  
**Figure S2.**  $^{13}\text{C}$  NMR (125 MHz,  $\text{CDCl}_3$ ) spectrum of compound 1  
**Figure S3.** ESIMS spectrum of compound 1  
**Figure S4.**  $^1\text{H}$  NMR (500 MHz,  $\text{CDCl}_3$ ) spectrum of compound 2  
**Figure S5.**  $^{13}\text{C}$  NMR (125 MHz,  $\text{CDCl}_3$ ) spectrum of compound 2  
**Figure S6.** HRESIMS spectrum of compound 2  
**Figure S7.**  $^1\text{H}$  NMR (500 MHz,  $\text{CDCl}_3$ ) spectrum of compound 3  
**Figure S8.**  $^{13}\text{C}$  NMR (125 MHz,  $\text{CDCl}_3$ ) spectrum of compound 3  
**Figure S9.** HRESIMS spectrum of compound 3  
**Figure S10.**  $^1\text{H}$  NMR (500 MHz,  $\text{CDCl}_3$ ) spectrum of compound 4  
**Figure S11.**  $^{13}\text{C}$  NMR (125 MHz,  $\text{CDCl}_3$ ) spectrum of compound 4  
**Figure S12.** HRESIMS spectrum of compound 4  
**Figure S13.**  $^1\text{H}$  NMR (500 MHz,  $\text{CDCl}_3$ ) spectrum of compound 5  
**Figure S14.**  $^{13}\text{C}$  NMR (125 MHz,  $\text{CDCl}_3$ ) spectrum of compound 5  
**Figure S15.** HRESIMS spectrum of compound 5  
**Figure S16.**  $^1\text{H}$  NMR (500 MHz,  $\text{CDCl}_3$ ) spectrum of compound 6  
**Figure S17.**  $^{13}\text{C}$  NMR (125 MHz,  $\text{CDCl}_3$ ) spectrum of compound 6  
**Figure S18.** HRESIMS spectrum of compound 6  
**Figure S19.**  $^1\text{H}$  NMR (500 MHz,  $\text{CDCl}_3$ ) spectrum of compound 7  
**Figure S20.**  $^{13}\text{C}$  NMR (125 MHz,  $\text{CDCl}_3$ ) spectrum of compound 7  
**Figure S21.** HRESIMS spectrum of compound 7  
**Figure S22.**  $^1\text{H}$  NMR (500 MHz,  $\text{CDCl}_3$ ) spectrum of compound 8  
**Figure S23.**  $^{13}\text{C}$  NMR (125 MHz,  $\text{CDCl}_3$ ) spectrum of compound 8  
**Figure S24.** HRESIMS spectrum of compound 8  
**Figure S25.**  $^1\text{H}$  NMR (500 MHz,  $\text{CDCl}_3$ ) spectrum of compound 9  
**Figure S26.**  $^{13}\text{C}$  NMR (125 MHz,  $\text{CDCl}_3$ ) spectrum of compound 9  
**Figure S27.** HRESIMS spectrum of compound 9  
**Figure S28.**  $^1\text{H}$  NMR (500 MHz,  $\text{CDCl}_3$ ) spectrum of compound 10  
**Figure S29.**  $^{13}\text{C}$  NMR (125 MHz,  $\text{CDCl}_3$ ) spectrum of compound 10  
**Figure S30.** HRESIMS spectrum of compound 10  
**Figure S31.**  $^1\text{H}$  NMR (500 MHz,  $\text{CDCl}_3$ ) spectrum of compound 11  
**Figure S32.**  $^{13}\text{C}$  NMR (125 MHz,  $\text{CDCl}_3$ ) spectrum of compound 11  
**Figure S33.** HRESIMS spectrum of compound 11  
**Figure S34.**  $^1\text{H}$  NMR (500 MHz,  $\text{CDCl}_3$ ) spectrum of compound 12  
**Figure S35.**  $^{13}\text{C}$  NMR (125 MHz,  $\text{CDCl}_3$ ) spectrum of compound 12  
**Figure S36.** HRESIMS spectrum of compound 12  
**Figure S37.**  $^1\text{H}$  NMR (500 MHz,  $\text{CDCl}_3$ ) spectrum of compound 13  
**Figure S38.**  $^{13}\text{C}$  NMR (125 MHz,  $\text{CDCl}_3$ ) spectrum of compound 13  
**Figure S39.** HRESIMS spectrum of compound 13  
**Figure S40.**  $^1\text{H}$  NMR (500 MHz,  $\text{CDCl}_3$ ) spectrum of compound 14  
**Figure S41.**  $^{13}\text{C}$  NMR (125 MHz,  $\text{CDCl}_3$ ) spectrum of compound 14  
**Figure S42.** HRESIMS spectrum of compound 14  
**Figure S43.**  $^1\text{H}$  NMR (500 MHz,  $\text{CDCl}_3$ ) spectrum of compound 15  
**Figure S44.**  $^{13}\text{C}$  NMR (125 MHz,  $\text{CDCl}_3$ ) spectrum of compound 15  
**Figure S45.** HRESIMS spectrum of compound 15

**Figure S46.**  $^1\text{H}$  NMR (500 MHz,  $\text{CDCl}_3$ ) spectrum of compound 16  
**Figure S47.**  $^{13}\text{C}$  NMR (125 MHz,  $\text{CDCl}_3$ ) spectrum of compound 16  
**Figure S48.** HRESIMS spectrum of compound 16  
**Figure S49.**  $^1\text{H}$  NMR (500 MHz,  $\text{CDCl}_3$ ) spectrum of compound 17  
**Figure S50.**  $^{13}\text{C}$  NMR (125 MHz,  $\text{CDCl}_3$ ) spectrum of compound 17  
**Figure S51.** HRESIMS spectrum of compound 17  
**Figure S52.**  $^1\text{H}$  NMR (500 MHz,  $\text{CDCl}_3$ ) spectrum of compound 18  
**Figure S53.**  $^{13}\text{C}$  NMR (125 MHz,  $\text{CDCl}_3$ ) spectrum of compound 18  
**Figure S54.** HRESIMS spectrum of compound 18  
**Figure S55.**  $^1\text{H}$  NMR (500 MHz,  $\text{CDCl}_3$ ) spectrum of compound 19  
**Figure S56.**  $^{13}\text{C}$  NMR (125 MHz,  $\text{CDCl}_3$ ) spectrum of compound 19  
**Figure S57.** HRESIMS spectrum of compound 19  
**Figure S58.**  $^1\text{H}$  NMR (500 MHz,  $\text{CDCl}_3$ ) spectrum of compound 20  
**Figure S59.**  $^{13}\text{C}$  NMR (125 MHz,  $\text{CDCl}_3$ ) spectrum of compound 20  
**Figure S60.** HRESIMS spectrum of compound 20  
**Figure S61.**  $^1\text{H}$  NMR (500 MHz,  $\text{CDCl}_3$ ) spectrum of compound 21  
**Figure S62.**  $^{13}\text{C}$  NMR (125 MHz,  $\text{CDCl}_3$ ) spectrum of compound 21  
**Figure S63.** HRESIMS spectrum of compound 21  
**Figure S64.**  $^1\text{H}$  NMR (500 MHz,  $\text{CDCl}_3$ ) spectrum of compound 22  
**Figure S65.**  $^{13}\text{C}$  NMR (125 MHz,  $\text{CDCl}_3$ ) spectrum of compound 22  
**Figure S66.** HRESIMS spectrum of compound 22  
**Figure S67.**  $^1\text{H}$  NMR (500 MHz,  $\text{CDCl}_3$ ) spectrum of compound 23  
**Figure S68.**  $^{13}\text{C}$  NMR (125 MHz,  $\text{CDCl}_3$ ) spectrum of compound 23  
**Figure S69.** HRESIMS spectrum of compound 23  
**Figure S70.**  $^1\text{H}$  NMR (500 MHz,  $\text{CDCl}_3$ ) spectrum of compound 24  
**Figure S71.**  $^{13}\text{C}$  NMR (125 MHz,  $\text{CDCl}_3$ ) spectrum of compound 24  
**Figure S72.** HRESIMS spectrum of compound 24  
**Figure S73.**  $^1\text{H}$  NMR (500 MHz,  $\text{CDCl}_3$ ) spectrum of compound 25  
**Figure S74.**  $^{13}\text{C}$  NMR (125 MHz,  $\text{CDCl}_3$ ) spectrum of compound 25  
**Figure S75.** HRESIMS spectrum of compound 25  
**Figure S76.**  $^1\text{H}$  NMR (500 MHz,  $\text{CDCl}_3$ ) spectrum of compound 26  
**Figure S77.**  $^{13}\text{C}$  NMR (125 MHz,  $\text{CDCl}_3$ ) spectrum of compound 26  
**Figure S78.** HRESIMS spectrum of compound 26  
**Figure S79.**  $^1\text{H}$  NMR (500 MHz,  $\text{CDCl}_3$ ) spectrum of compound 27  
**Figure S80.**  $^{13}\text{C}$  NMR (125 MHz,  $\text{CDCl}_3$ ) spectrum of compound 27  
**Figure S81.** HRESIMS spectrum of compound 27  
**Figure S82.**  $^1\text{H}$  NMR (500 MHz,  $\text{CDCl}_3$ ) spectrum of compound 28  
**Figure S83.**  $^{13}\text{C}$  NMR (125 MHz,  $\text{CDCl}_3$ ) spectrum of compound 28  
**Figure S84.** HRESIMS spectrum of compound 28  
**Figure S85.**  $^1\text{H}$  NMR (500 MHz,  $\text{CDCl}_3$ ) spectrum of compound 29  
**Figure S86.**  $^{13}\text{C}$  NMR (125 MHz,  $\text{CDCl}_3$ ) spectrum of compound 29  
**Figure S87.** HRESIMS spectrum of compound 29  
**Figure S88.**  $^1\text{H}$  NMR (500 MHz,  $\text{CDCl}_3$ ) spectrum of compound 30  
**Figure S89.**  $^{13}\text{C}$  NMR (125 MHz,  $\text{CDCl}_3$ ) spectrum of compound 30

**Figure S90.** HRESIMS spectrum of compound **30**  
**Figure S91.**  $^1\text{H}$  NMR (500 MHz,  $\text{CDCl}_3$ ) spectrum of compound **31**  
**Figure S92.**  $^{13}\text{C}$  NMR (125 MHz,  $\text{CDCl}_3$ ) spectrum of compound **31**  
**Figure S93.** HRESIMS spectrum of compound **31**  
**Figure S94.**  $^1\text{H}$  NMR (500 MHz,  $\text{CDCl}_3$ ) spectrum of compound **32**  
**Figure S95.**  $^{13}\text{C}$  NMR (125 MHz,  $\text{CDCl}_3$ ) spectrum of compound **32**  
**Figure S96.** HRESIMS spectrum of compound **32**  
**Figure S97.**  $^1\text{H}$  NMR (500 MHz,  $\text{CDCl}_3$ ) spectrum of compound **33**  
**Figure S98.**  $^{13}\text{C}$  NMR (125 MHz,  $\text{CDCl}_3$ ) spectrum of compound **33**  
**Figure S99.** HRESIMS spectrum of compound **33**  
**Figure S100.**  $^1\text{H}$  NMR (500 MHz,  $\text{CDCl}_3$ ) spectrum of compound **34**  
**Figure S101.**  $^{13}\text{C}$  NMR (125 MHz,  $\text{CDCl}_3$ ) spectrum of compound **34**  
**Figure S102.** HRESIMS spectrum of compound **34**  
**Figure S103.**  $^1\text{H}$  NMR (500 MHz,  $\text{CDCl}_3$ ) spectrum of compound **35**  
**Figure S104.**  $^{13}\text{C}$  NMR (125 MHz,  $\text{CDCl}_3$ ) spectrum of compound **35**  
**Figure S105.** HRESIMS spectrum of compound **35**  
**Figure S106.**  $^1\text{H}$  NMR (500 MHz,  $\text{CDCl}_3$ ) spectrum of compound **36**  
**Figure S107.**  $^{13}\text{C}$  NMR (125 MHz,  $\text{CDCl}_3$ ) spectrum of compound **36**  
**Figure S108.** HRESIMS spectrum of compound **36**  
**Figure S109.**  $^1\text{H}$  NMR (500 MHz,  $\text{CDCl}_3$ ) spectrum of compound **37**  
**Figure S110.**  $^{13}\text{C}$  NMR (125 MHz,  $\text{CDCl}_3$ ) spectrum of compound **37**  
**Figure S111.** HRESIMS spectrum of compound **37**  
**Figure S112.** Neighbor-joining phylogenetic tree



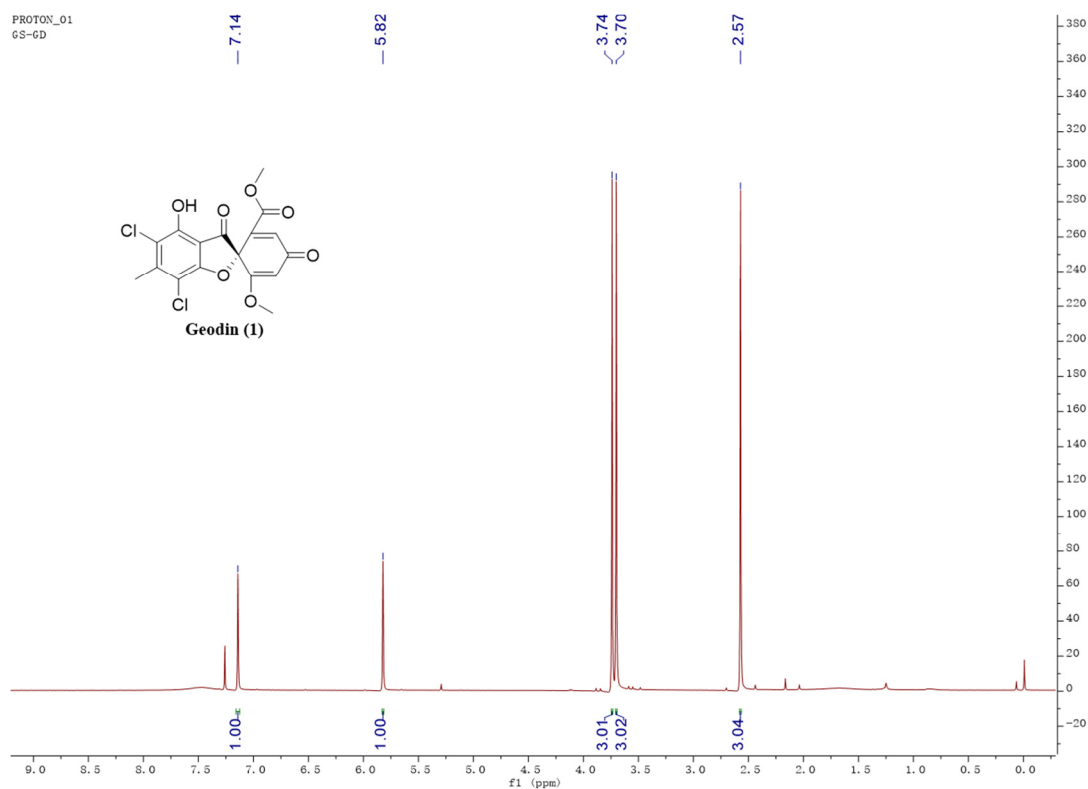

**Figure S1.**  $^1\text{H}$  NMR (500 MHz,  $\text{CDCl}_3$ ) spectrum of compound **1**

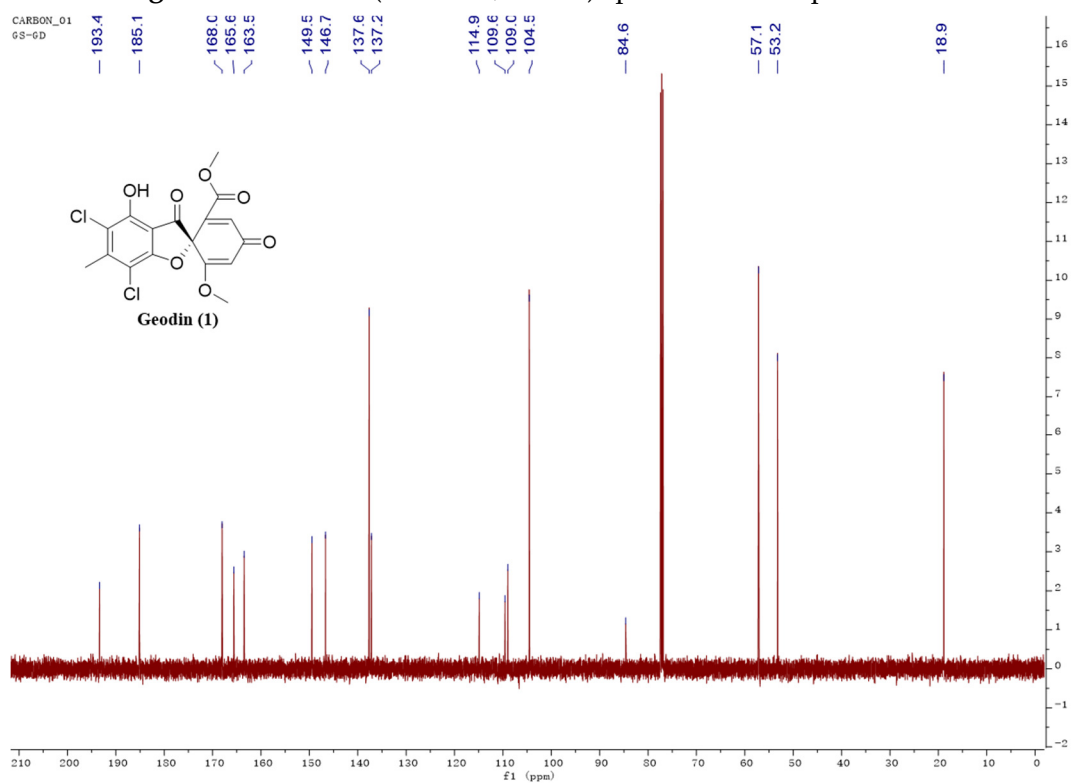

**Figure S2.**  $^{13}\text{C}$  NMR (125 MHz,  $\text{CDCl}_3$ ) spectrum of compound **1**

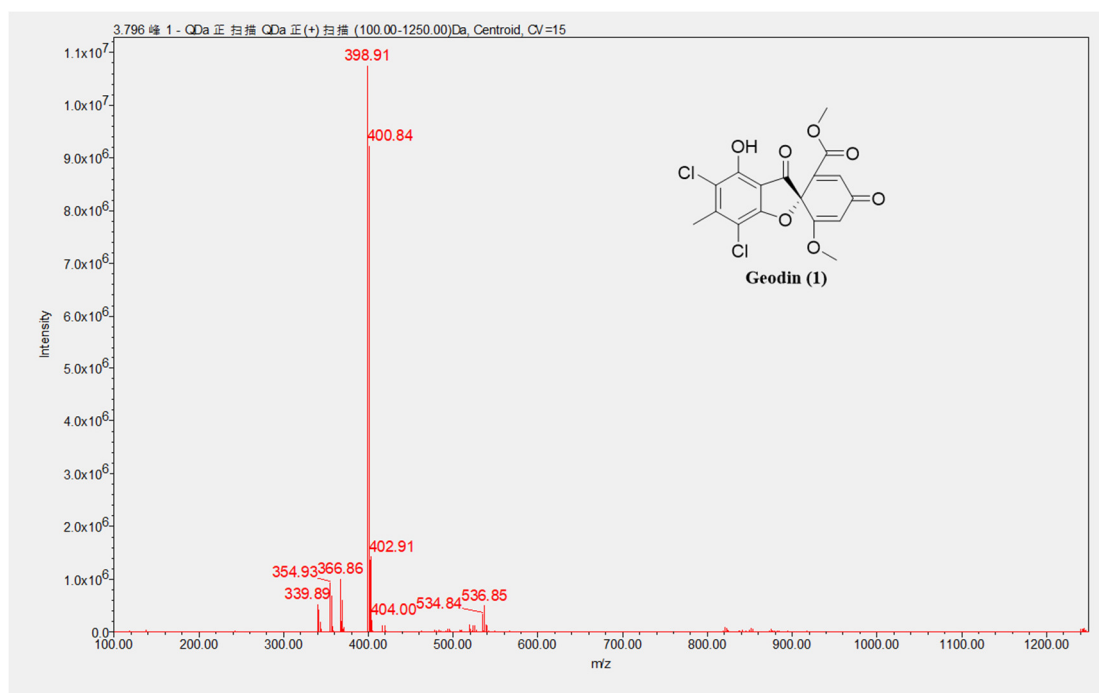

Figure S3. ESIMS spectrum of compound 1.

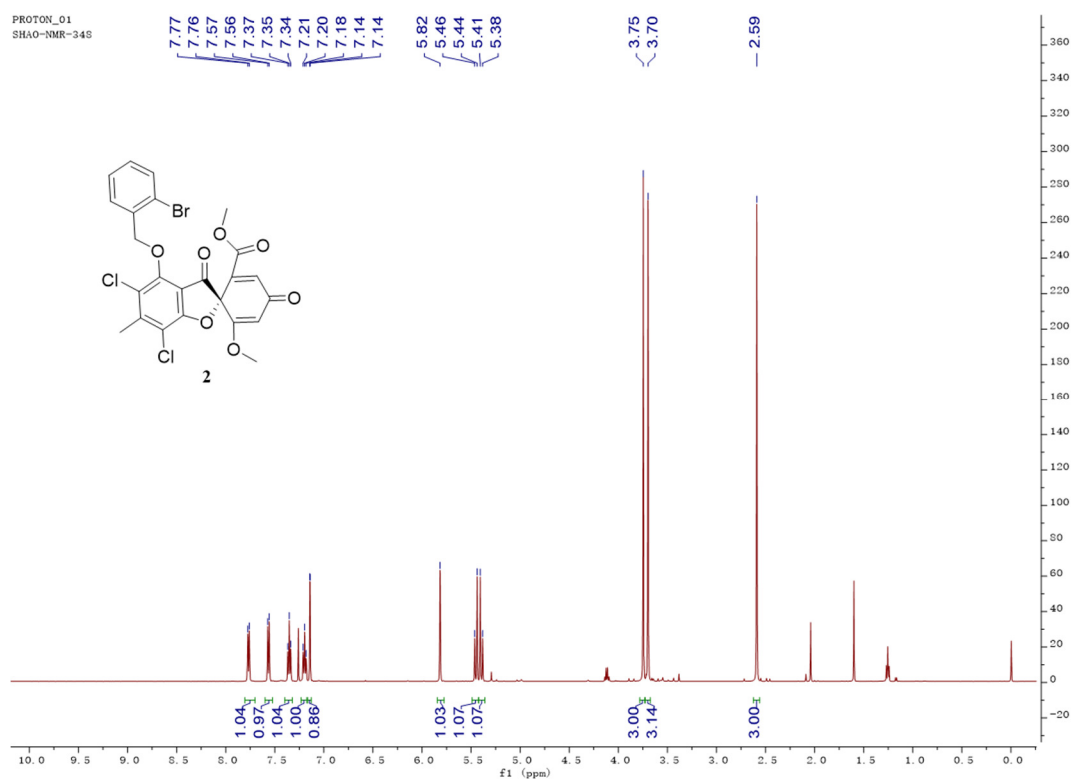

Figure S4.  $^1\text{H}$  NMR (500 MHz,  $\text{CDCl}_3$ ) spectrum of compound 2

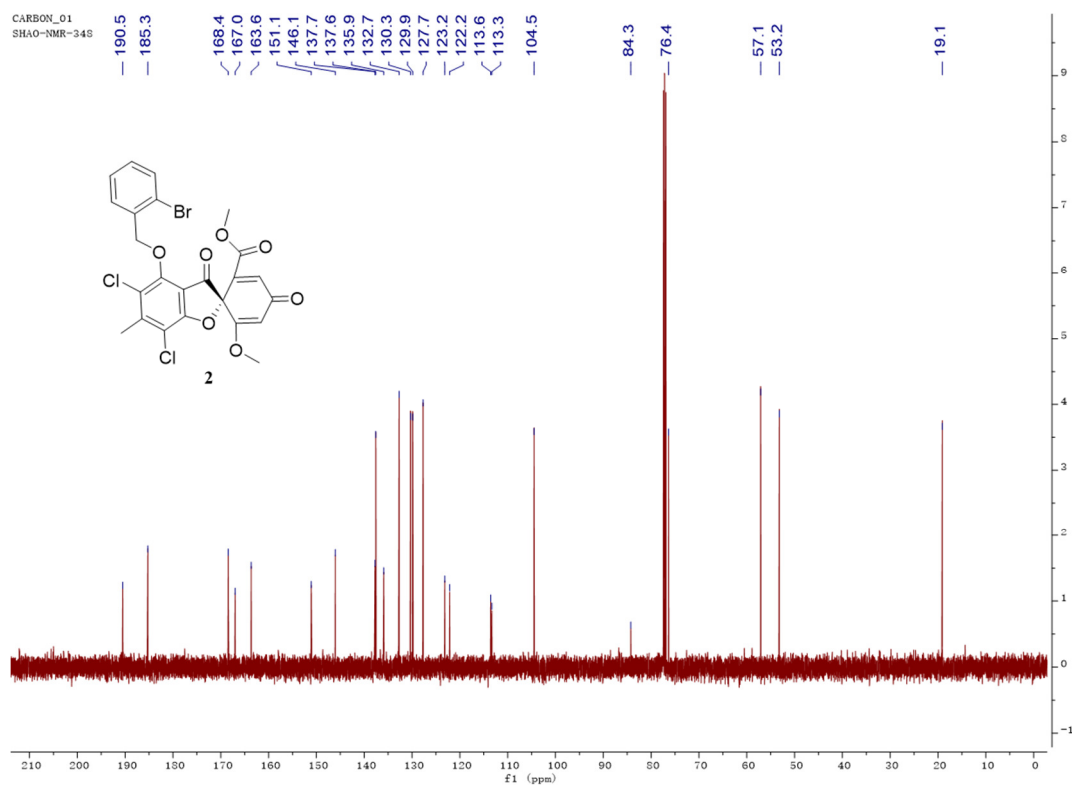

**Figure S5.**  $^{13}\text{C}$  NMR (125 MHz,  $\text{CDCl}_3$ ) spectrum of compound 2

CHNQD-02104 #1-615 RT: 0.00-5.92 AV: 615 NL: 3.54E6  
T: FTMS + p ESI Full ms [100.00-1500.00]

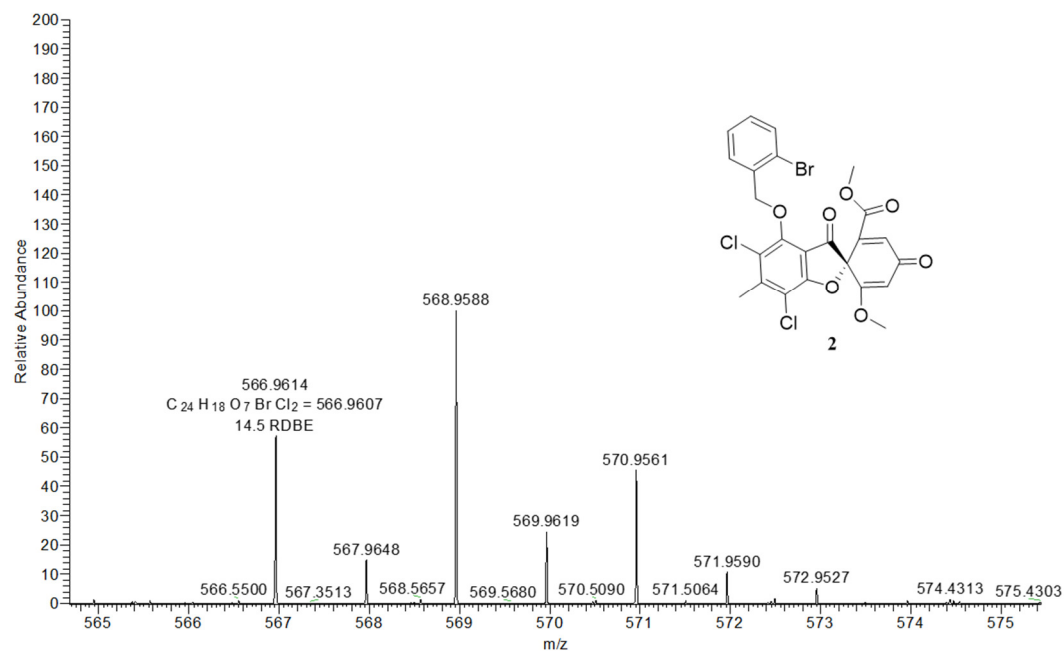

**Figure S6.** HRESIMS spectrum of compound 2

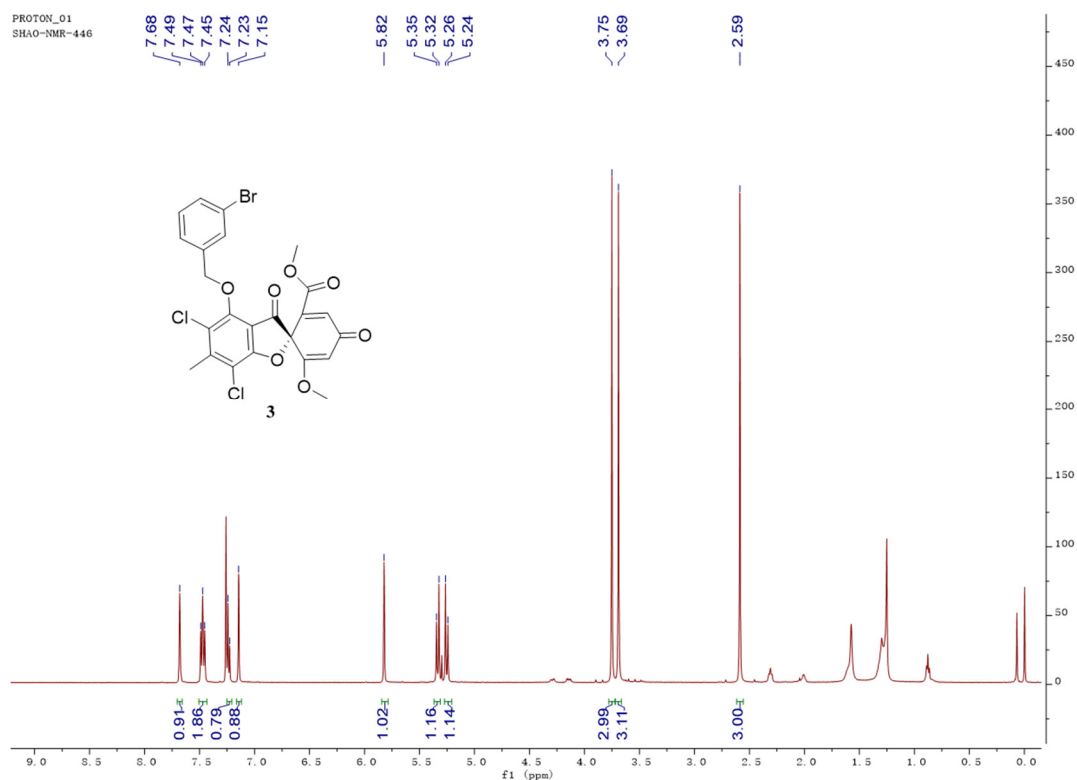

**Figure S7.**  $^1\text{H}$  NMR (500 MHz,  $\text{CDCl}_3$ ) spectrum of compound **3**

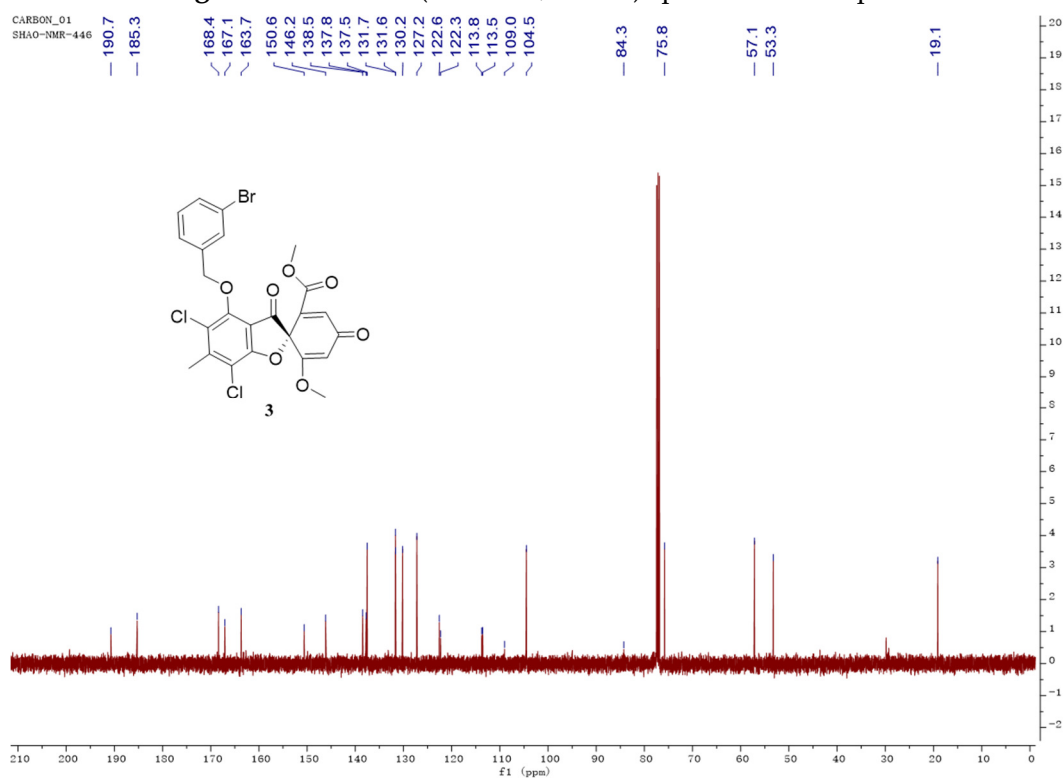

**Figure S8.**  $^{13}\text{C}$  NMR (125 MHz,  $\text{CDCl}_3$ ) spectrum of compound **3**

20201106-CHNQ-02152\_201106083945 #22 RT: 0.59 AV: 1 NL: 5.13E6  
T: FTMS + p ESI Full ms [100.00-2000.00]

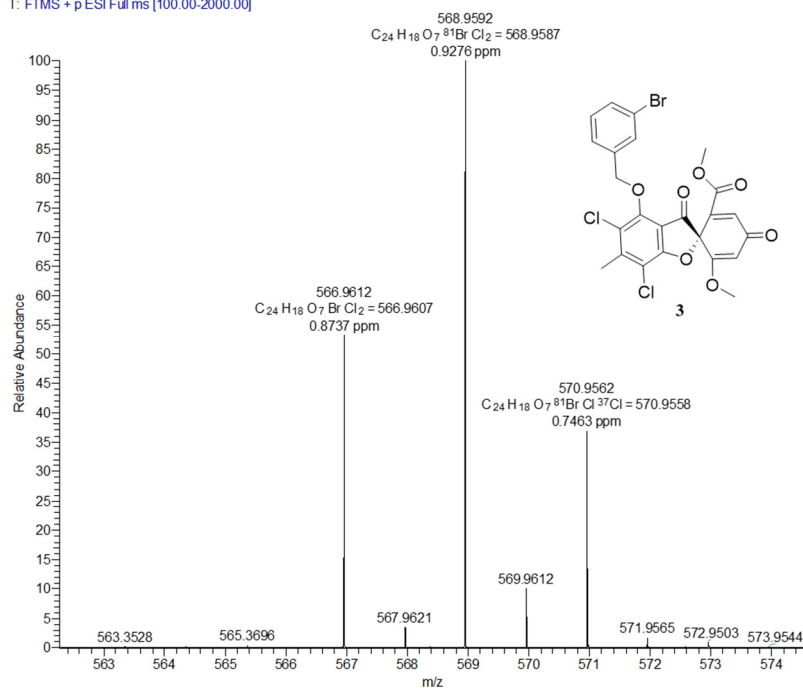

Figure S9. HRESIMS spectrum of compound 3

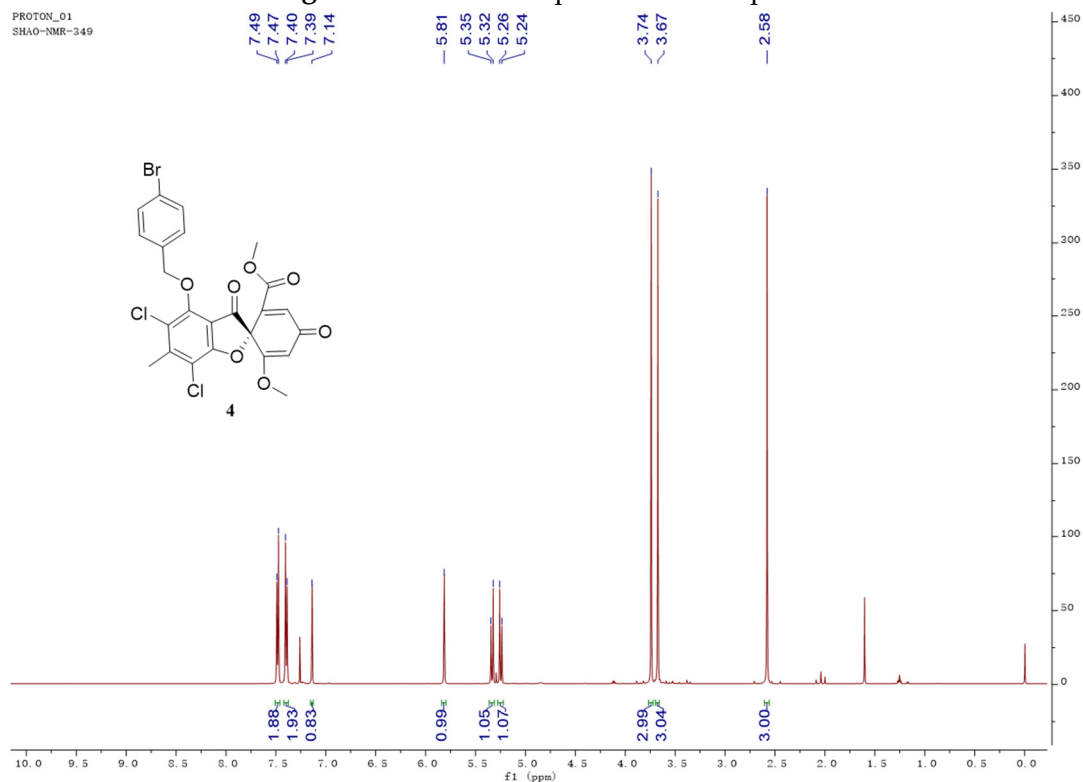

Figure S10.  $^1H$  NMR (500 MHz,  $CDCl_3$ ) spectrum of compound 4

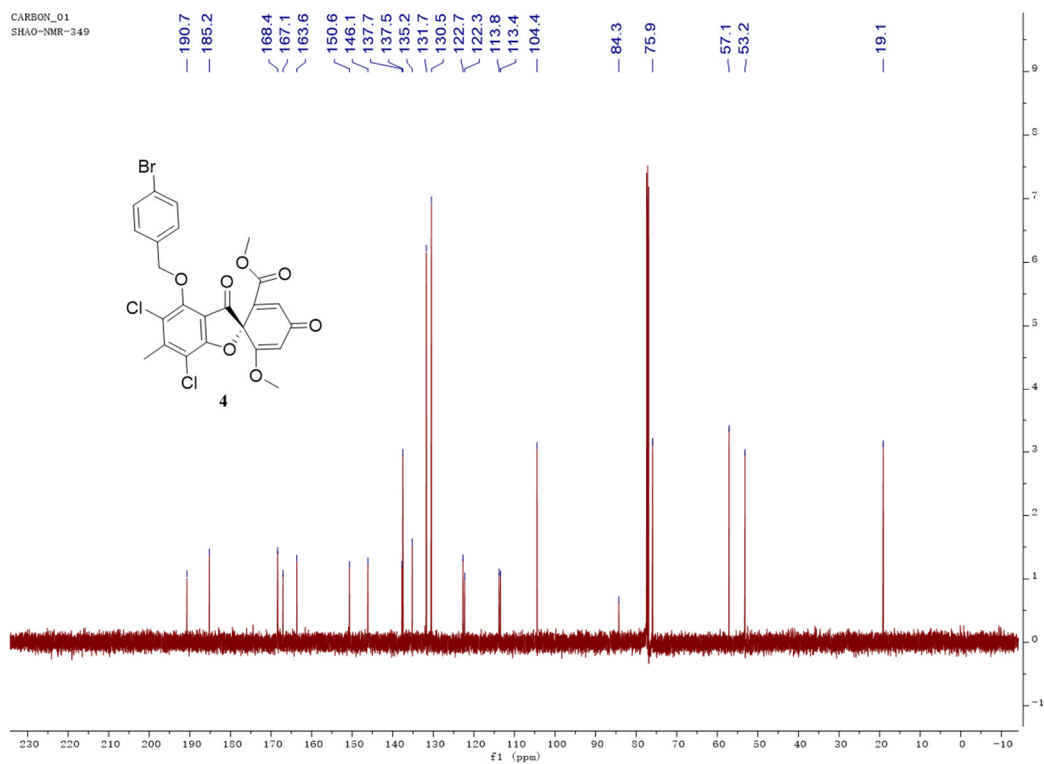

**Figure S11.**  $^{13}\text{C}$  NMR (125 MHz,  $\text{CDCl}_3$ ) spectrum of compound **4**

CHNQD-02105 #1 RT: 0.00 AV: 1 NL: 4.51E4  
T: FTMS + p ESI Full ms [100.00-1500.00]

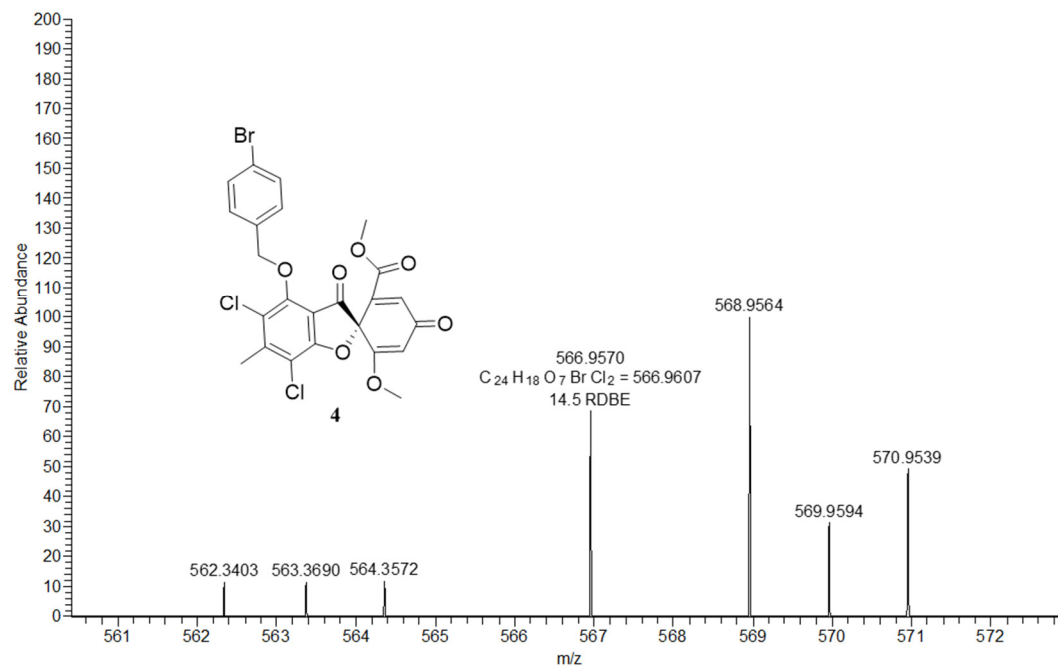

**Figure S12.** HRESIMS spectrum of compound **4**

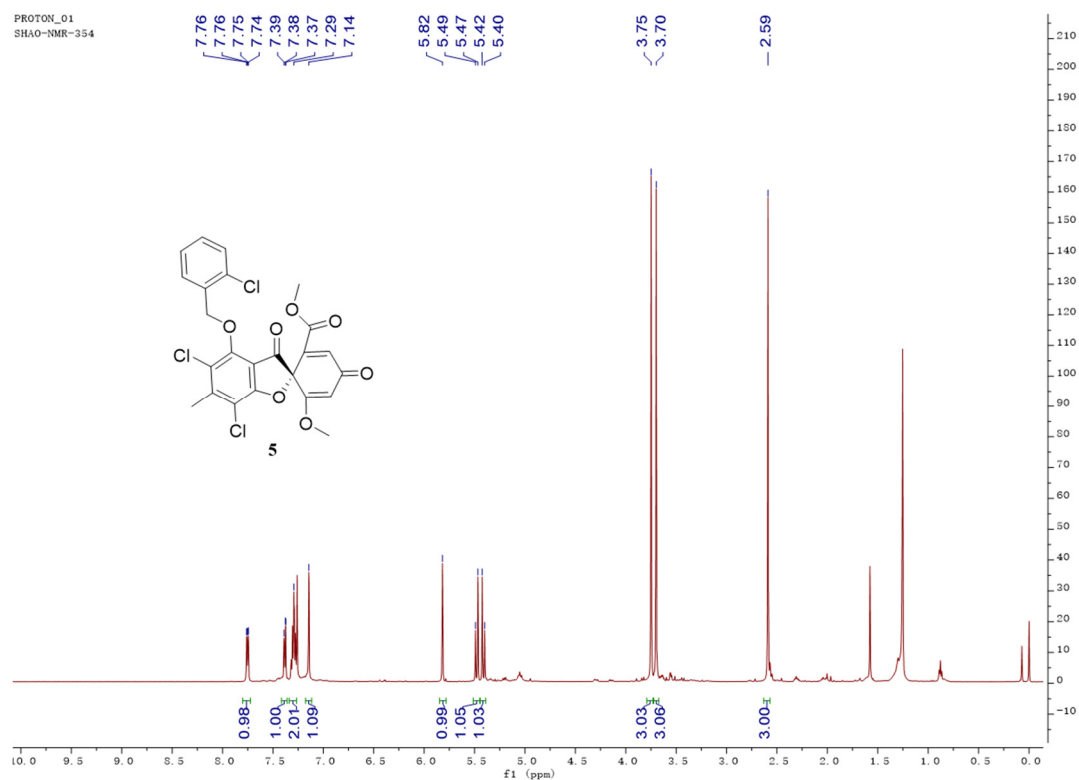

**Figure S13.**  $^1\text{H}$  NMR (500 MHz,  $\text{CDCl}_3$ ) spectrum of compound **5**

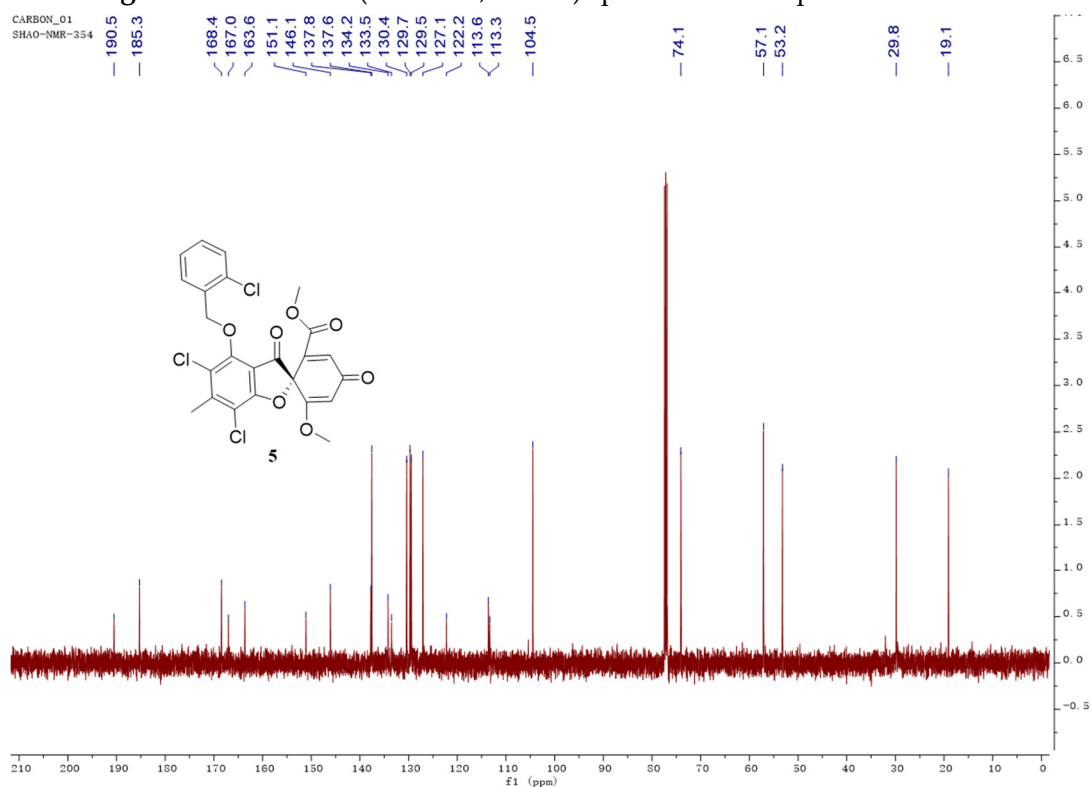

**Figure S14.**  $^{13}\text{C}$  NMR (125 MHz,  $\text{CDCl}_3$ ) spectrum of compound **5**

CHNQD-02110 #529 RT: 5.10 AV: 1 NL: 7.86E8  
T: FTMS + p ESI Fullms [100.00-1500.00]

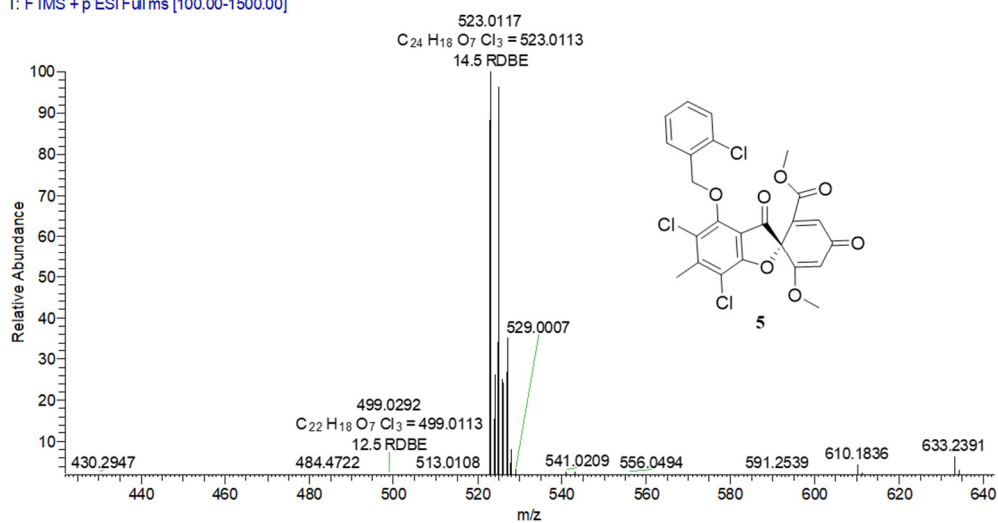

Figure S15. HRESIMS spectrum of compound 5

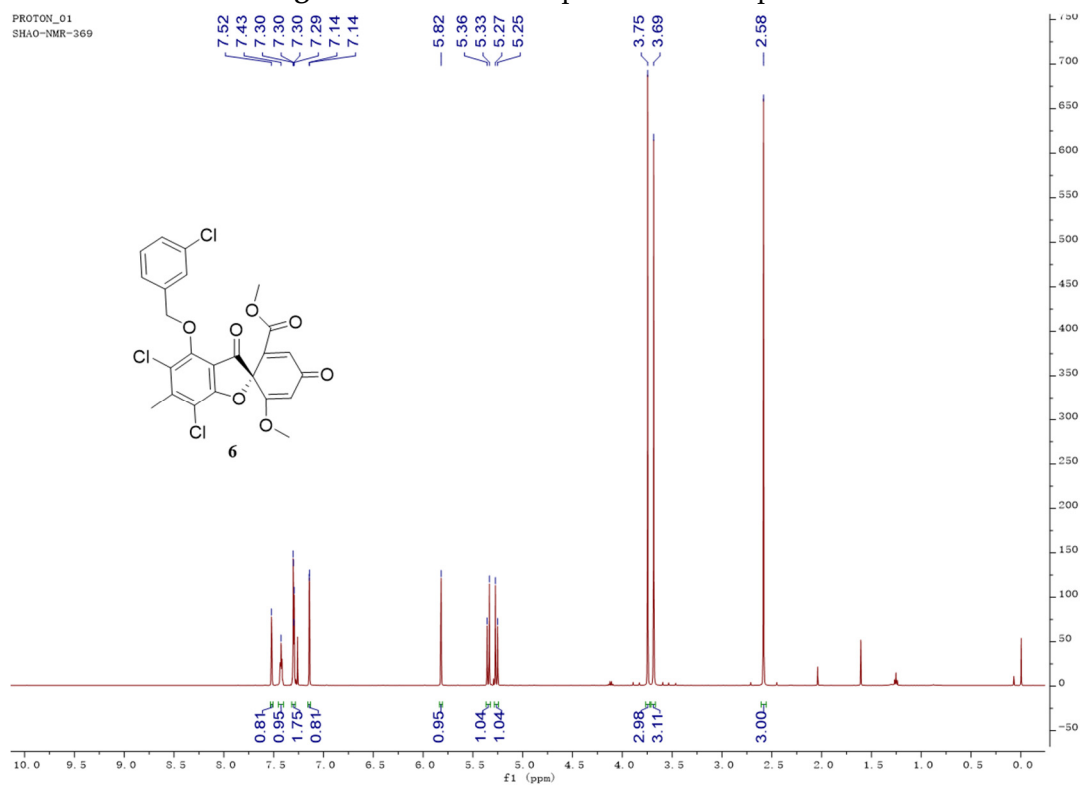

Figure S16. <sup>1</sup>H NMR (500 MHz, CDCl<sub>3</sub>) spectrum of compound 6



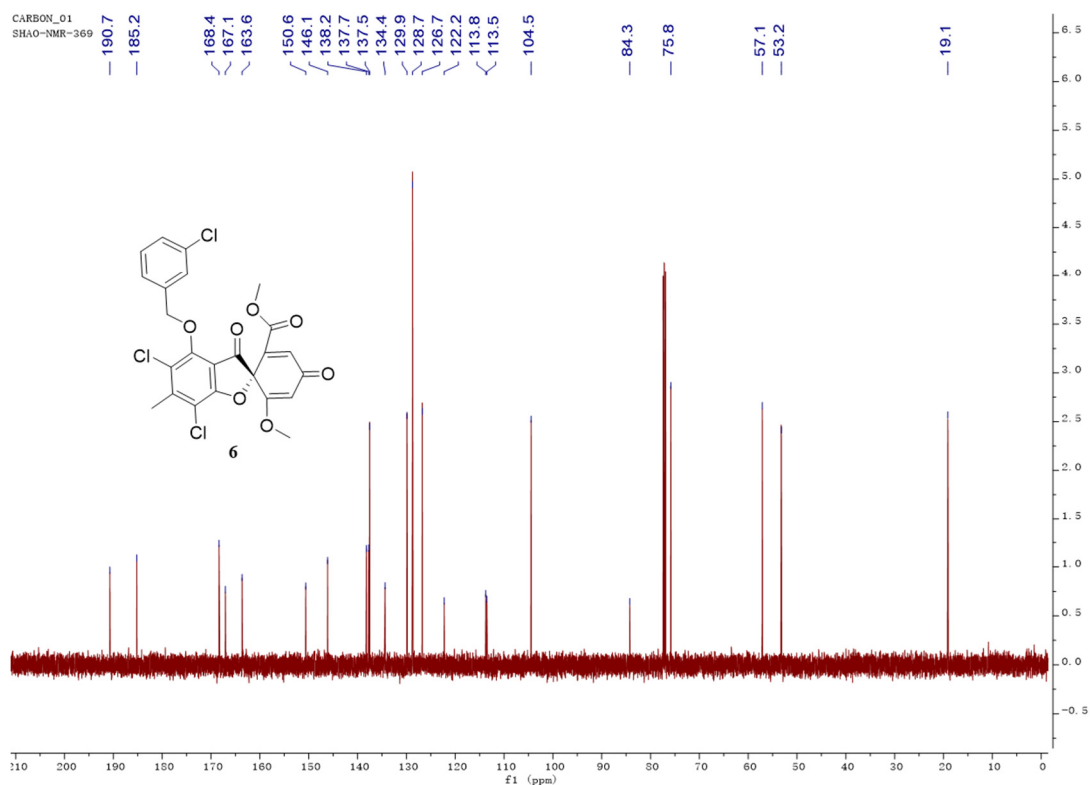

**Figure S17.**  $^{13}\text{C}$  NMR (125 MHz,  $\text{CDCl}_3$ ) spectrum of compound **6**

CHNQD-02121 #3-622 RT: 0.02-5.99 AV: 620 NL: 1.11E7  
T: FTMS + p ESI Full ms [100.00-1500.00]

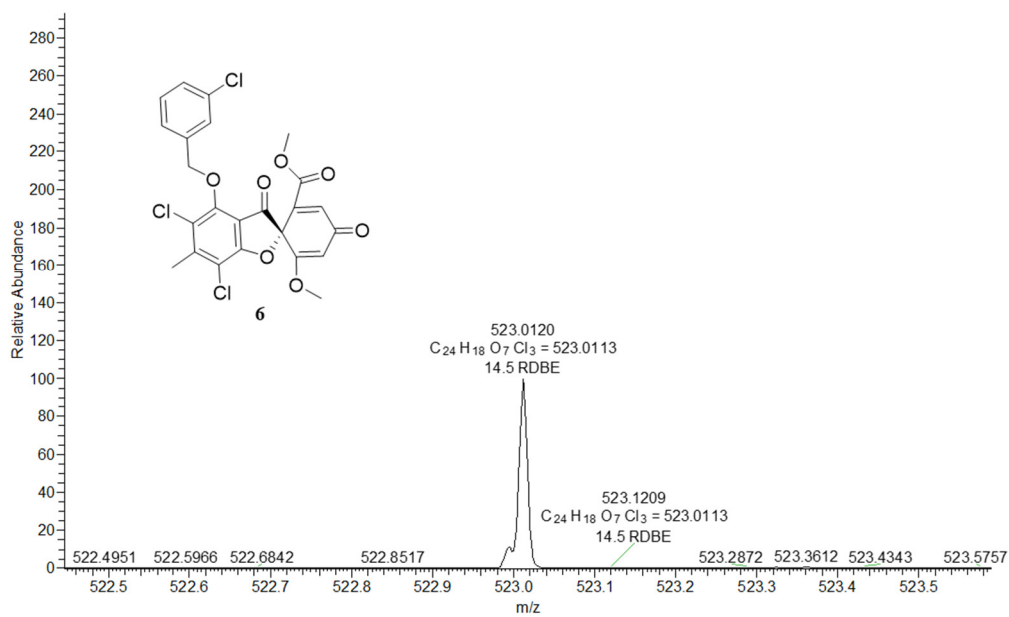

**Figure S18.** HRESIMS spectrum of compound **6**

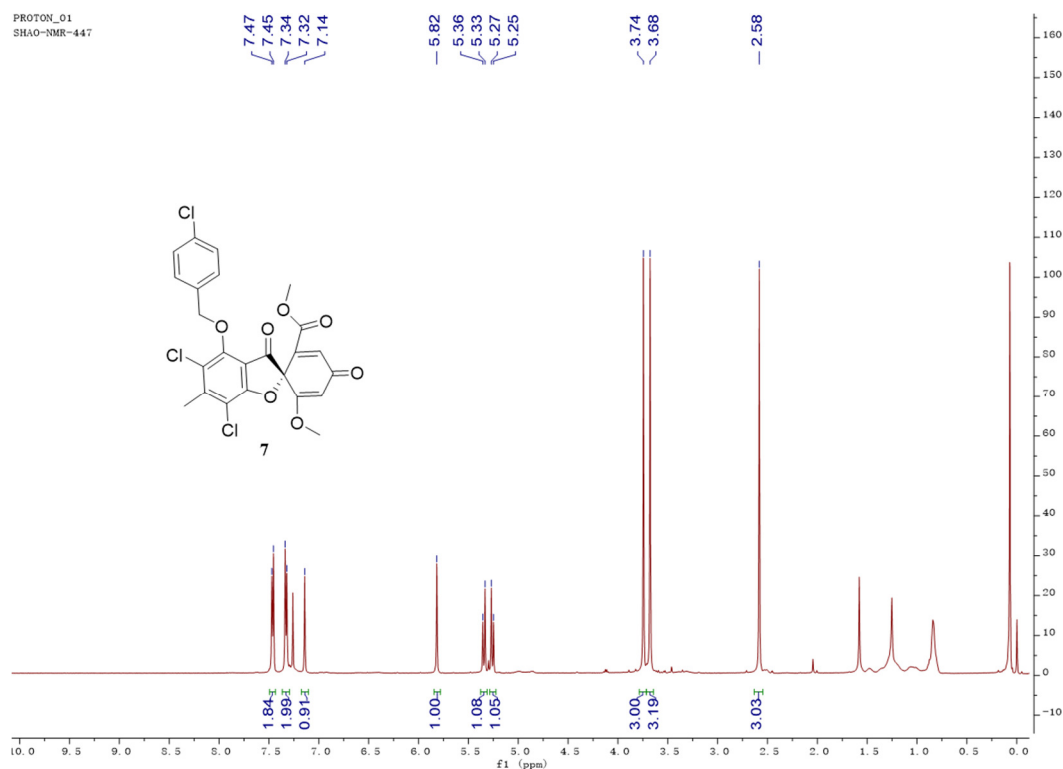

Figure S19.  $^1\text{H}$  NMR (500 MHz,  $\text{CDCl}_3$ ) spectrum of compound 7

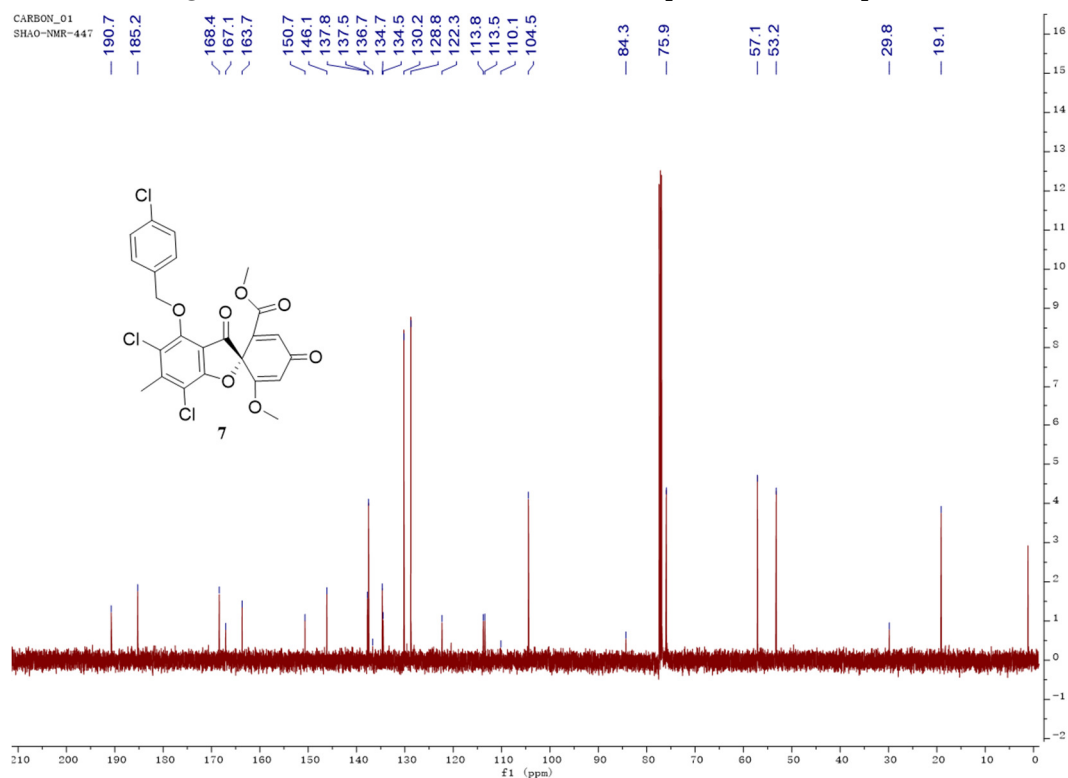

Figure S20.  $^{13}\text{C}$  NMR (125 MHz,  $\text{CDCl}_3$ ) spectrum of compound 7

20201106-CHNQ-02148\_201106083949 #21-22 RT: 0.58-0.61 AV: 2 NL: 4.54E6  
T: FTMS + p ESI Full ms [100.00-2000.00]

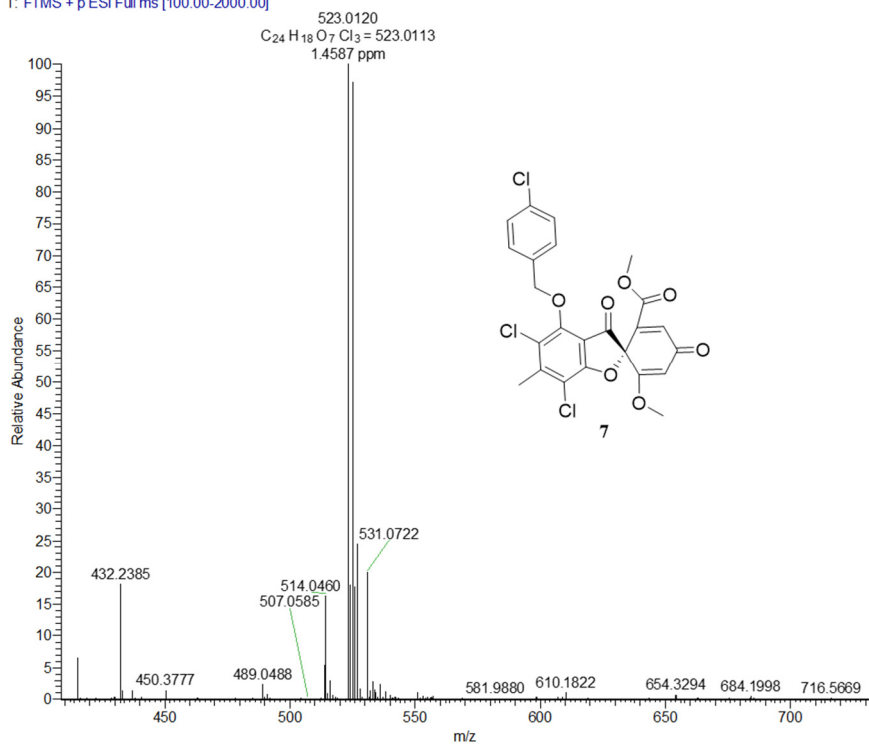

Figure S21. HRESIMS spectrum of compound 7

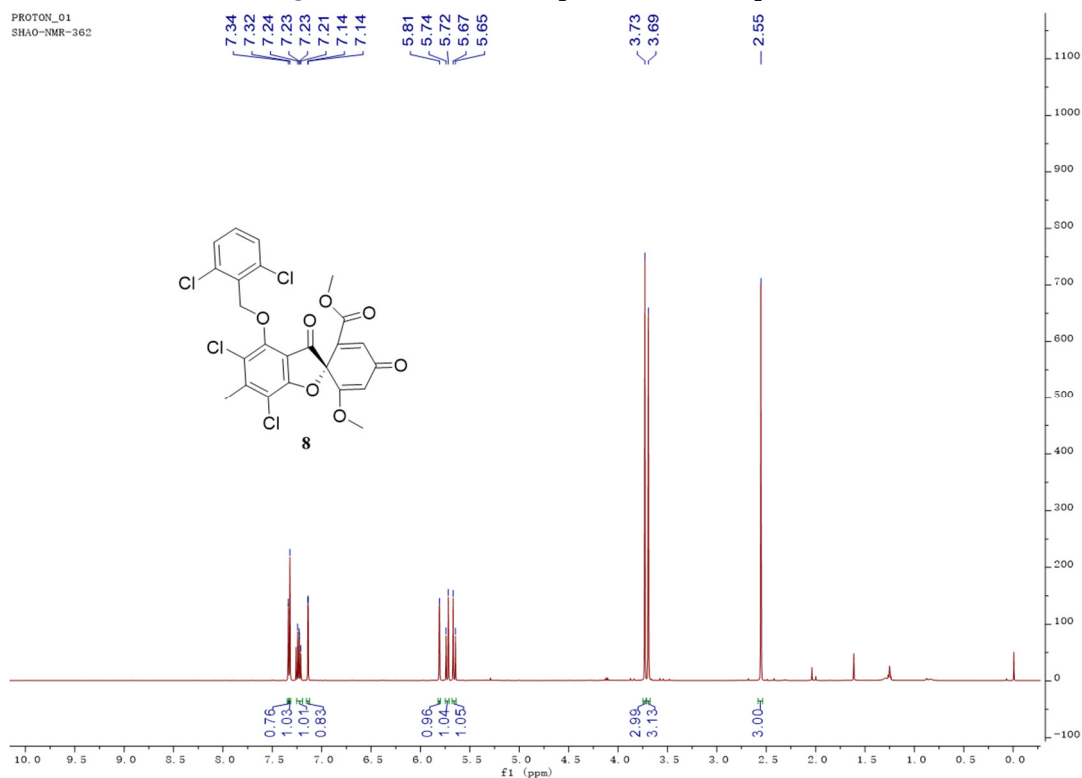

Figure S22. <sup>1</sup>H NMR (500 MHz, CDCl<sub>3</sub>) spectrum of compound 8

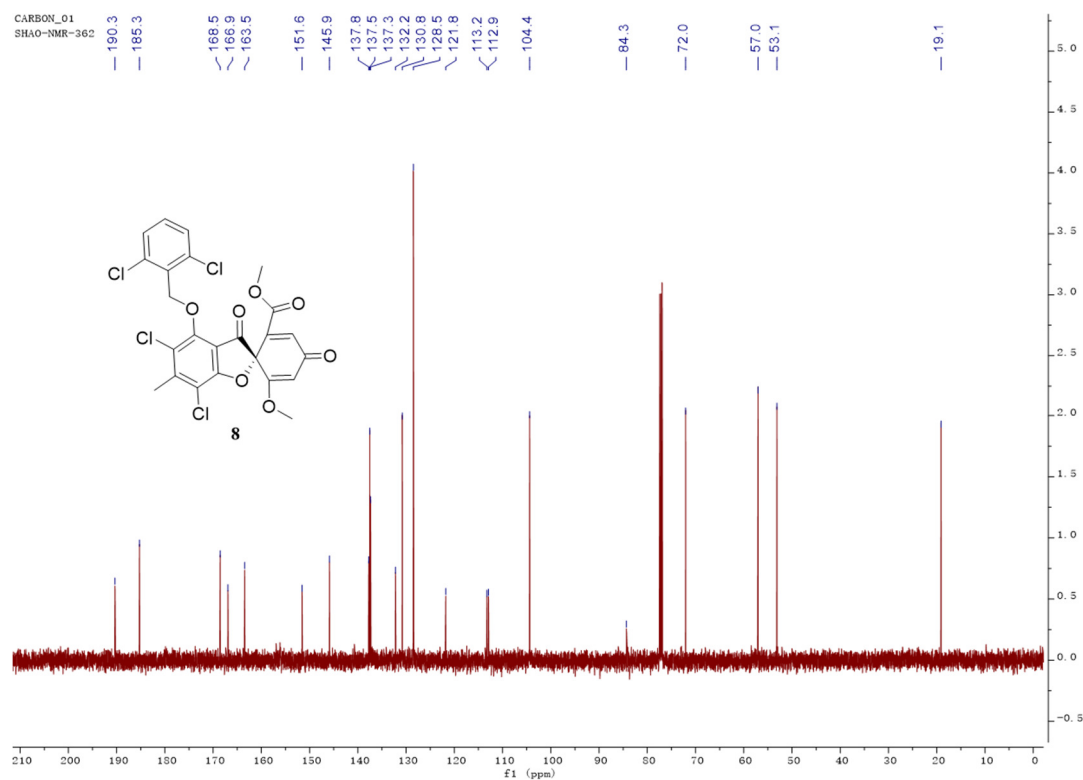

**Figure S23.**  $^{13}\text{C}$  NMR (125 MHz,  $\text{CDCl}_3$ ) spectrum of compound **8**

CHNQD-02116 #1-624 RT: 0.00-6.01 AV: 624 NL: 1.11E7  
T: FTMS + p ESI Full ms [100.00-1500.00]

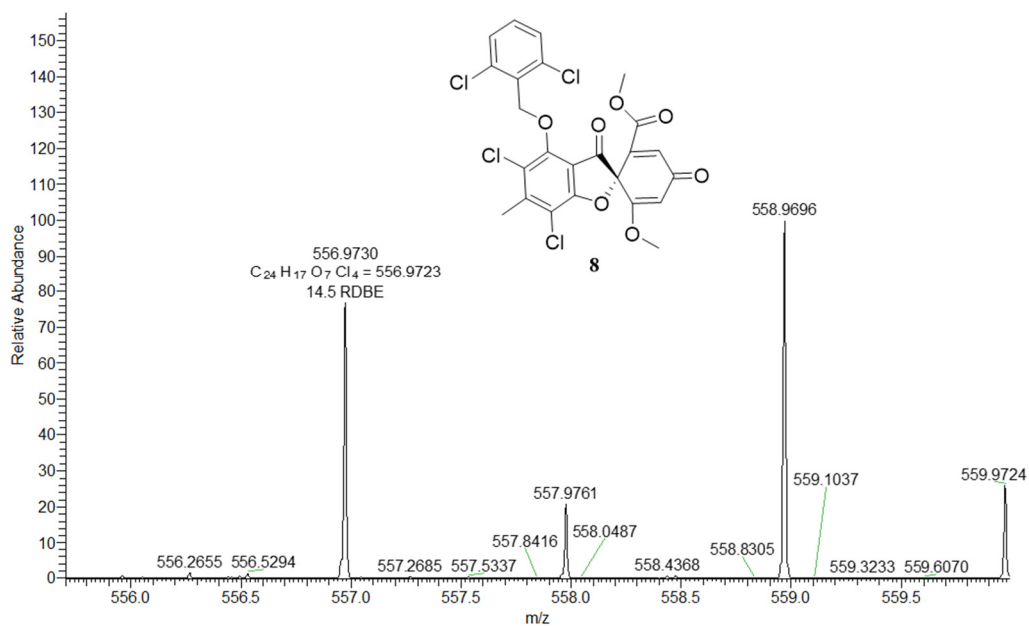

**Figure S24.** HRESIMS spectrum of compound **8**

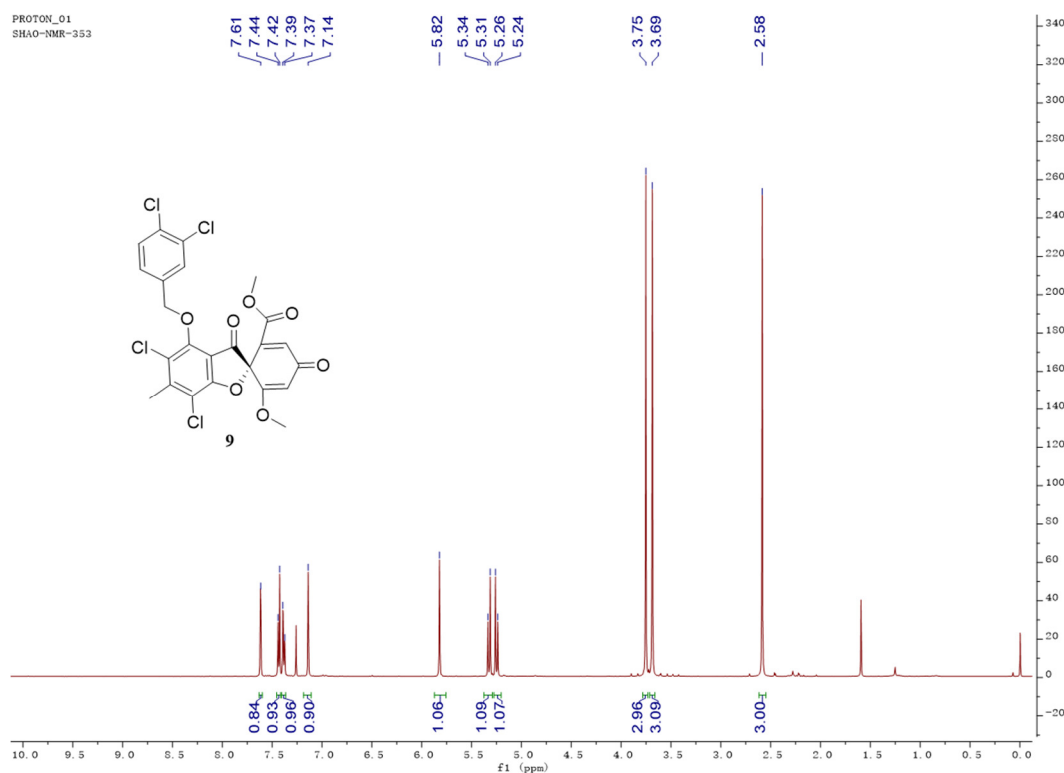

Figure S25.  $^1\text{H}$  NMR (500 MHz,  $\text{CDCl}_3$ ) spectrum of compound 9

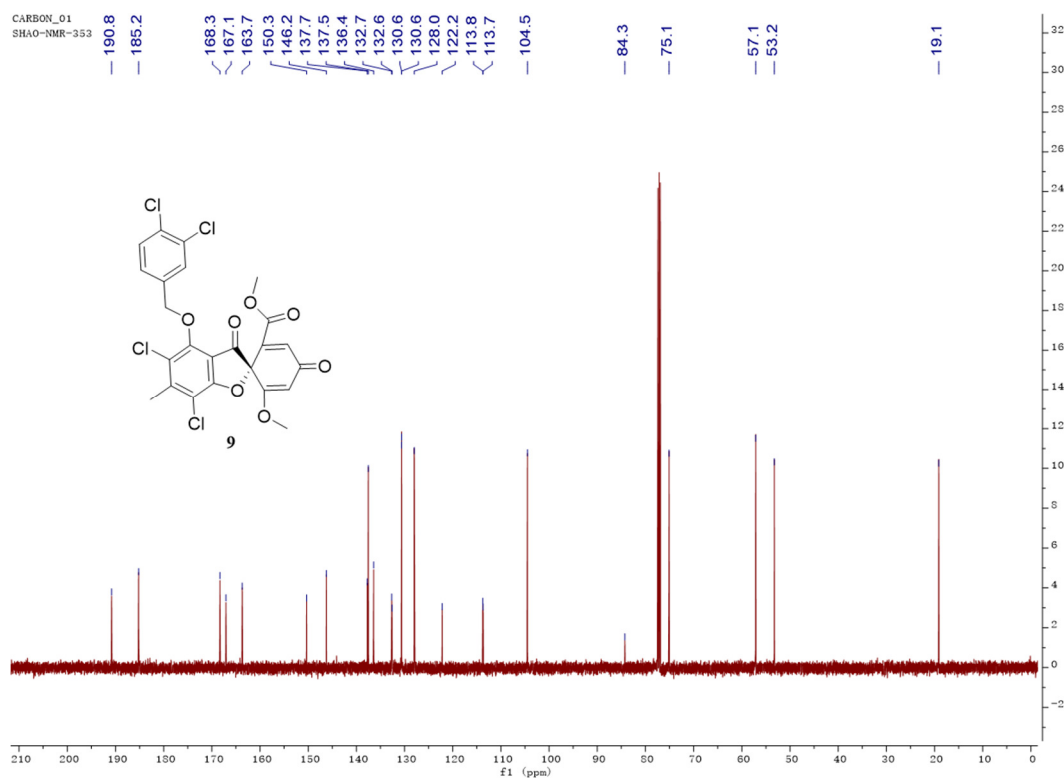

Figure S26.  $^{13}\text{C}$  NMR (125 MHz,  $\text{CDCl}_3$ ) spectrum of compound 9

CHNQD-02109 #2-625 RT: 0.01-6.02 AV: 624 NL: 5.01E6  
T: FTMS - p ESI Full ms [100.00-1500.00]

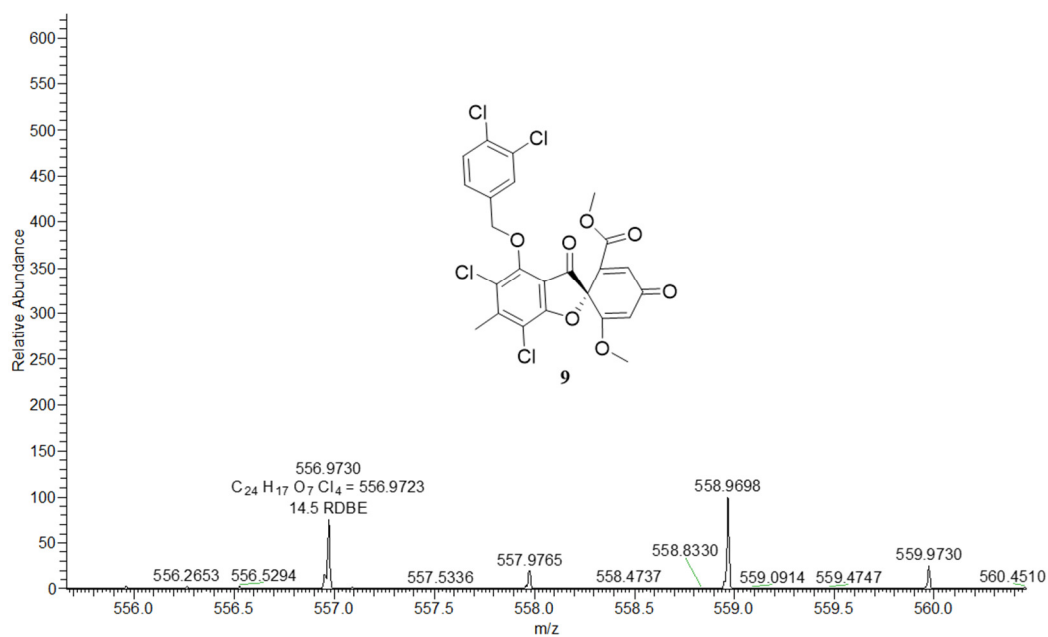

Figure S27. HRESIMS spectrum of compound 9

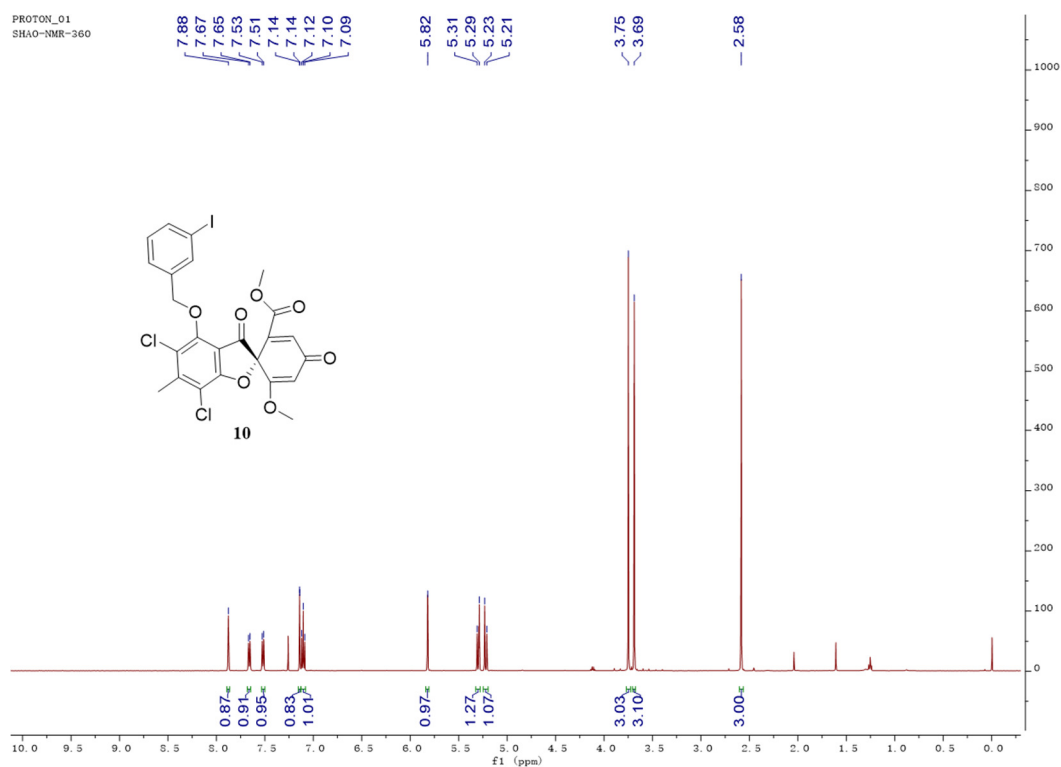

Figure S28. <sup>1</sup>H NMR (500 MHz, CDCl<sub>3</sub>) spectrum of compound 10

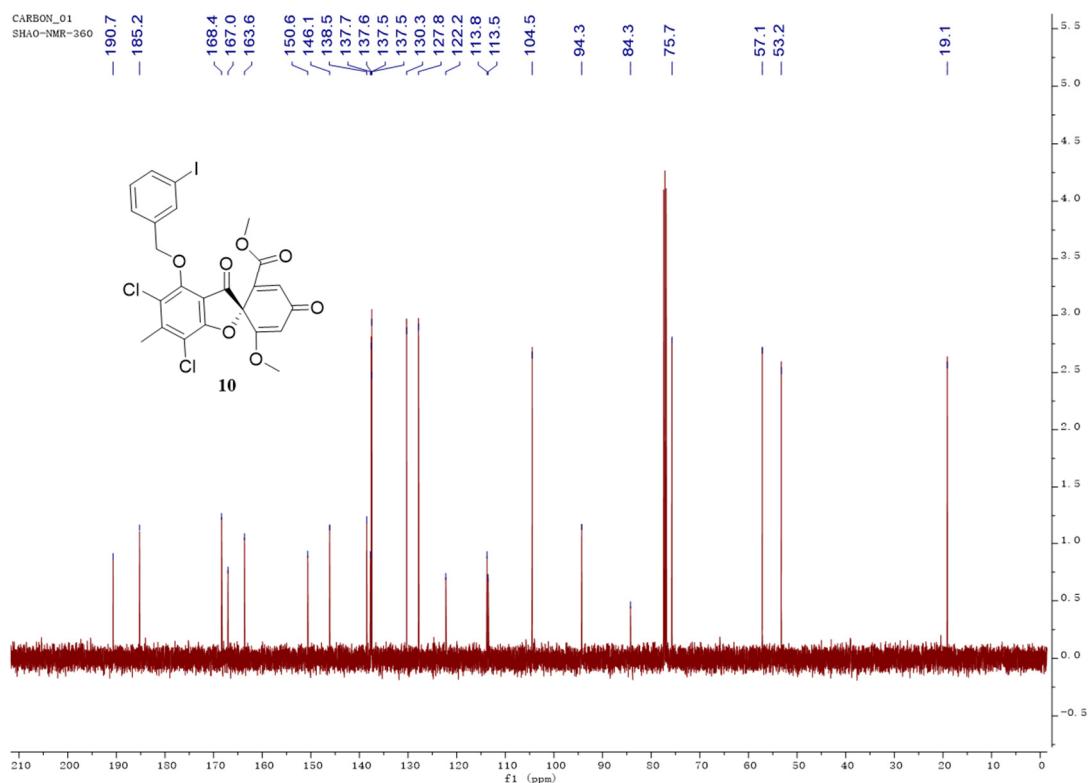

**Figure S29.**  $^{13}\text{C}$  NMR (125 MHz,  $\text{CDCl}_3$ ) spectrum of compound **10**

CHNQD-02114 #551 RT: 5.31 AV: 1 NL: 6.05E8  
T: FTMS + p ESI Full ms [100.00-1500.00]

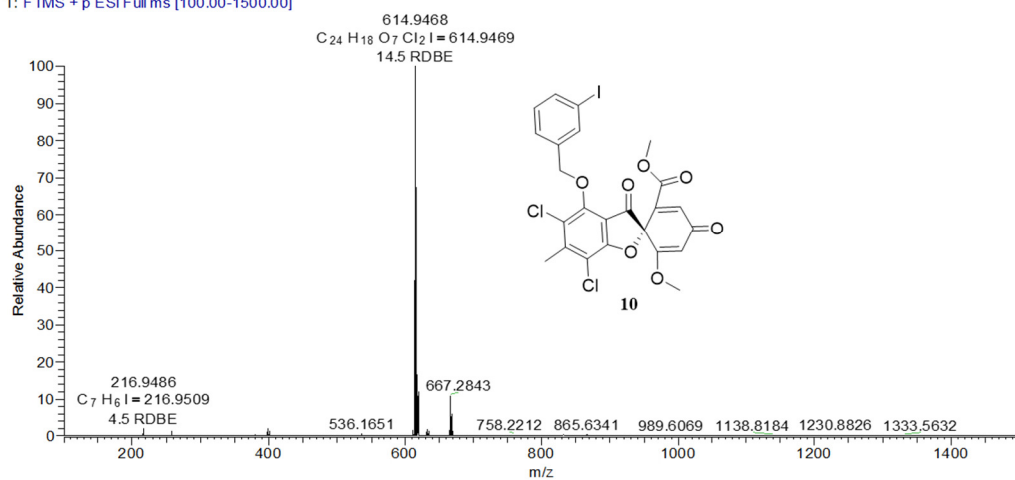

**Figure S30.** HRESIMS spectrum of compound **10**

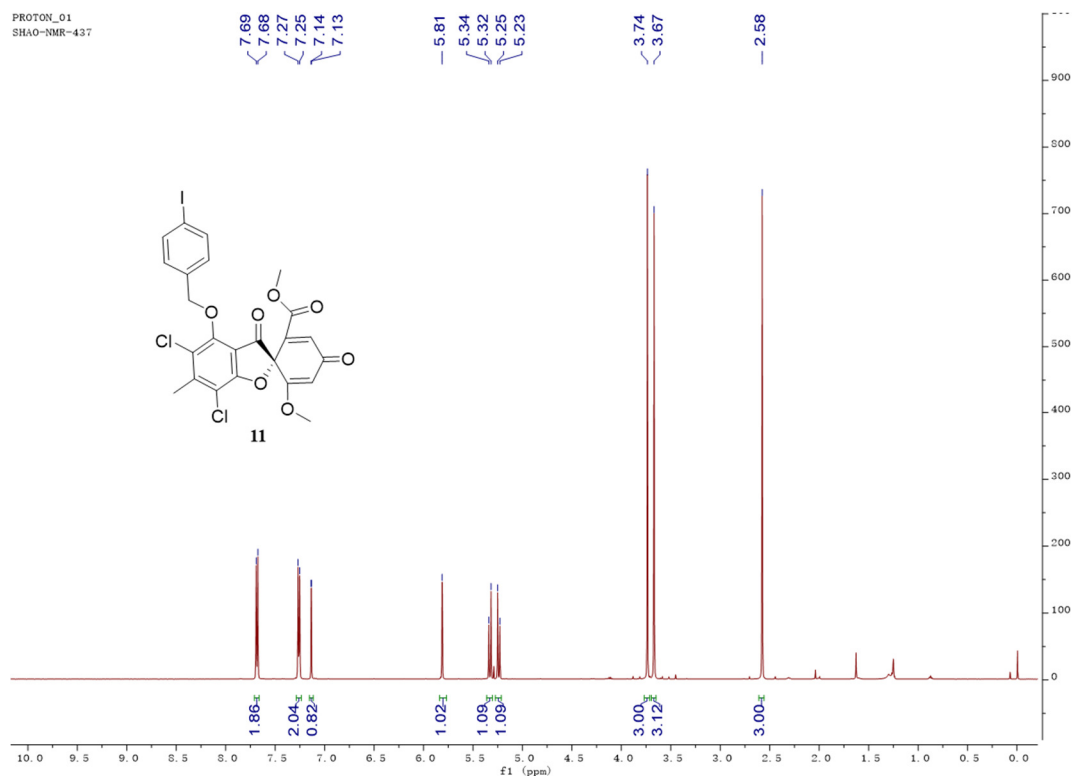

**Figure S31.**  $^1\text{H}$  NMR (500 MHz,  $\text{CDCl}_3$ ) spectrum of compound **11**

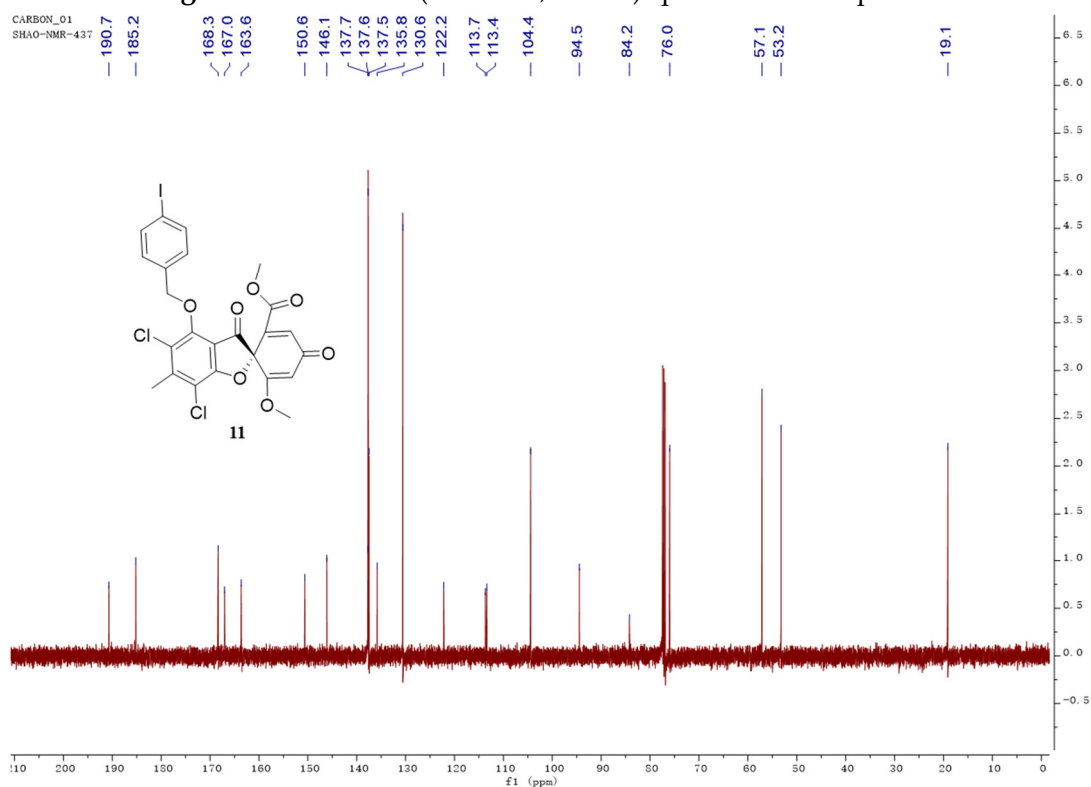

**Figure S32.**  $^{13}\text{C}$  NMR (125 MHz,  $\text{CDCl}_3$ ) spectrum of compound **11**



CHNQD-02127 #538 RT: 5.19 AV: 1 NL: 3.44E7  
T: FTMS - p ESI Full ms [100.00-1500.00]

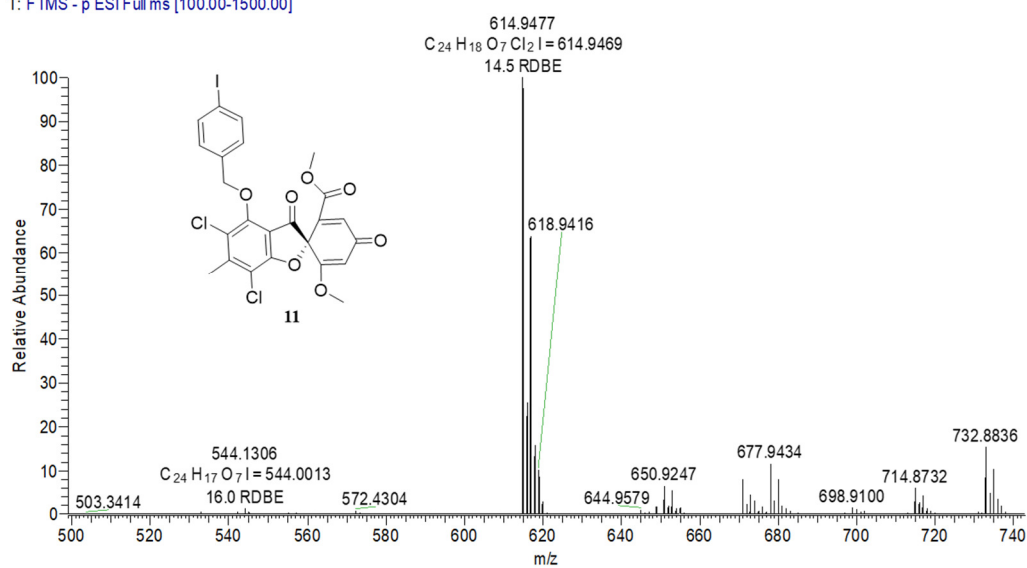

Figure S33. HRESIMS spectrum of compound **11**

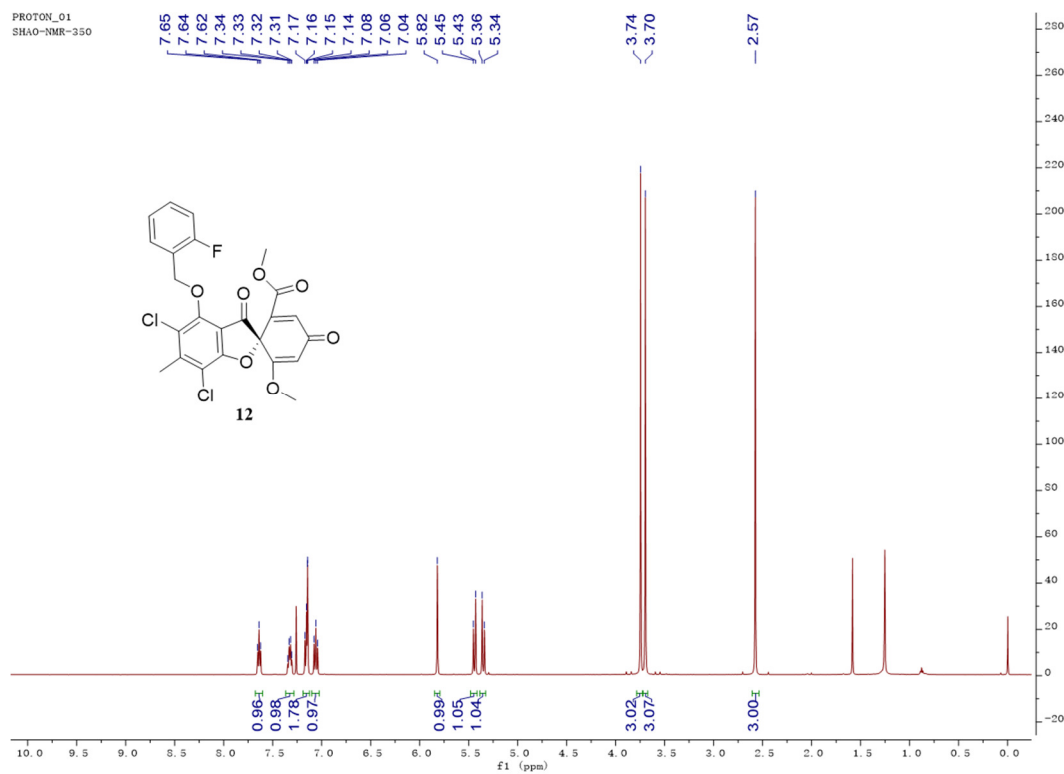

Figure S34. <sup>1</sup>H NMR (500 MHz, CDCl<sub>3</sub>) spectrum of compound **12**

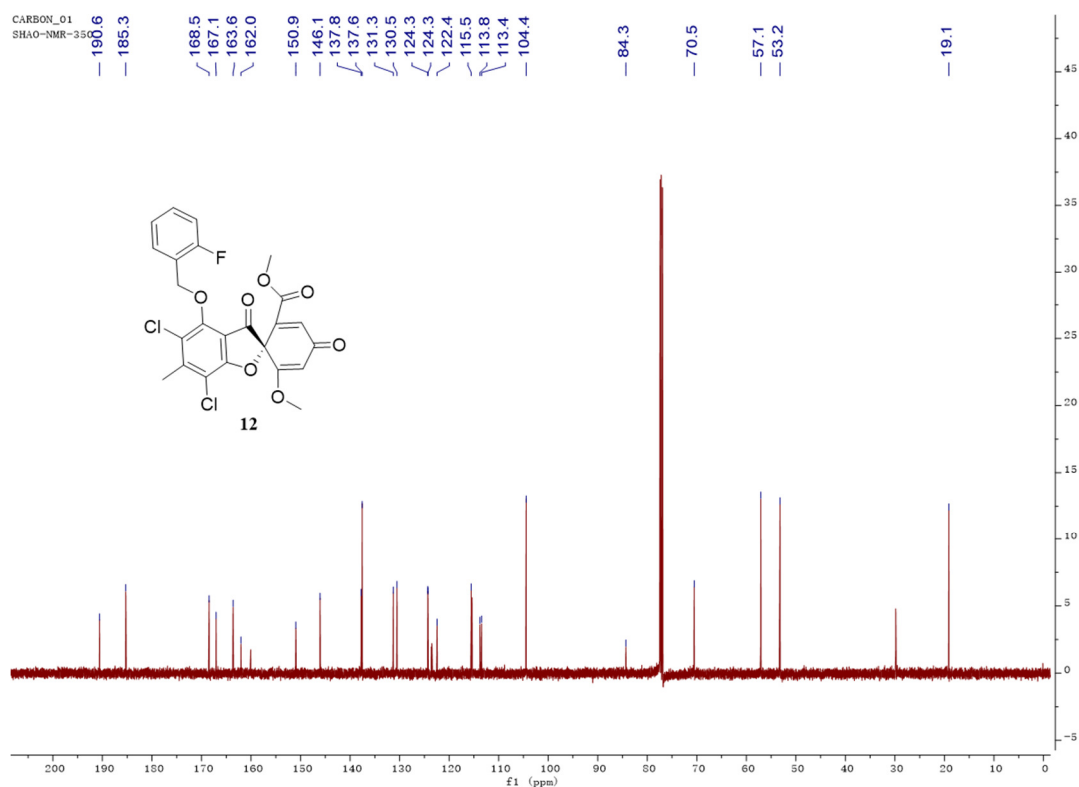

**Figure S35.**  $^{13}\text{C}$  NMR (125 MHz,  $\text{CDCl}_3$ ) spectrum of compound **12**

CHNQD-02106 #497 RT: 4.78 AV: 1 NL: 1.02E9  
T: FTMS + p ESI Full ms [100.00-1500.00]

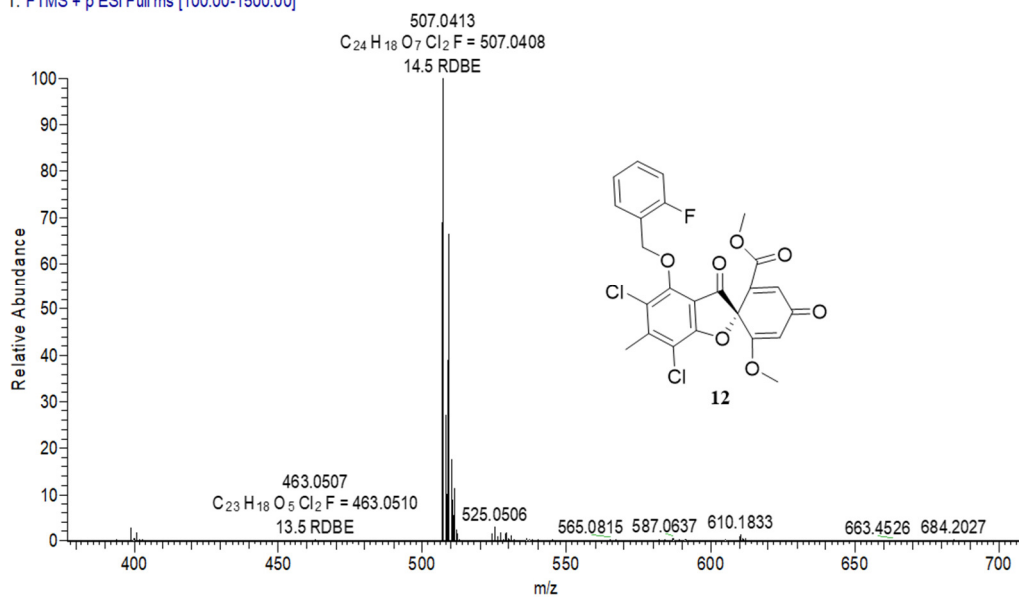

**Figure S36.** HRESIMS spectrum of compound **12**

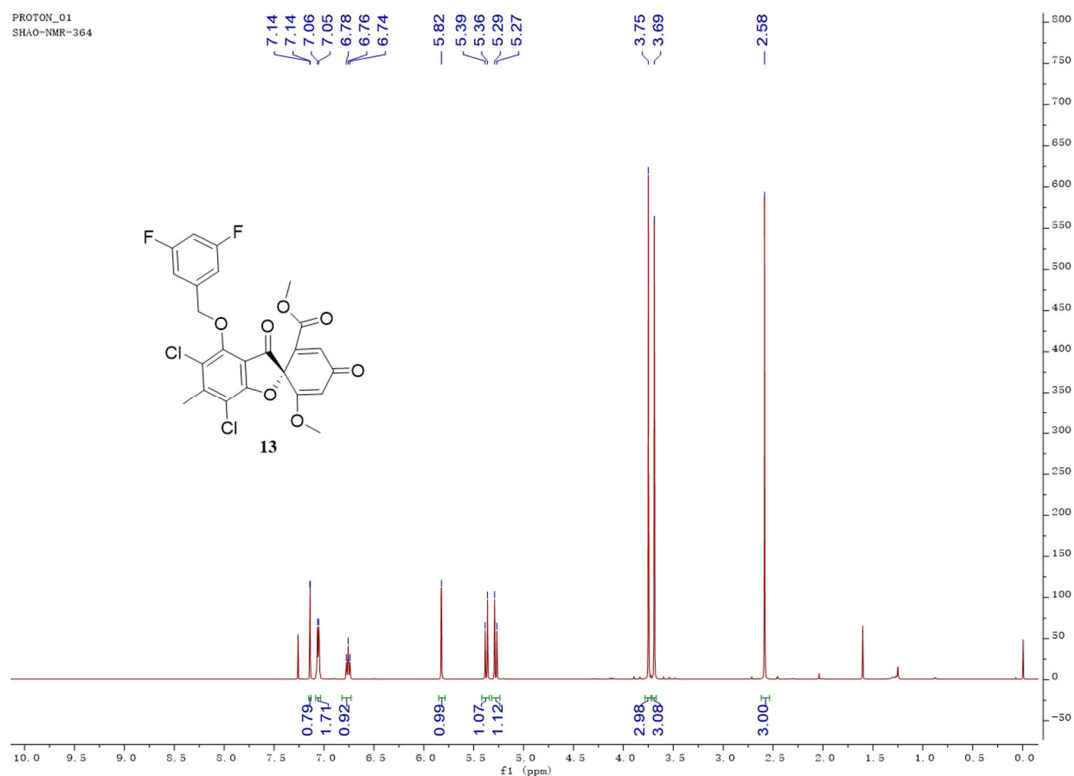

**Figure S37.**  $^1\text{H}$  NMR (500 MHz,  $\text{CDCl}_3$ ) spectrum of compound **13**

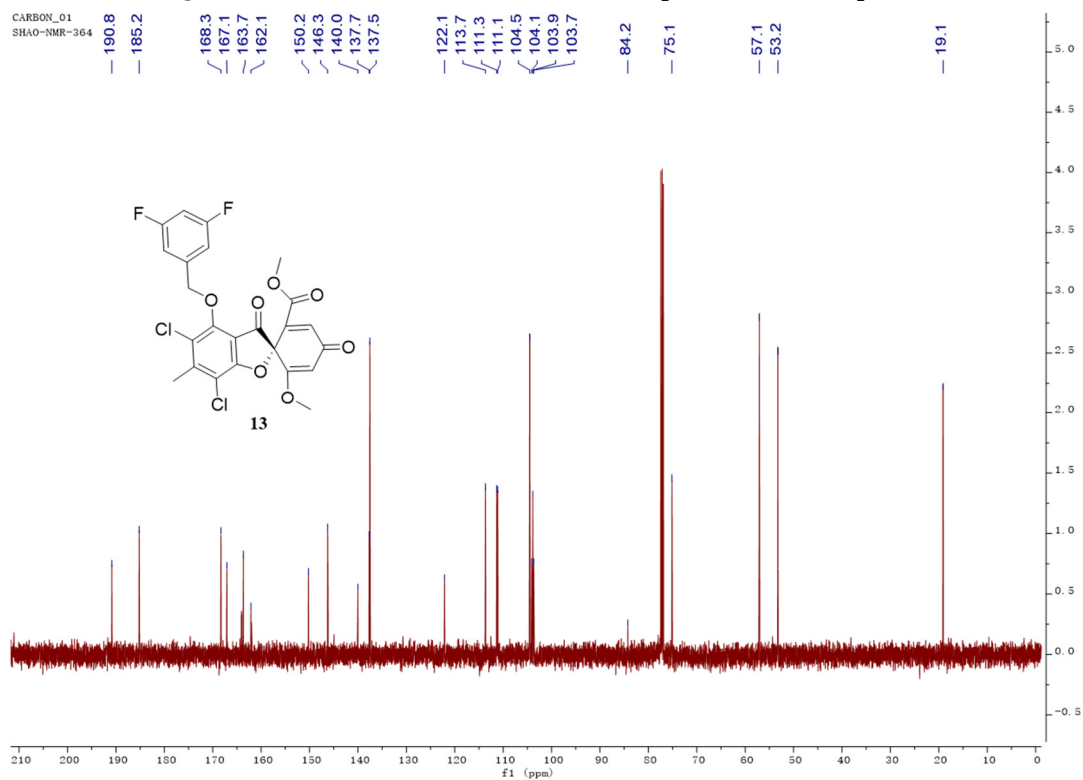

**Figure S38.**  $^{13}\text{C}$  NMR (125 MHz,  $\text{CDCl}_3$ ) spectrum of compound **13**

CHNOD-02117 #521 RT: 5.03 AV: 1 NL: 5.26E8  
T: FTMS + p ESI Full ms [100.00-1500.00]

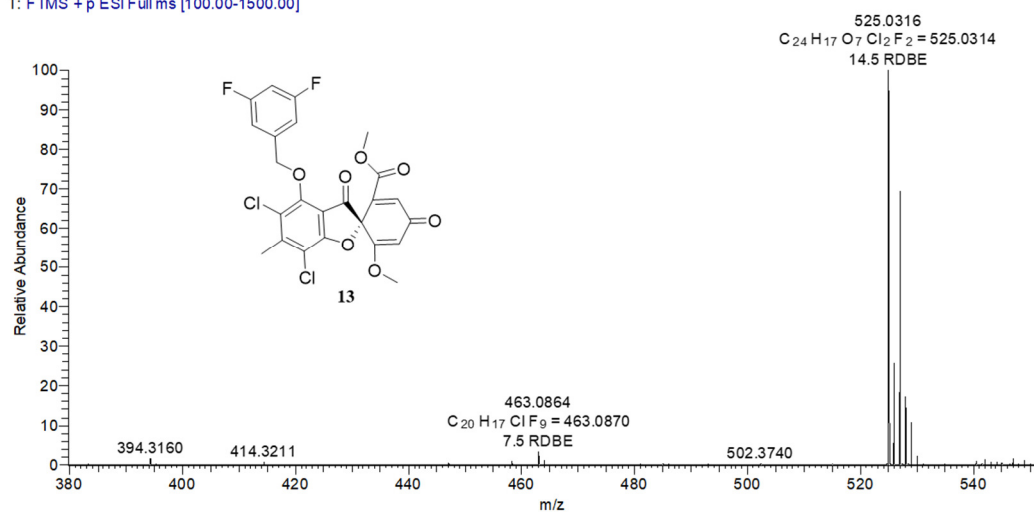

Figure S39. HRESIMS spectrum of compound 13

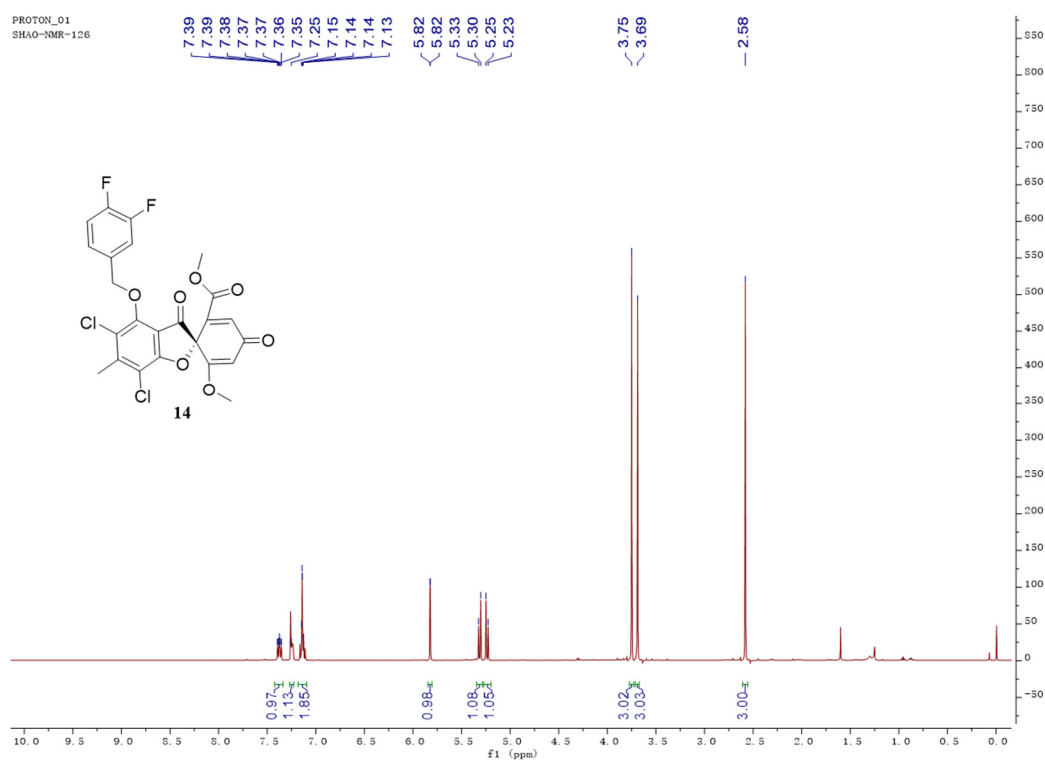

Figure S40.  $^1H$  NMR (500 MHz,  $CDCl_3$ ) spectrum of compound 14

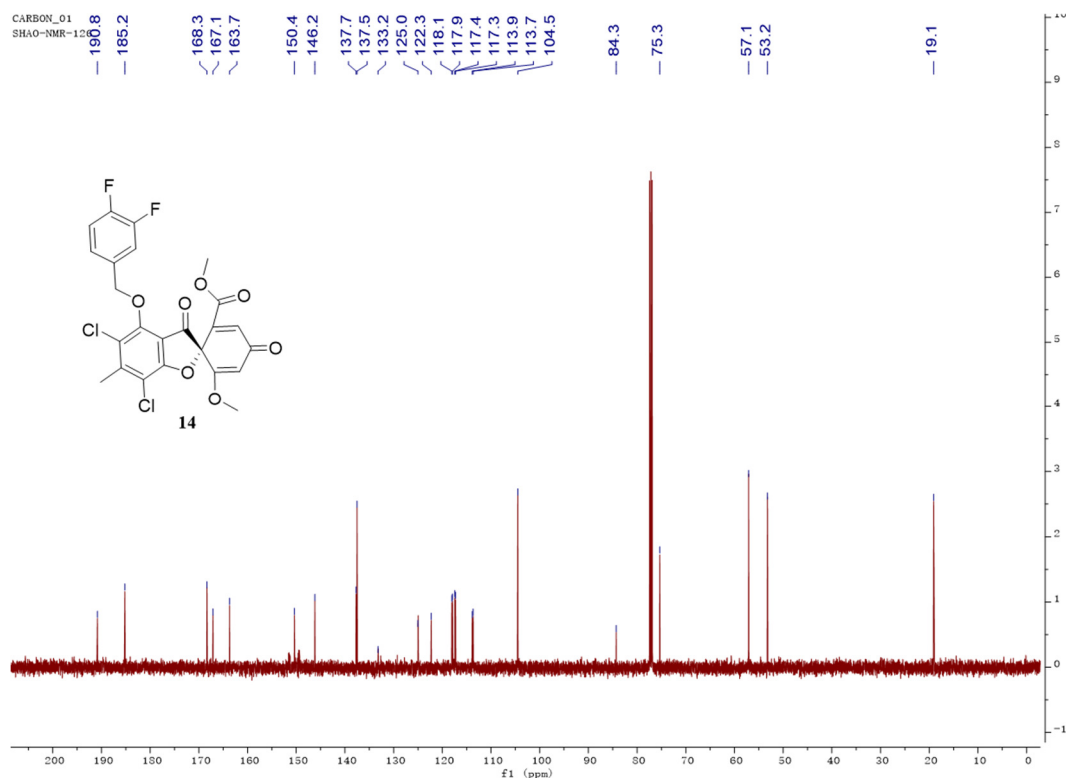

**Figure S41.**  $^{13}\text{C}$  NMR (125 MHz,  $\text{CDCl}_3$ ) spectrum of compound **14**

CHNQD-02103 #500 RT: 4.81 AV: 1 NL: 2.09E8  
T: FTMS - p ESI Full ms [100.00-1500.00]

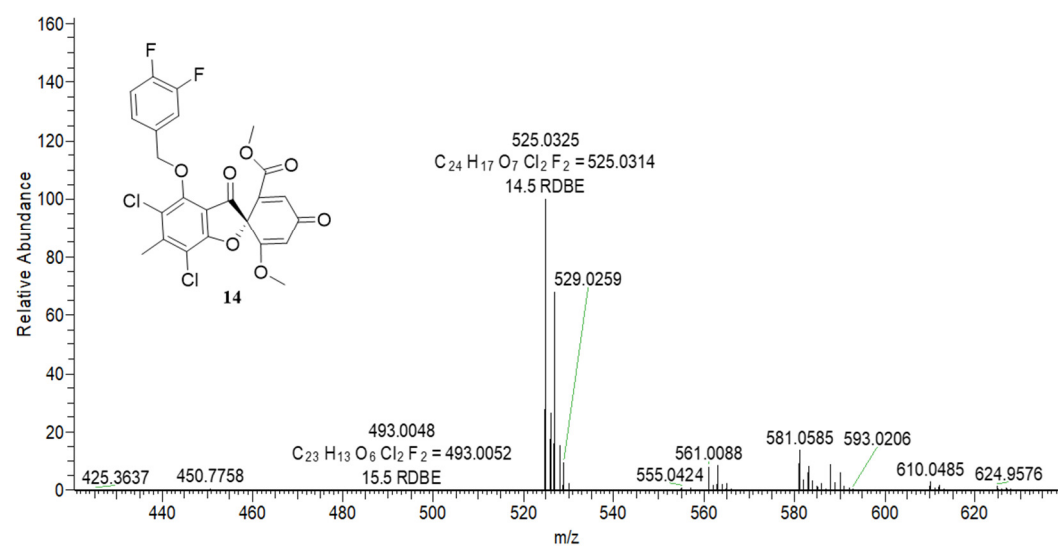

**Figure S42.** HRESIMS spectrum of compound **14**

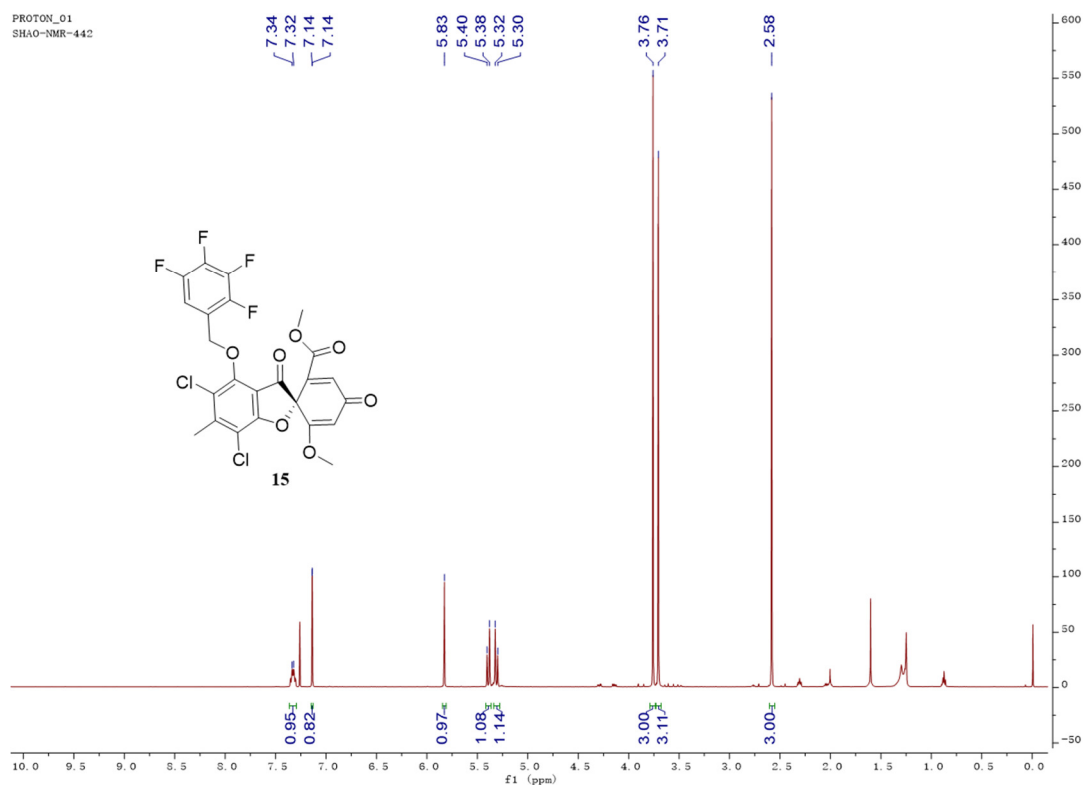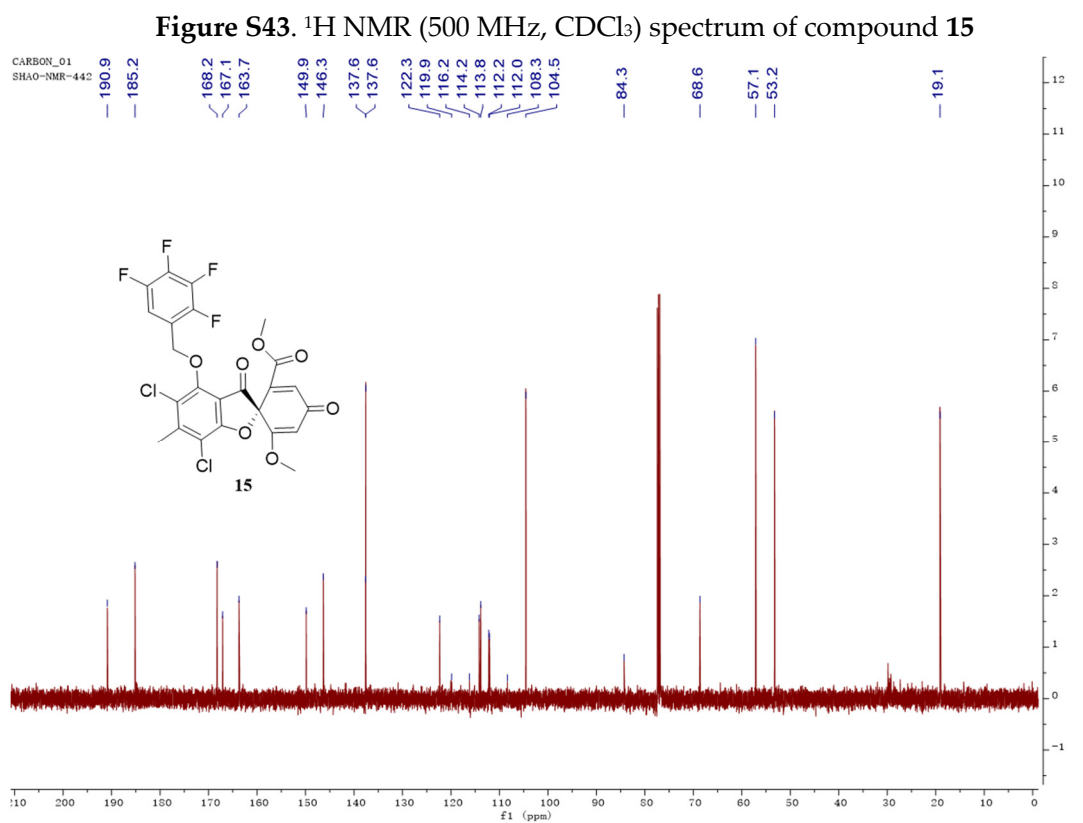

CHNQD-02128 #520 RT: 5.02 AV: 1 NL: 1.30E9  
T: FTMS -p ESI/Full ms [100.00-1500.00]

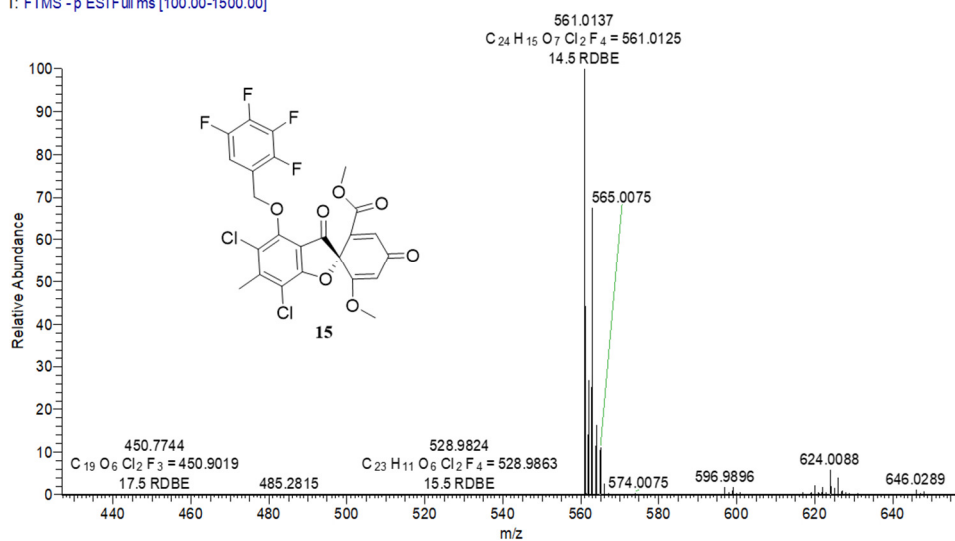

Figure S45. HRESIMS spectrum of compound 15

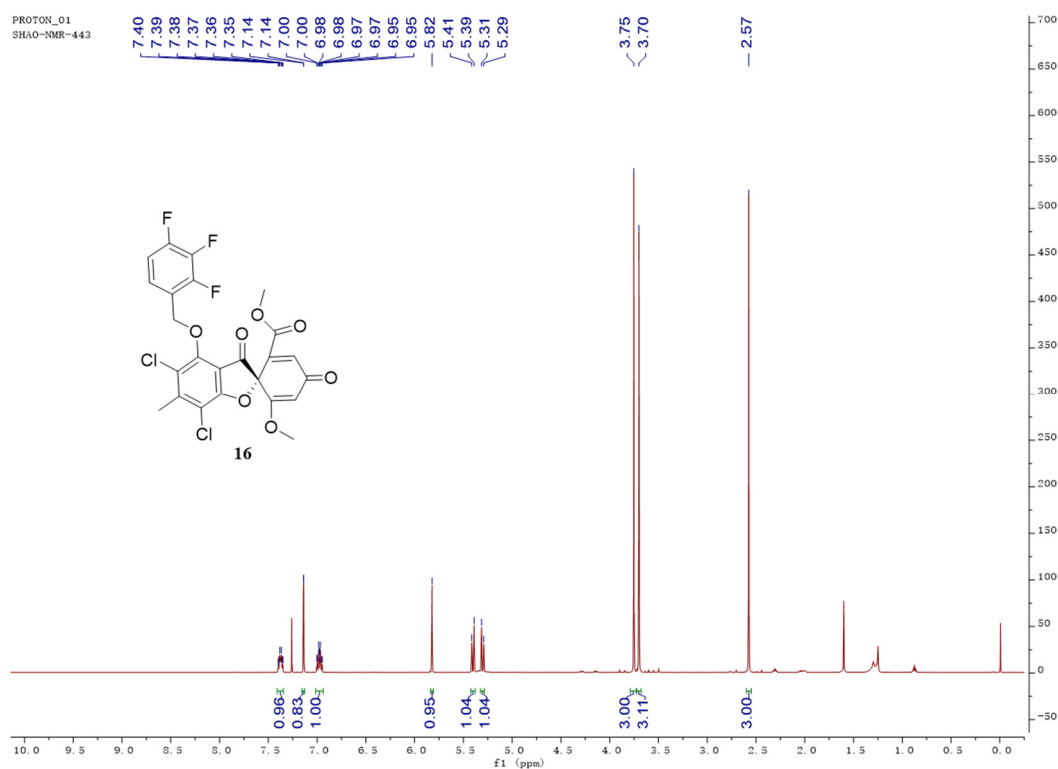

Figure S46. <sup>1</sup>H NMR (500 MHz, CDCl<sub>3</sub>) spectrum of compound 16

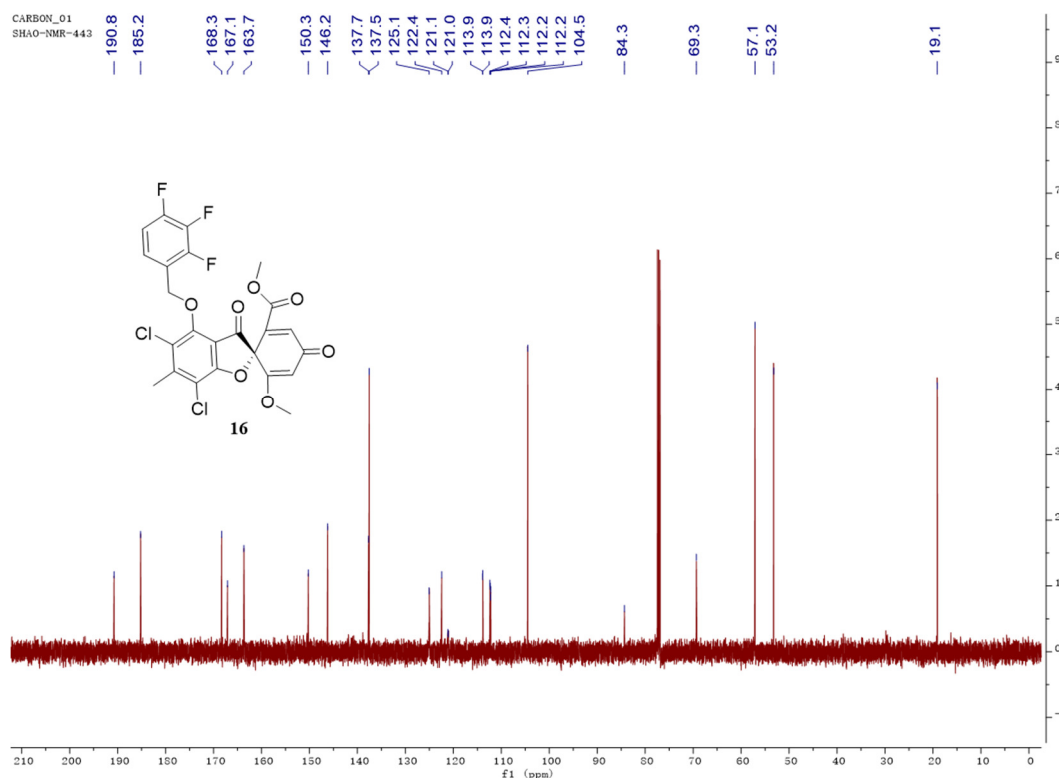

**Figure S47.**  $^{13}\text{C}$  NMR (125 MHz,  $\text{CDCl}_3$ ) spectrum of compound **16**

CHNQD-02129 #487-528 RT: 4.71-5.10 AV: 42 NL: 1.88E8  
T: FTMS + p ESI Fullms [100.00-1500.00]

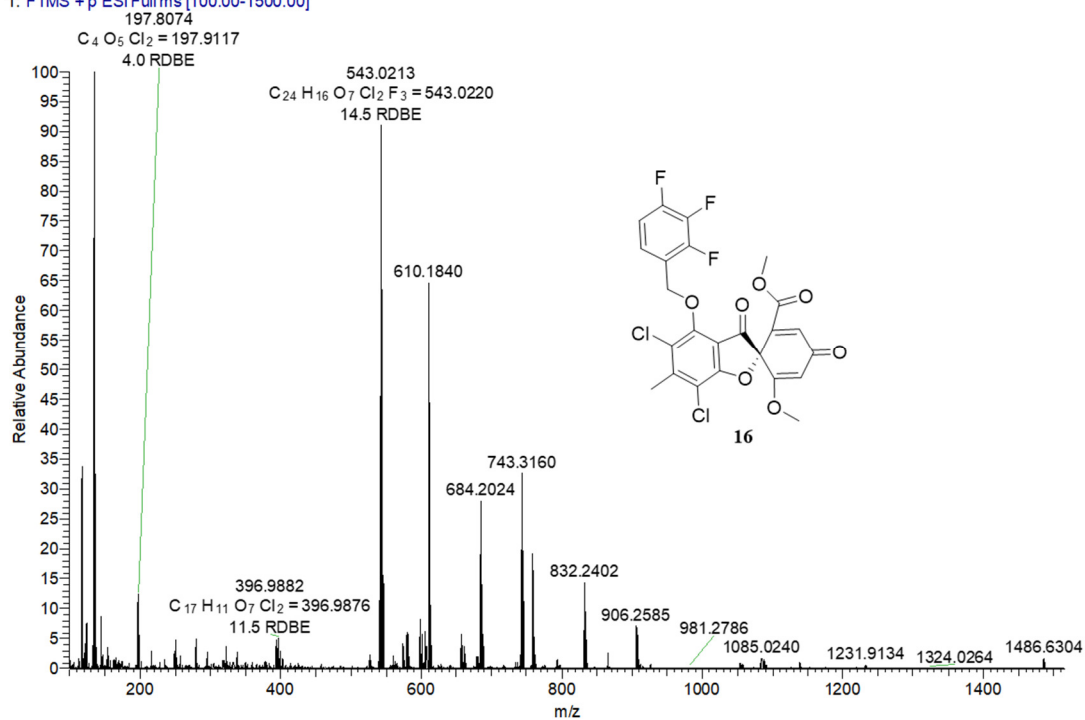

**Figure S48.** HRESIMS spectrum of compound **16**



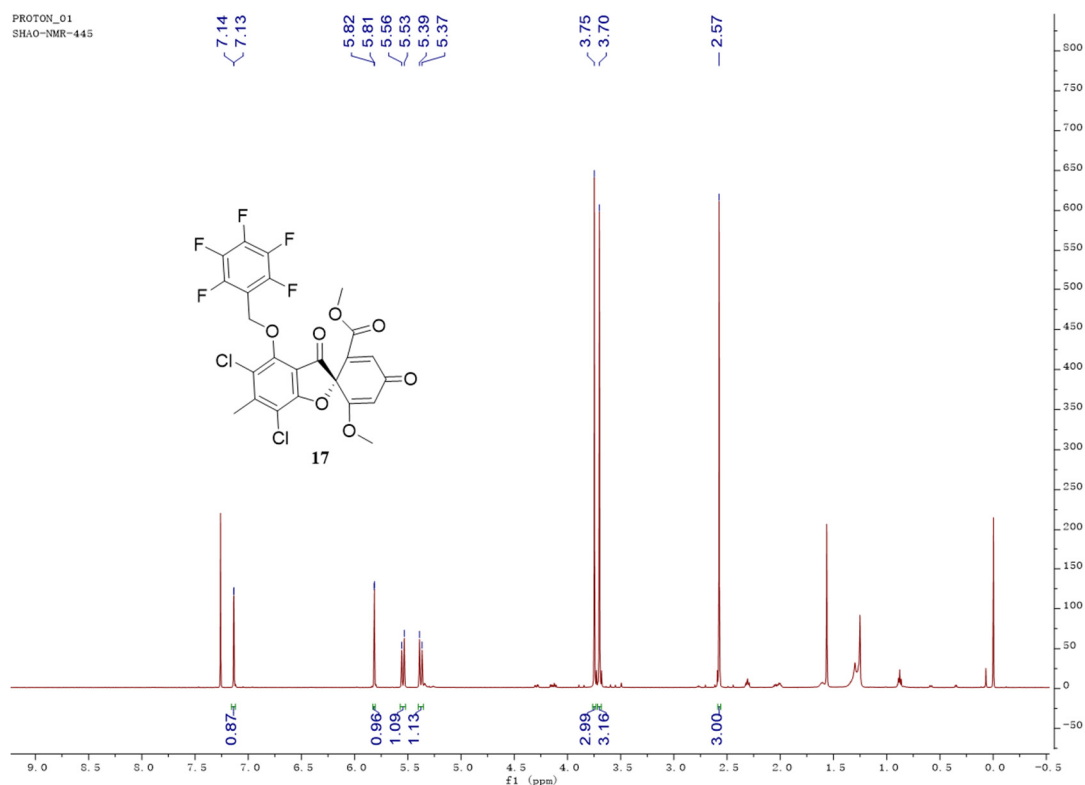

**Figure S49.**  $^1\text{H}$  NMR (500 MHz,  $\text{CDCl}_3$ ) spectrum of compound 17

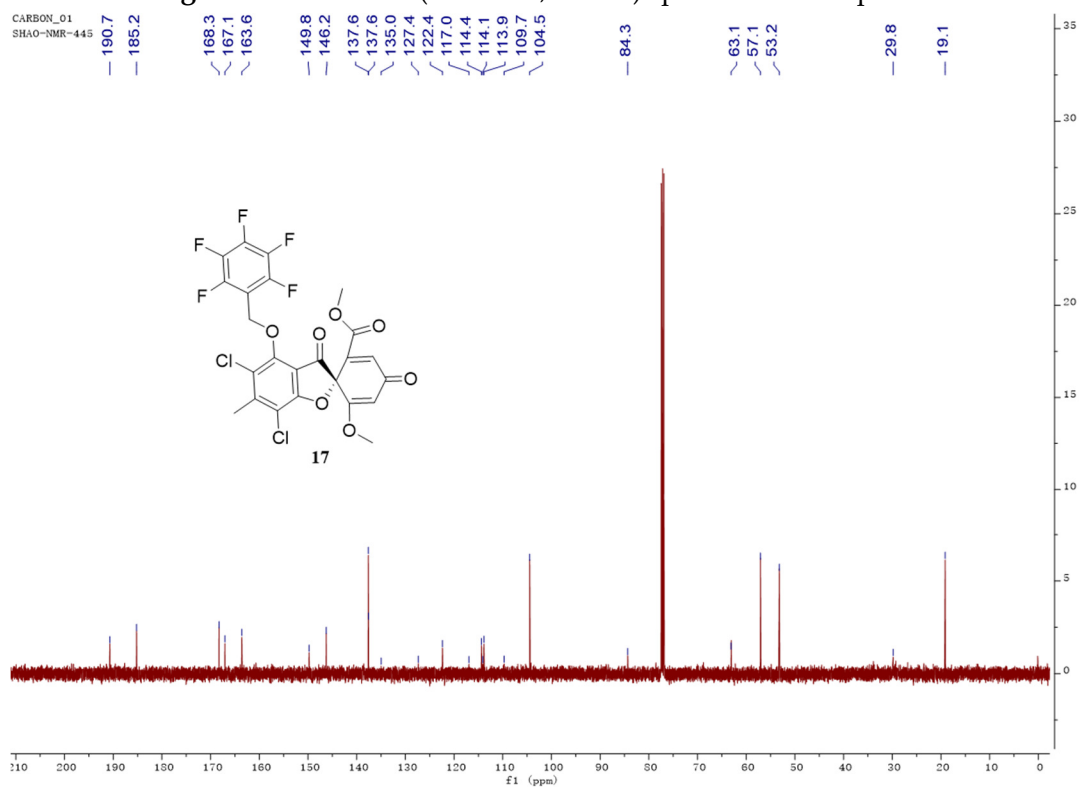

**Figure S50.**  $^{13}\text{C}$  NMR (125 MHz,  $\text{CDCl}_3$ ) spectrum of compound 17

CHNQD-02130 #515 RT: 4.98 AV: 1 NL: 7.65E7

T: FTMS + p ESIFulms [100.00-1500.00]

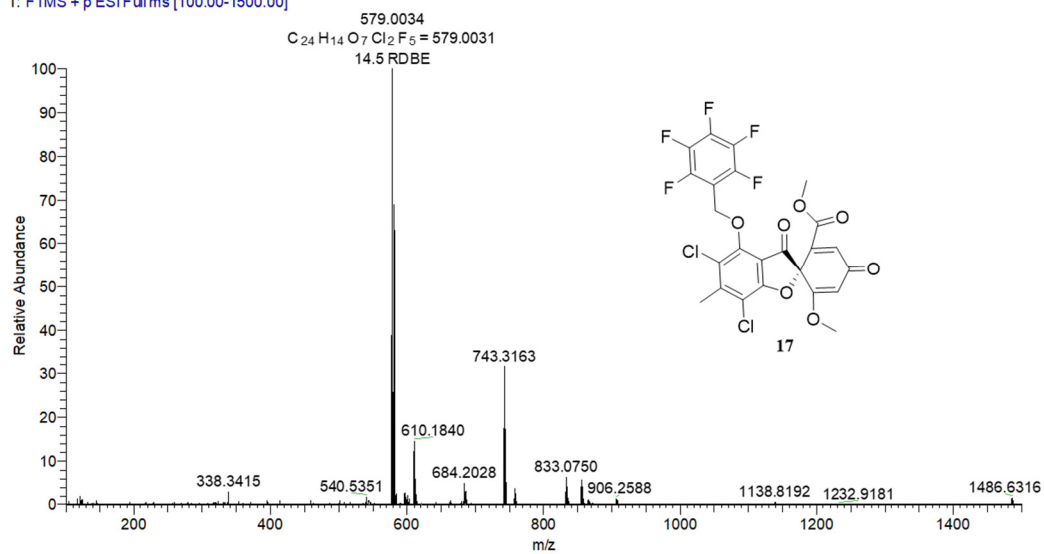

Figure S51. HRESIMS spectrum of compound 17

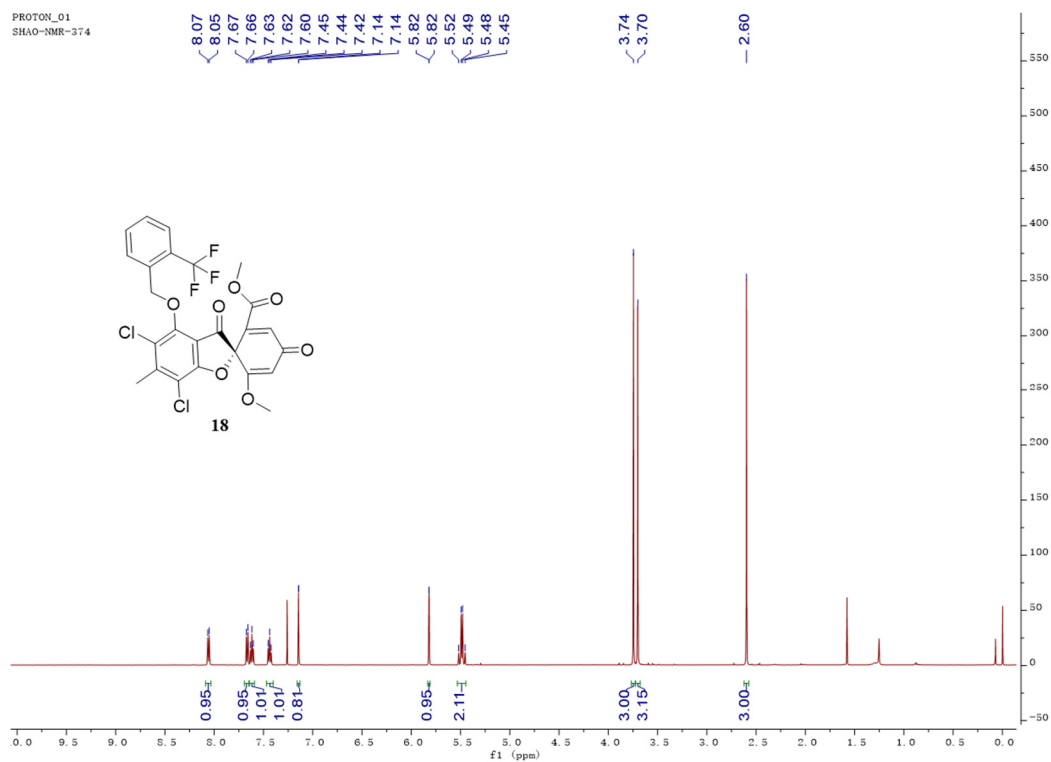

Figure S52. <sup>1</sup>H NMR (500 MHz, CDCl<sub>3</sub>) spectrum of compound 18

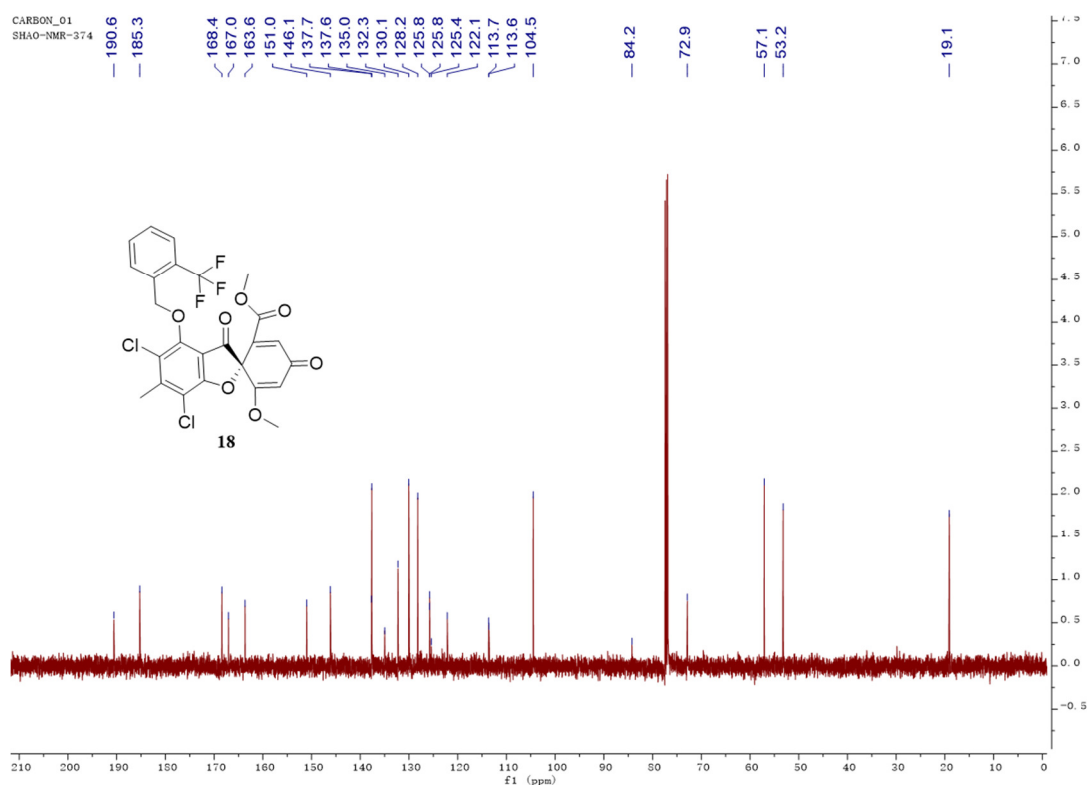

**Figure S53.**  $^{13}\text{C}$  NMR (125 MHz,  $\text{CDCl}_3$ ) spectrum of compound **18**

CHNQD-02126 #524 RT: 5.06 AV: 1 NL: 1.01E9  
T: FTMS - p ESI Full ms [100.00-1500.00]

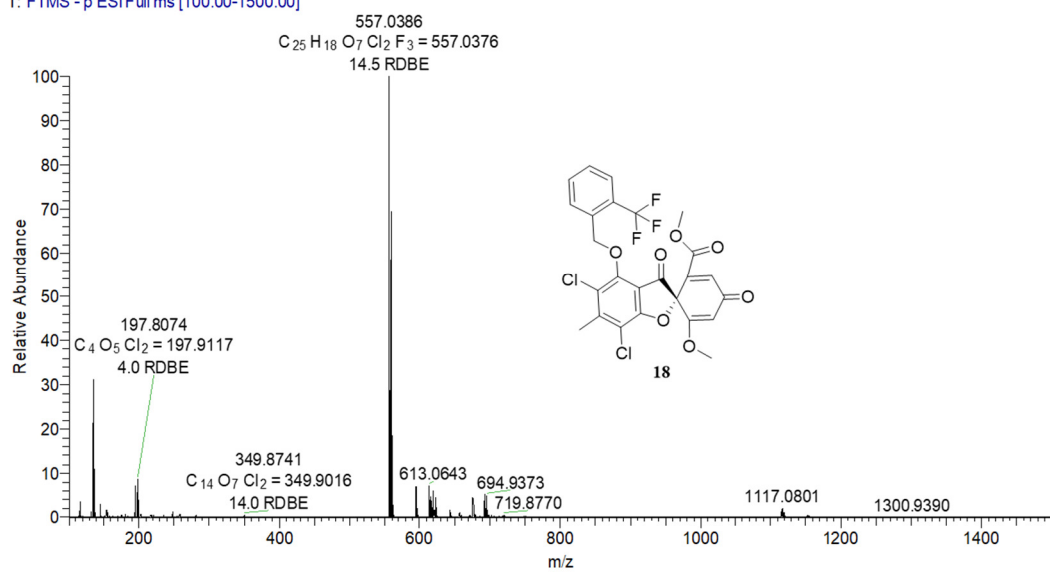

**Figure S54.** HRESIMS spectrum of compound **18**

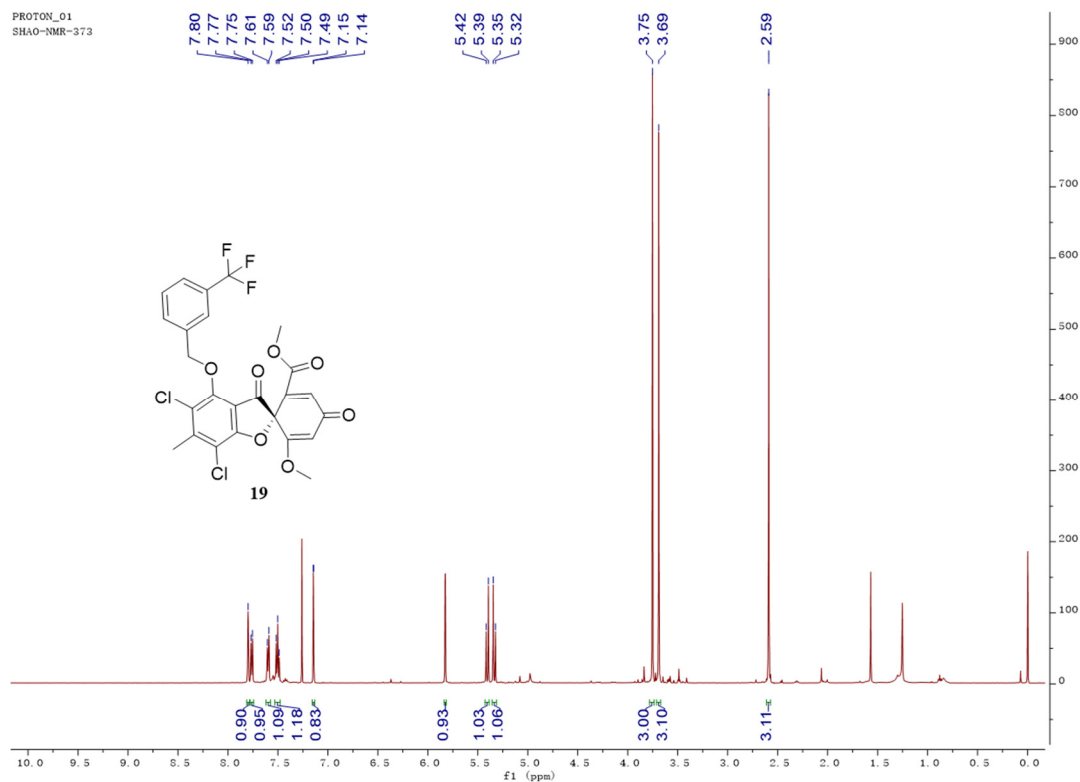

**Figure S55.** <sup>1</sup>H NMR (500 MHz, CDCl<sub>3</sub>) spectrum of compound **19**

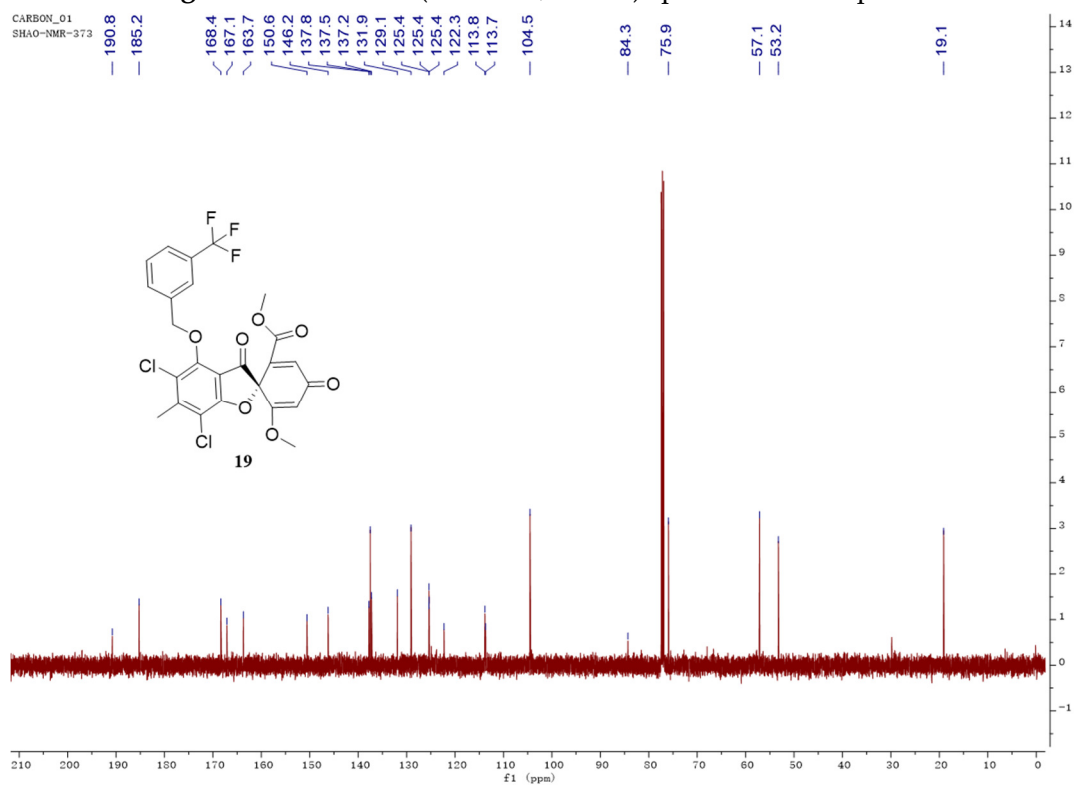

**Figure S56.** <sup>13</sup>C NMR (125 MHz, CDCl<sub>3</sub>) spectrum of compound **19**

CHNQD-02125 #529 RT: 5.10 AV: 1 NL: 3.70E8  
T: FTMS + p ESI Full ms [100.00-1500.00]

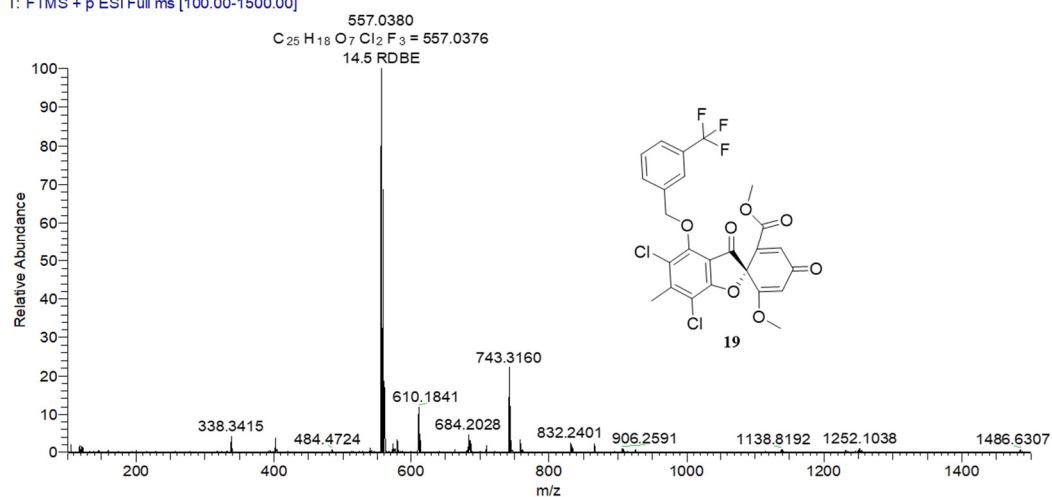

Figure S57. HRESIMS spectrum of compound 19

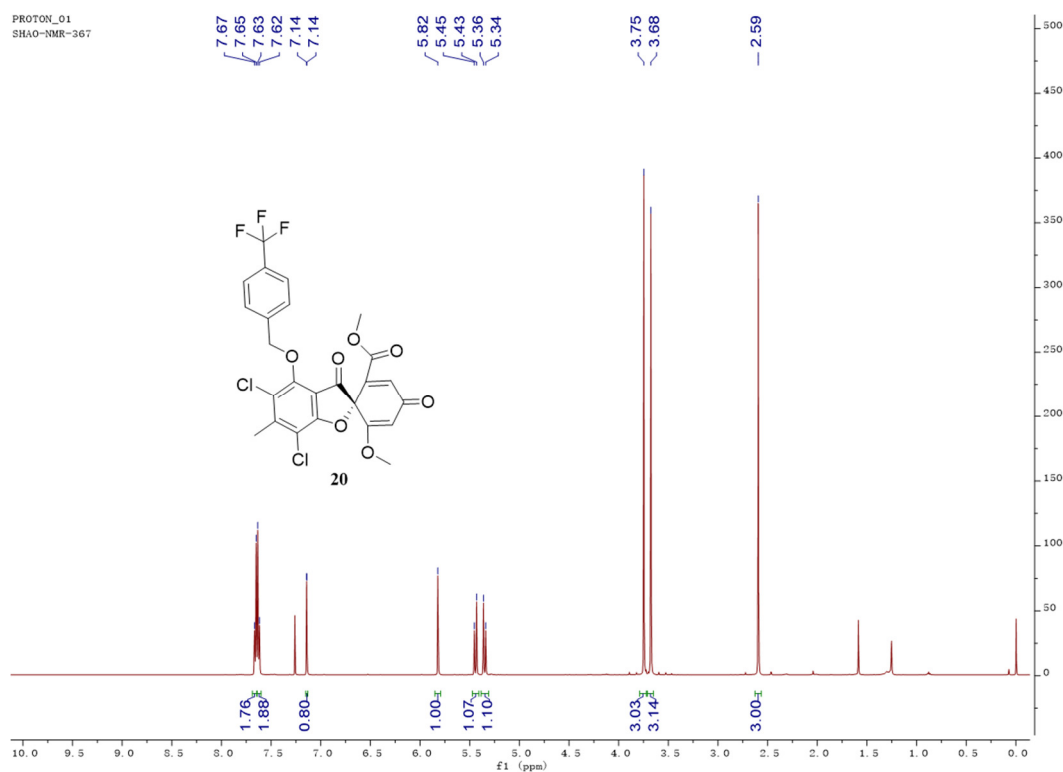

Figure S58.  $^1H$  NMR (500 MHz,  $CDCl_3$ ) spectrum of compound 20

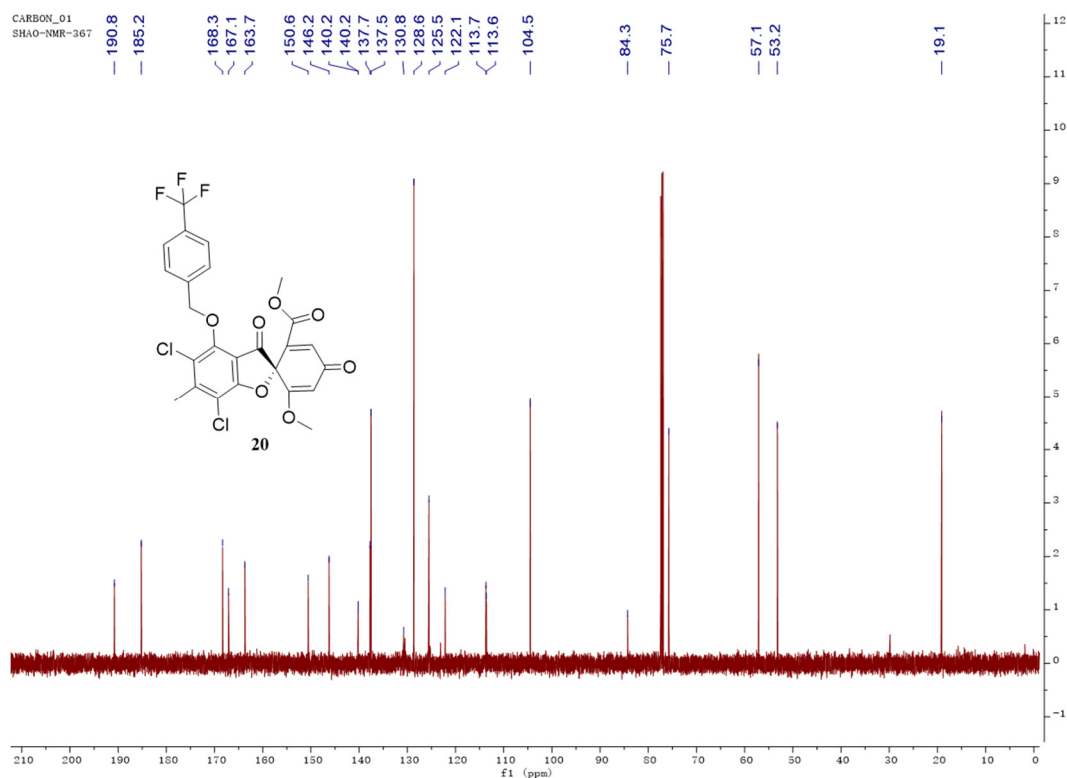

**Figure S59.**  $^{13}\text{C}$  NMR (125 MHz,  $\text{CDCl}_3$ ) spectrum of compound **20**

CHNQD-02119 #537 RT: 5.19 AV: 1 NL: 4.12E8  
T: FTMS + p ESI Full ms [100.00-1500.00]

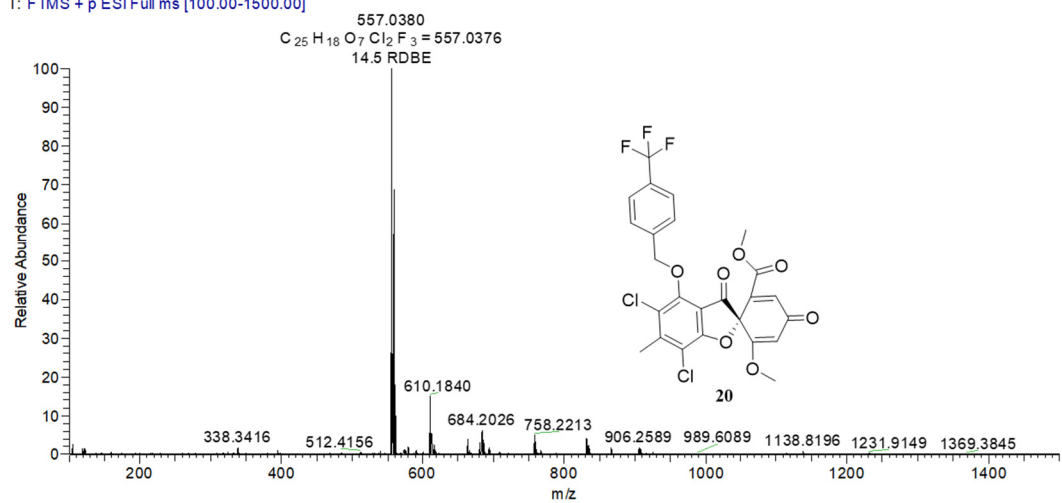

**Figure S60.** HRESIMS spectrum of compound **20**

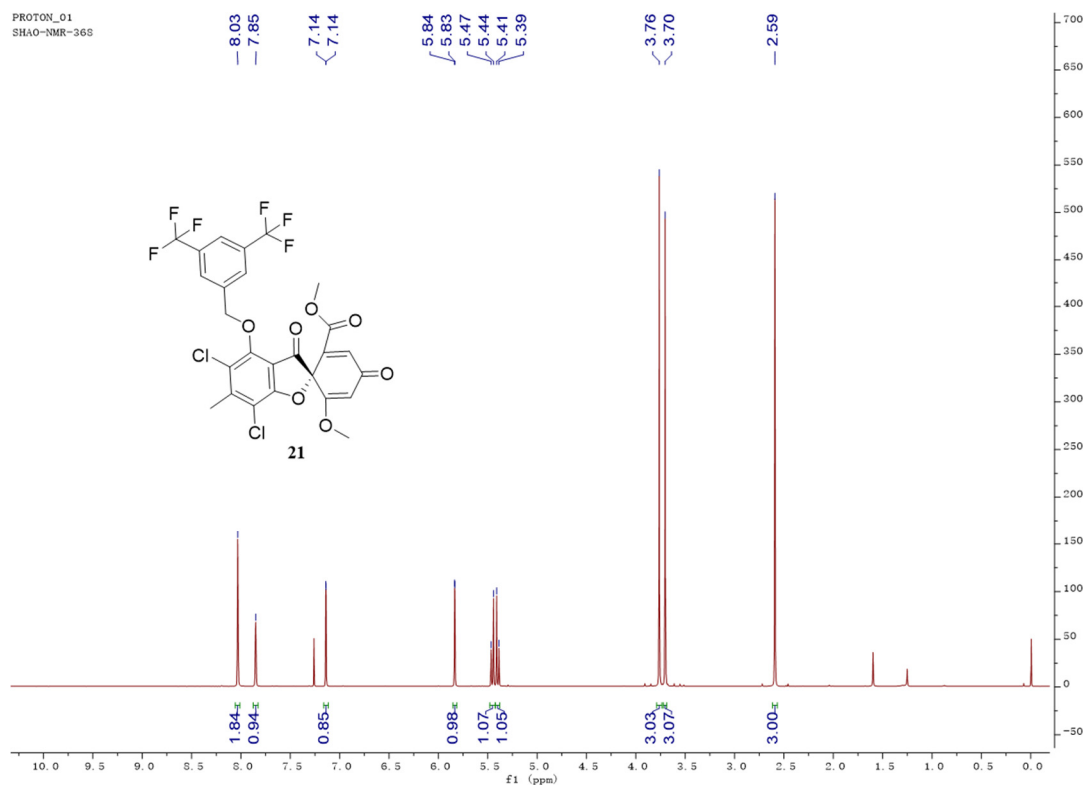

**Figure S61.**  $^1\text{H}$  NMR (500 MHz,  $\text{CDCl}_3$ ) spectrum of compound **21**

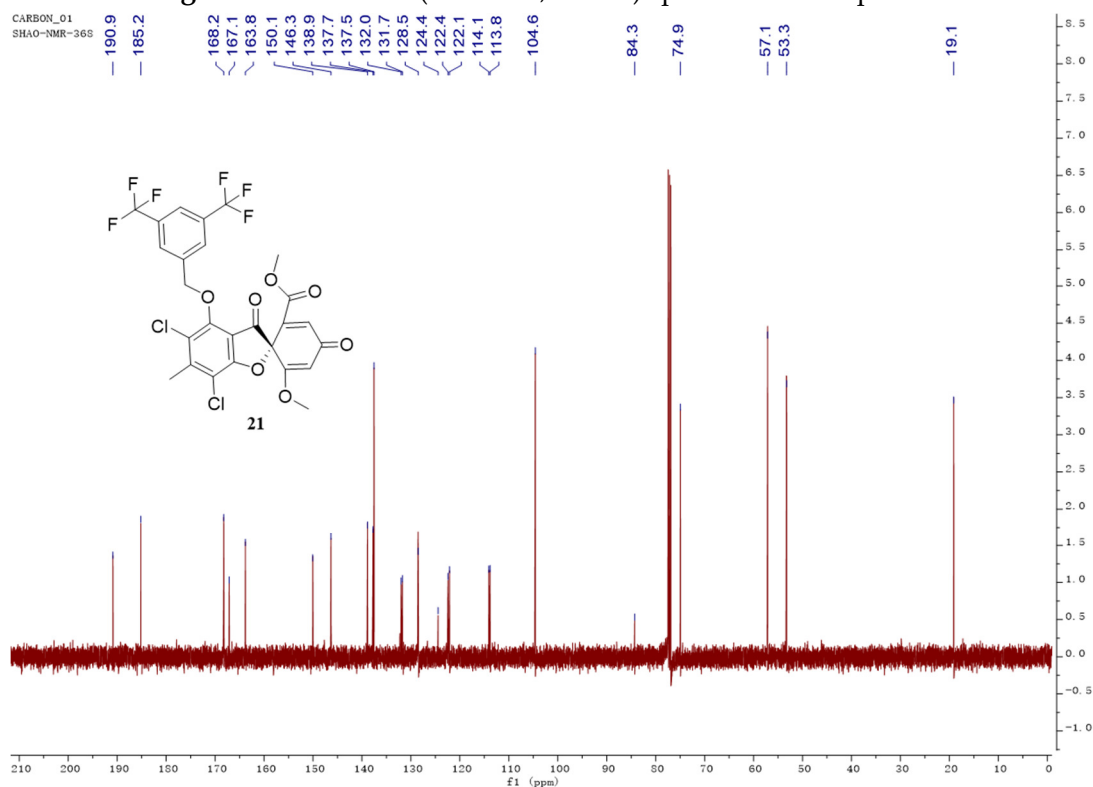

**Figure S62.**  $^{13}\text{C}$  NMR (125 MHz,  $\text{CDCl}_3$ ) spectrum of compound **21**

CHNQD-02120 #569 RT: 5.49 AV: 1 NL: 3.01E8  
T: FTMS + p ESI/Full ms [100.00-1500.00]

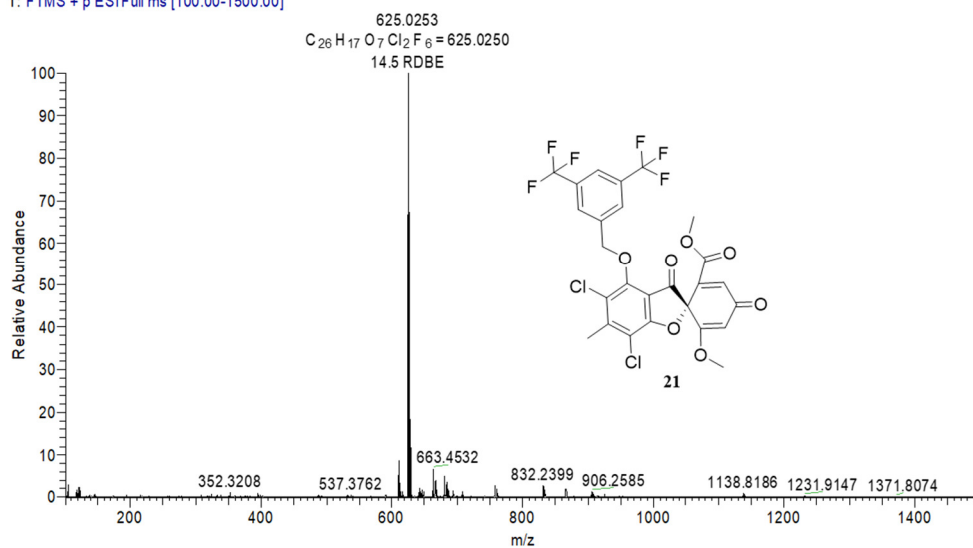

Figure S63. HRESIMS spectrum of compound 21

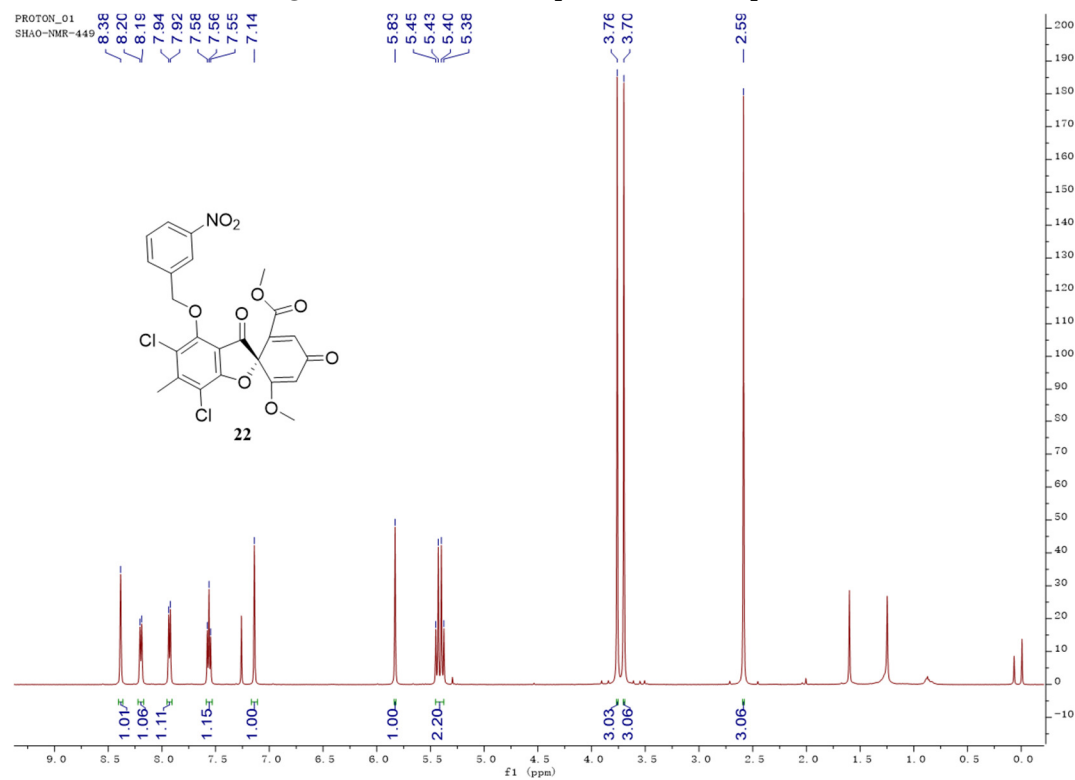

Figure S64. <sup>1</sup>H NMR (500 MHz, CDCl<sub>3</sub>) spectrum of compound 22



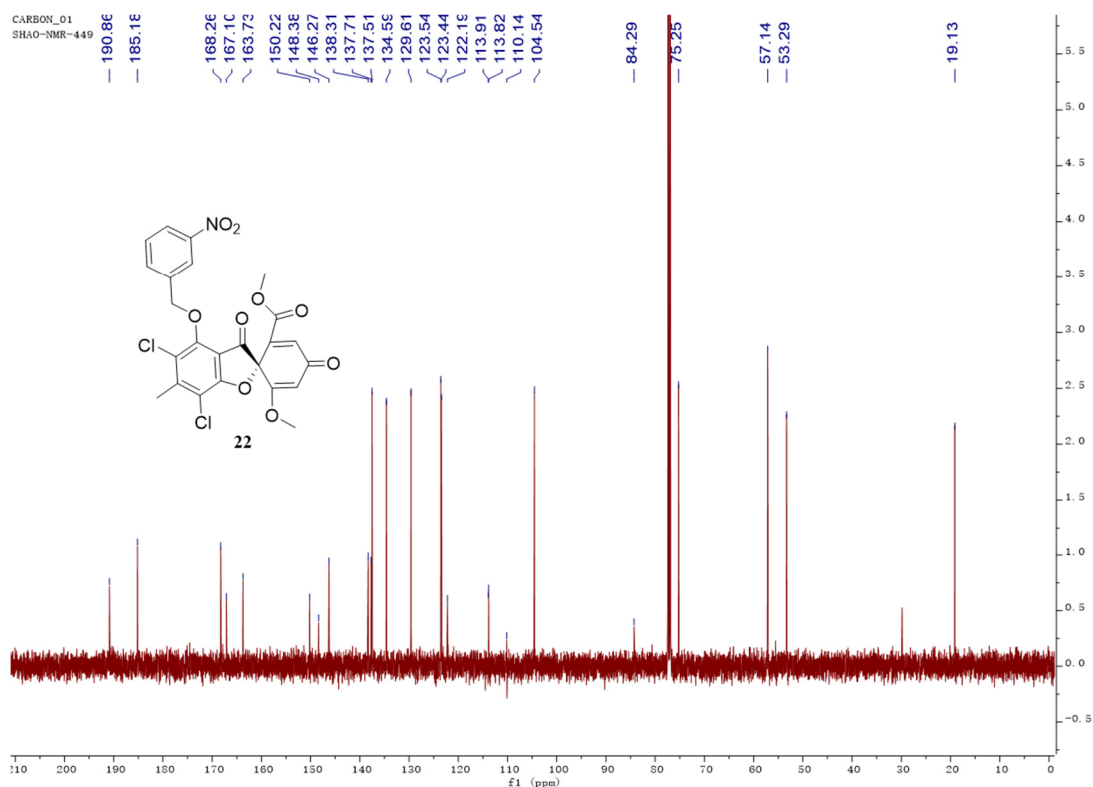

**Figure S65.**  $^{13}\text{C}$  NMR (125 MHz,  $\text{CDCl}_3$ ) spectrum of compound 22

20201106-CHNQ-02146\_20110608394S #13 RT: 0.33 AV: 1 NL: 1.37E7  
T: FTMS + p ESI Full ms [100.00-2000.00]

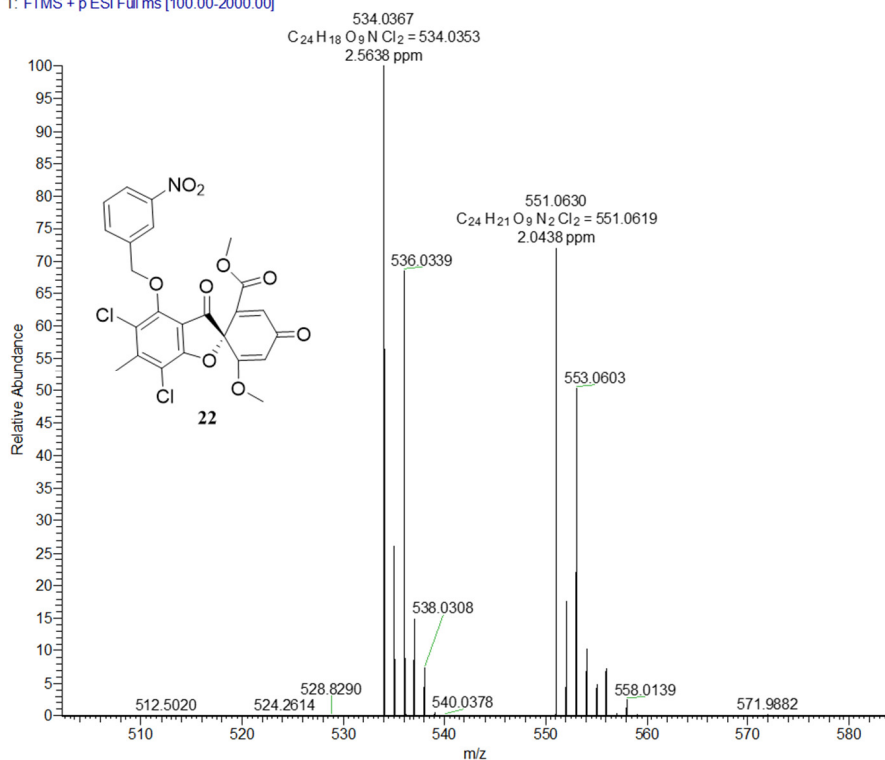

**Figure S66.** HRESIMS spectrum of compound 22

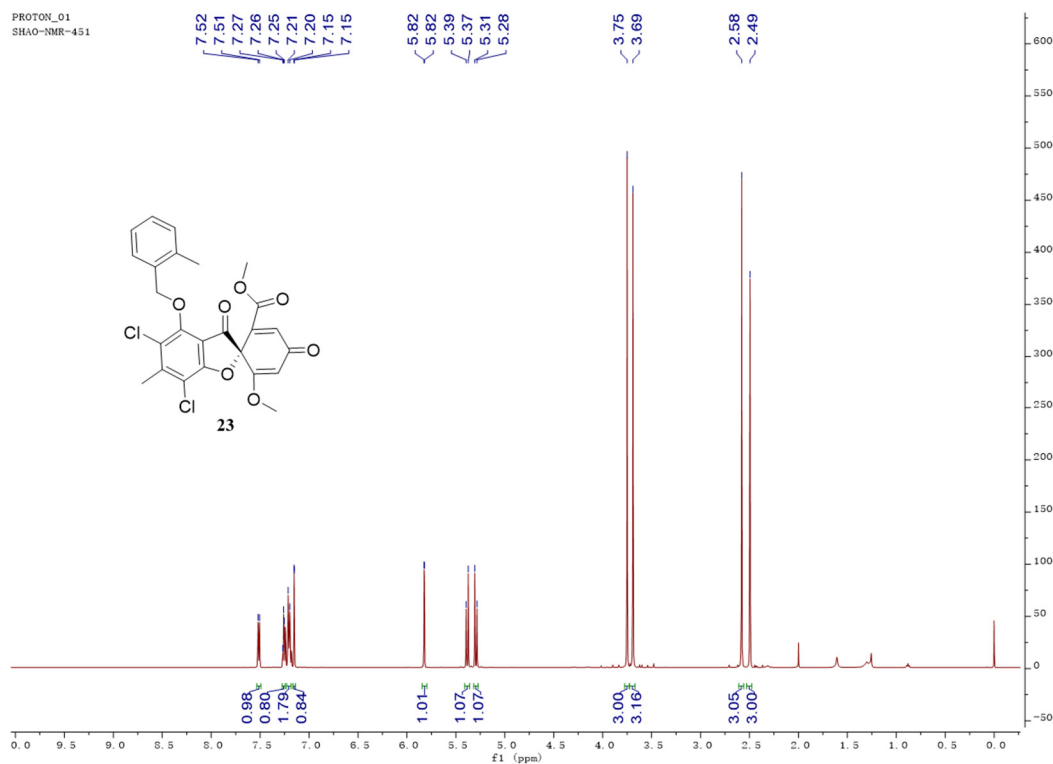

**Figure S67.** <sup>1</sup>H NMR (500 MHz, CDCl<sub>3</sub>) spectrum of compound **23**

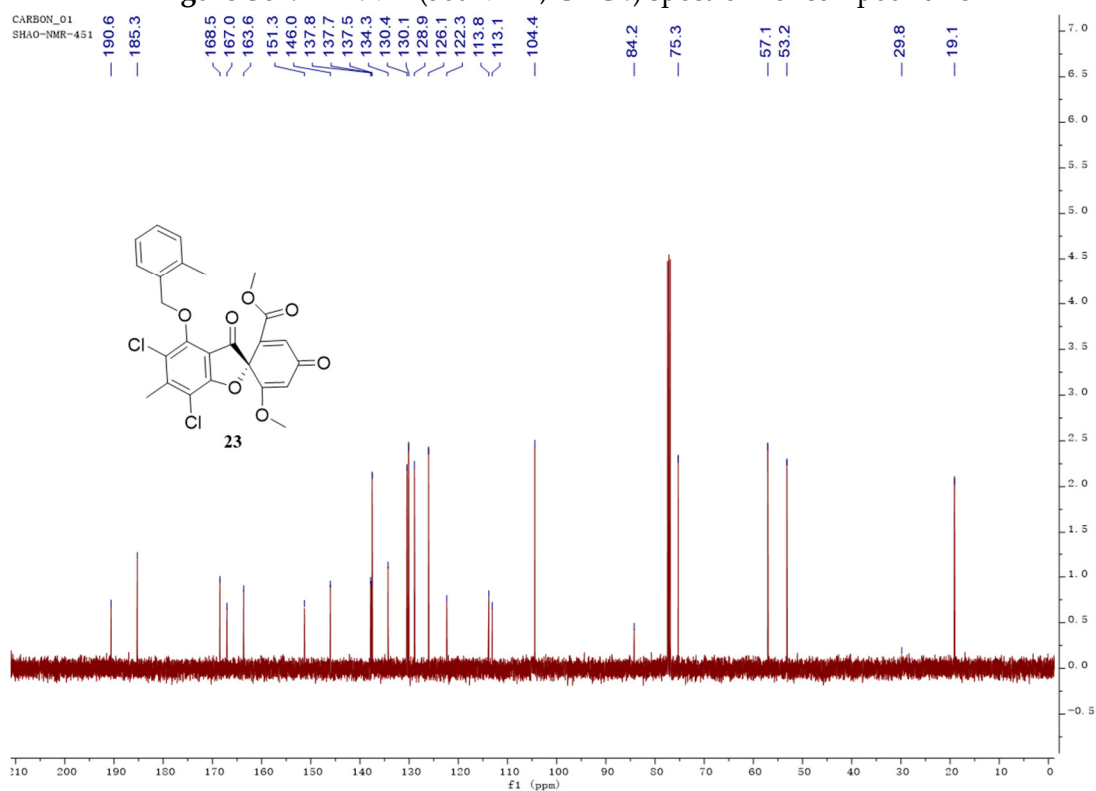

**Figure S68.** <sup>13</sup>C NMR (125 MHz, CDCl<sub>3</sub>) spectrum of compound **23**

2021106-CHNQ-02149\_201106083949 #18-19 RT: 0.47-0.50 AV: 2 NL: 5.86E6  
T: FTMS + p ESI Full ms [100.00-2000.00]

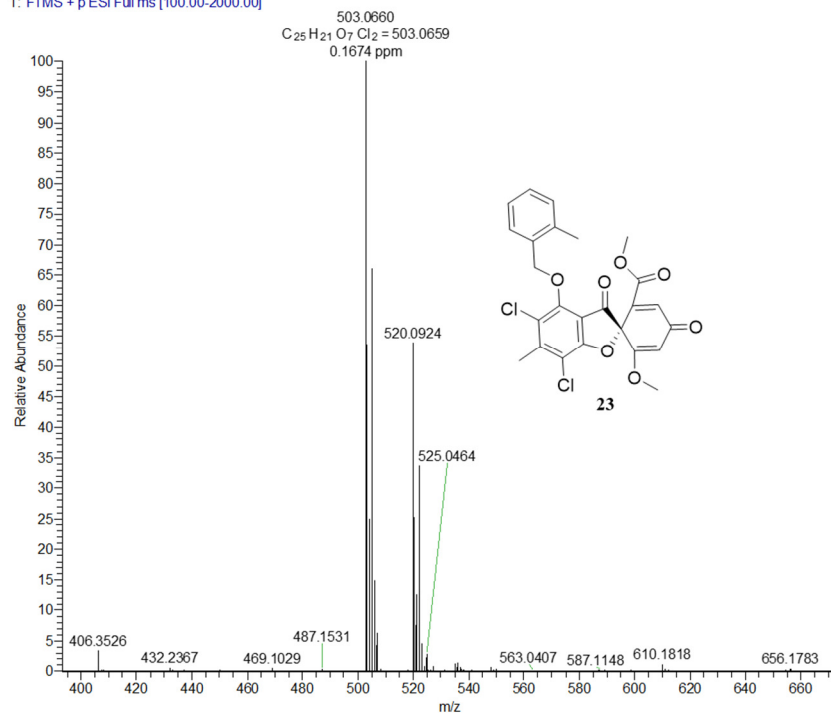

Figure S69. HRESIMS spectrum of compound 23

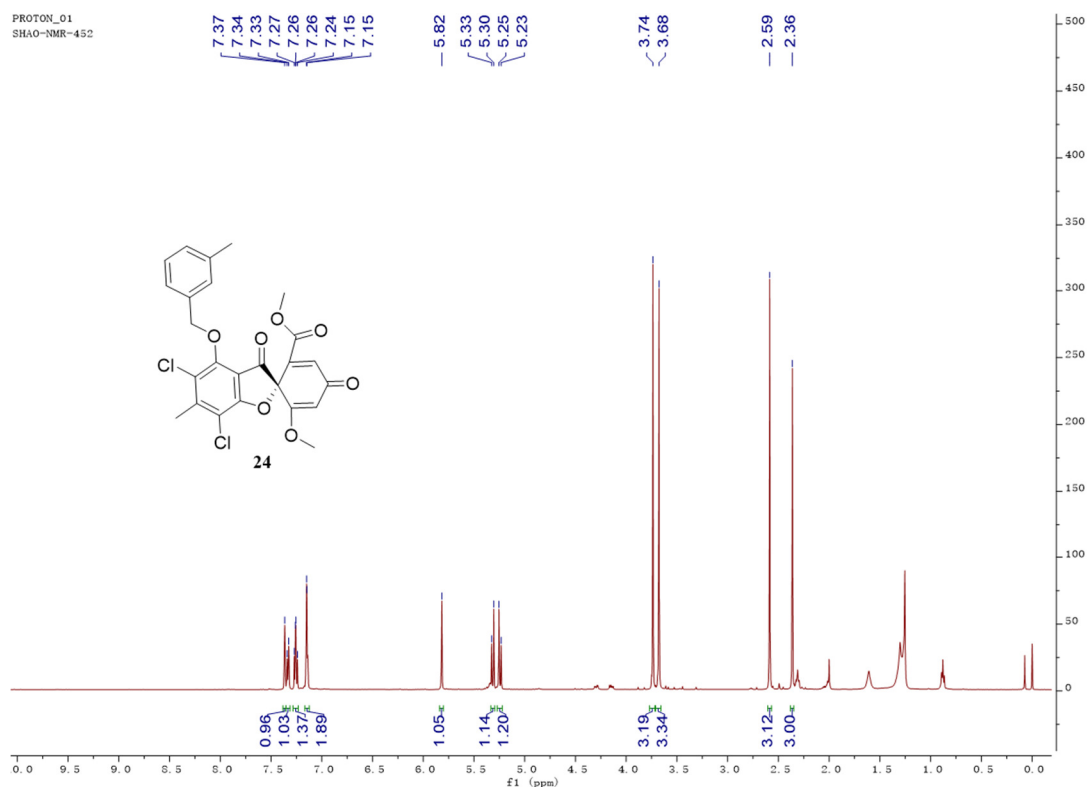

Figure S70. <sup>1</sup>H NMR (500 MHz, CDCl<sub>3</sub>) spectrum of compound 24

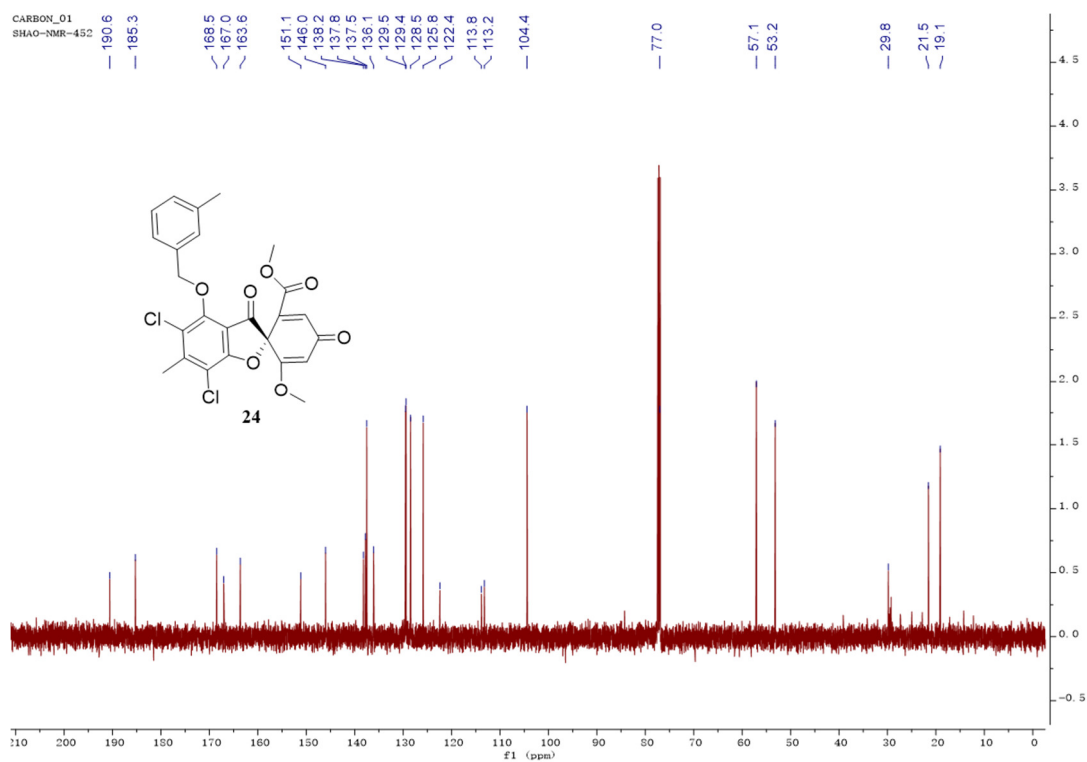

**Figure S71.**  $^{13}\text{C}$  NMR (125 MHz,  $\text{CDCl}_3$ ) spectrum of compound 24

20201106-CHNQ-02150\_201106083949 #29-30 RT: 0.81-0.84 AV: 2 NL: 9.53E6  
T: FTMS + p ESI Full ms [100.00-2000.00]

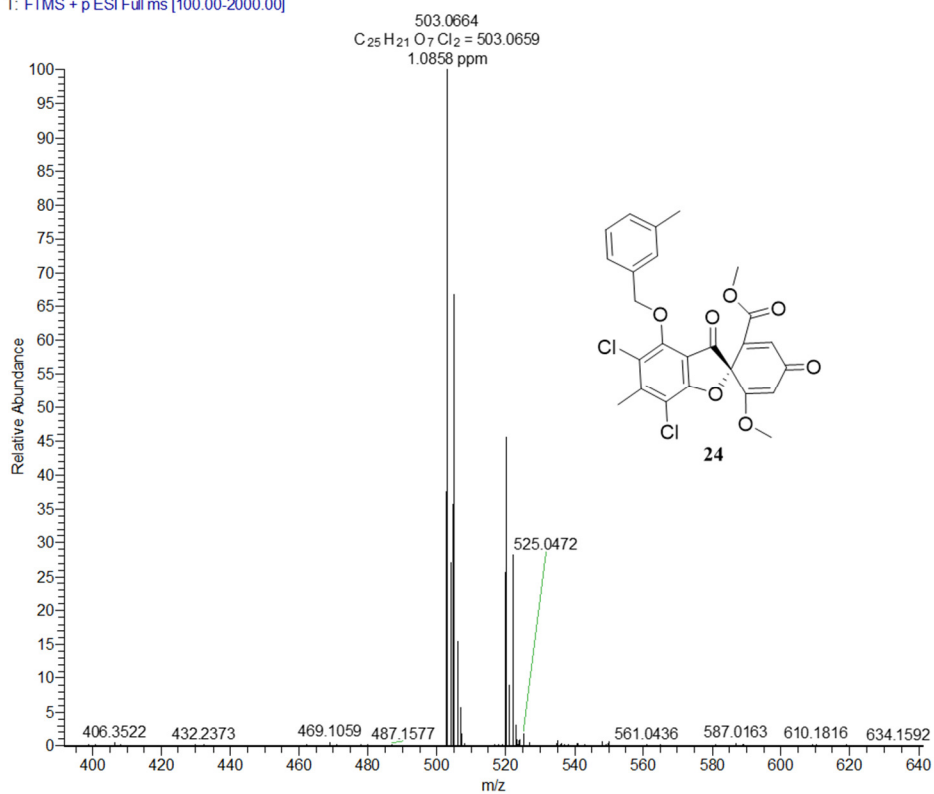

**Figure S72.** HRESIMS spectrum of compound 24

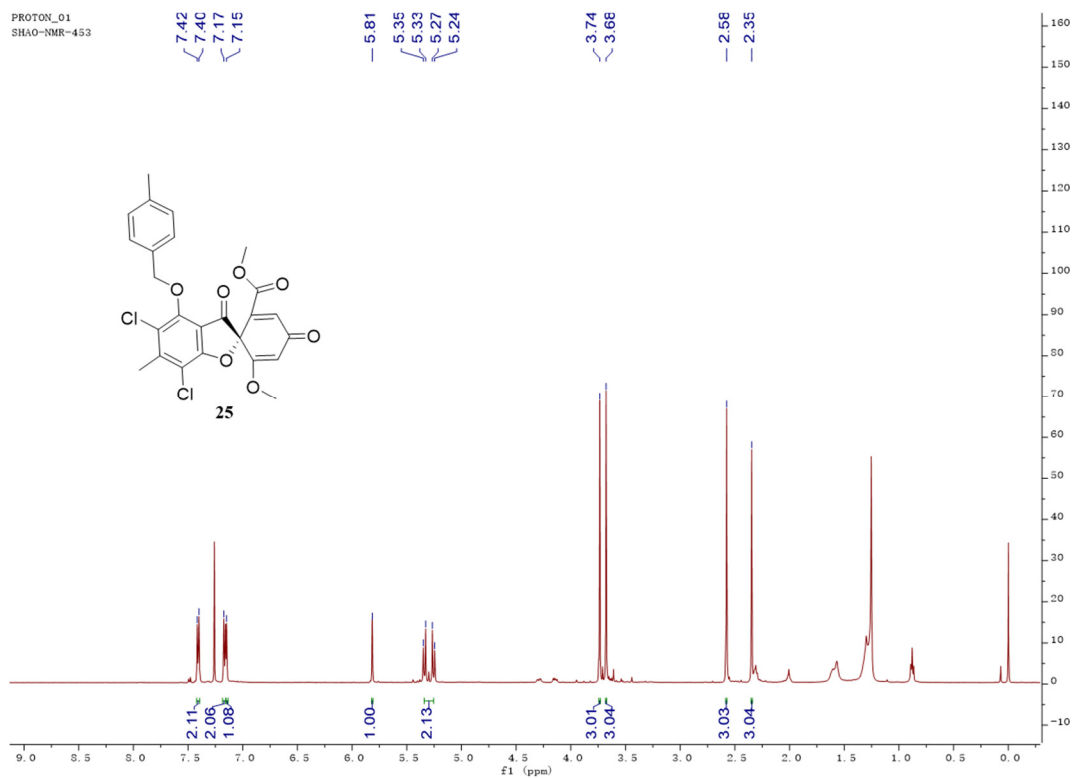

**Figure S73.**  $^1\text{H}$  NMR (500 MHz,  $\text{CDCl}_3$ ) spectrum of compound 25

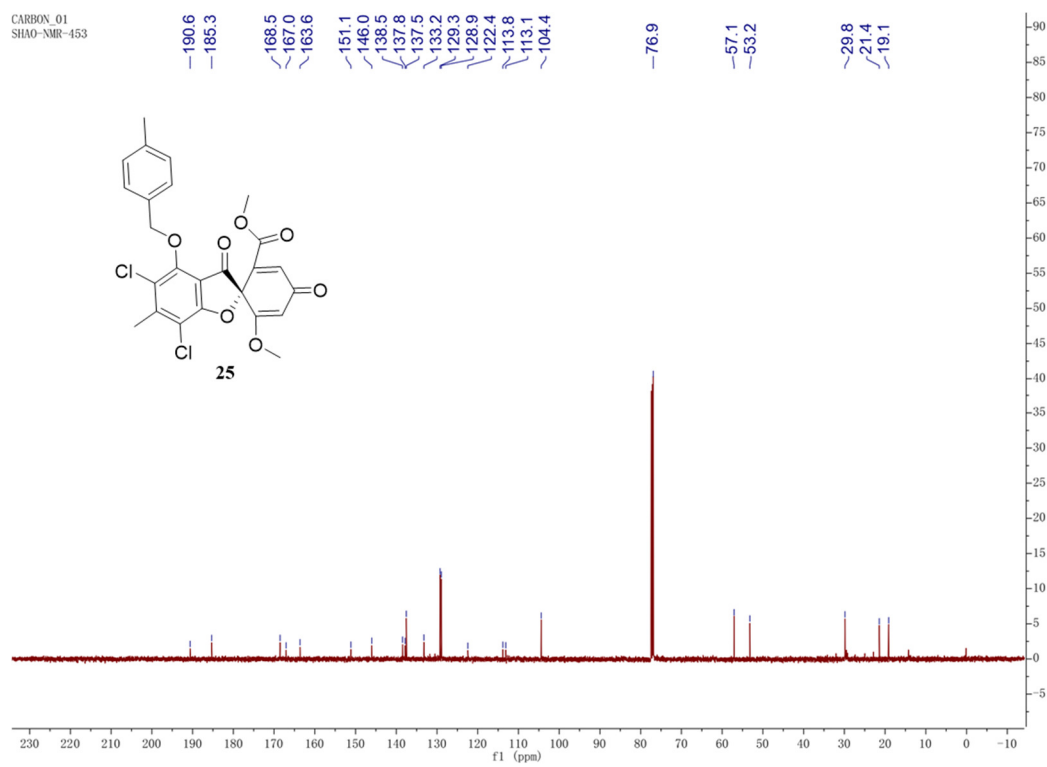

**Figure S74.**  $^{13}\text{C}$  NMR (125 MHz,  $\text{CDCl}_3$ ) spectrum of compound 25

20201106-CHNQ-02151\_201106083949 #16-17 RT: 0.44-0.47 AV: 2 NL: 9.28E6  
T: FTMS + p ESI Full ms [100.00-2000.00]

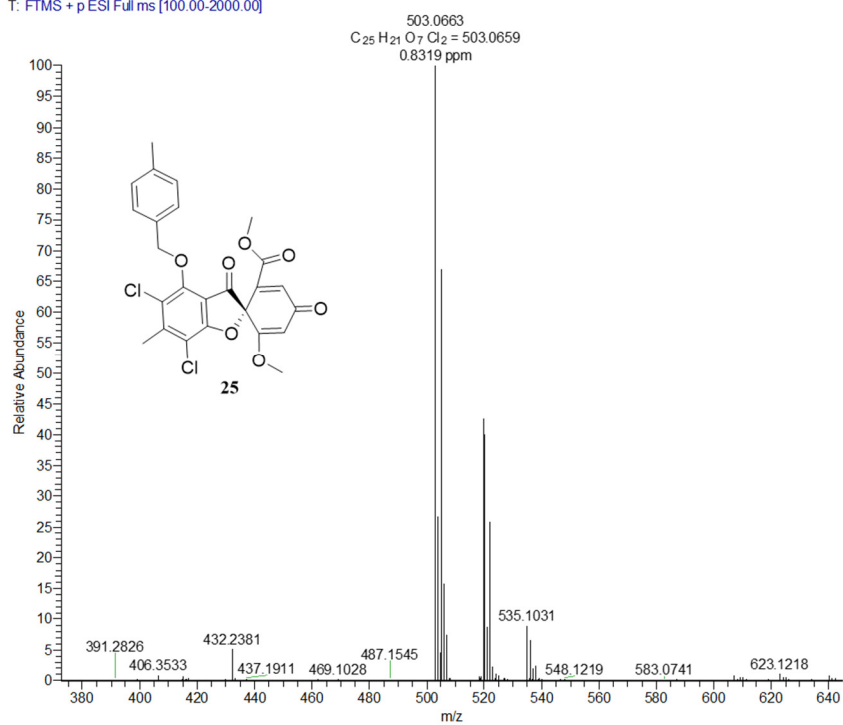

Figure S75. HRESIMS spectrum of compound 25

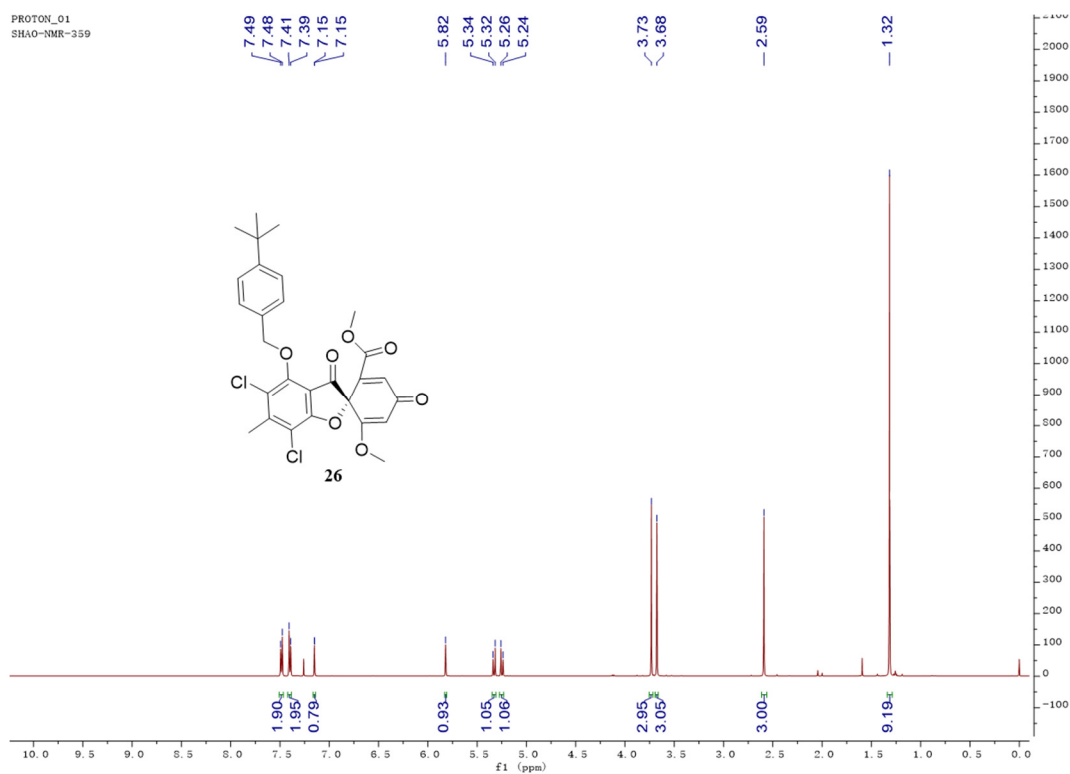

Figure S76. <sup>1</sup>H NMR (500 MHz, CDCl<sub>3</sub>) spectrum of compound 26

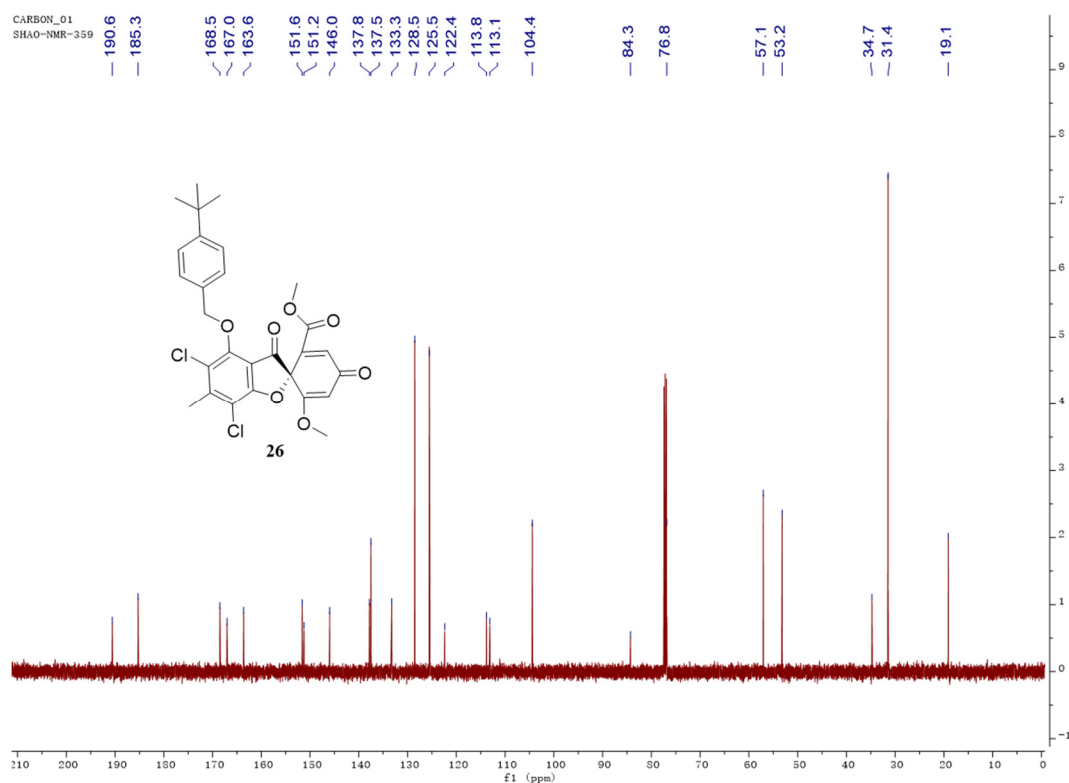

**Figure S77.**  $^{13}\text{C}$  NMR (125 MHz,  $\text{CDCl}_3$ ) spectrum of compound 26

CHNQD-02113 #593 RT: 5.71 AV: 1 NL: 7.26E8  
T: FTMS + p ESI Full ms [100.00-1500.00]

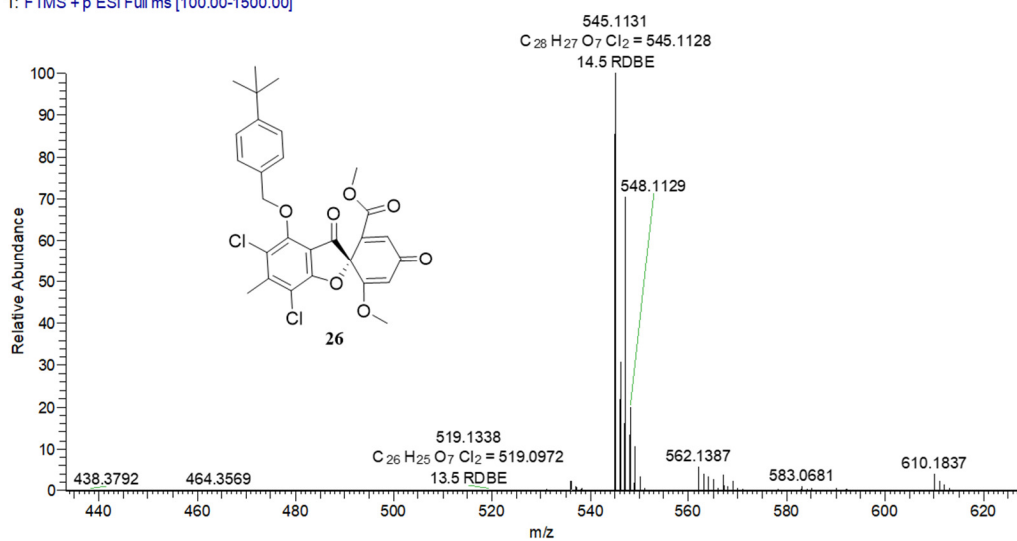

**Figure S78.** HRESIMS spectrum of compound 26

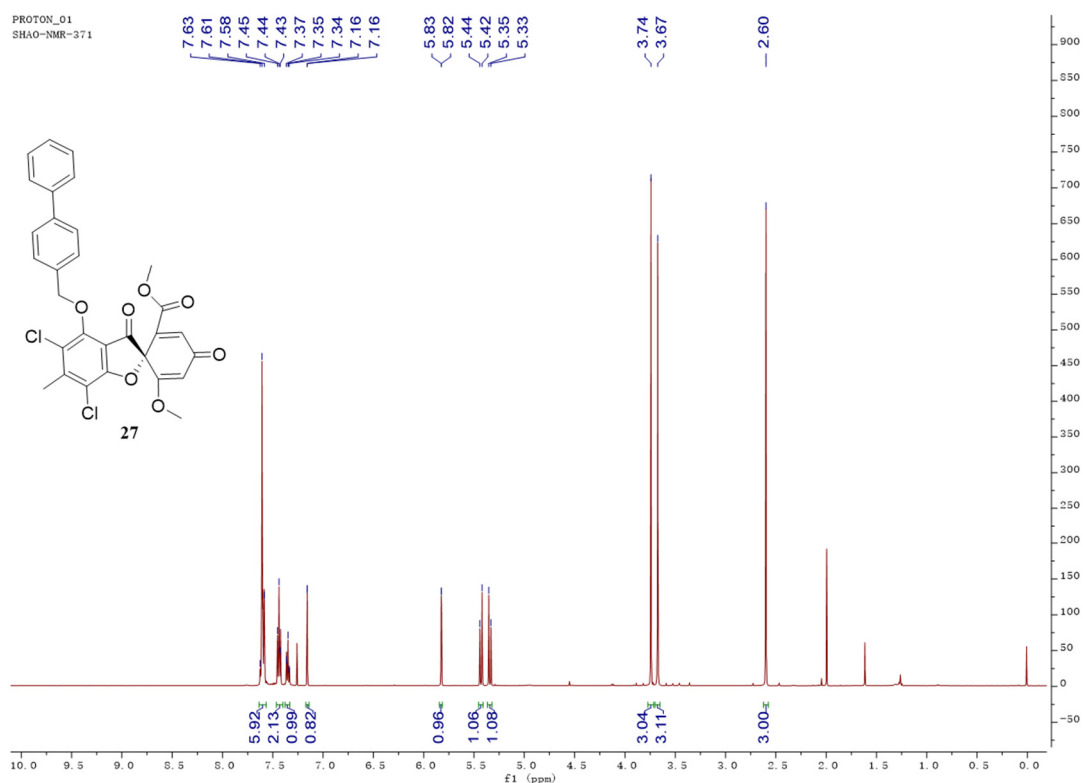

**Figure S79.**  $^1\text{H}$  NMR (500 MHz,  $\text{CDCl}_3$ ) spectrum of compound 27

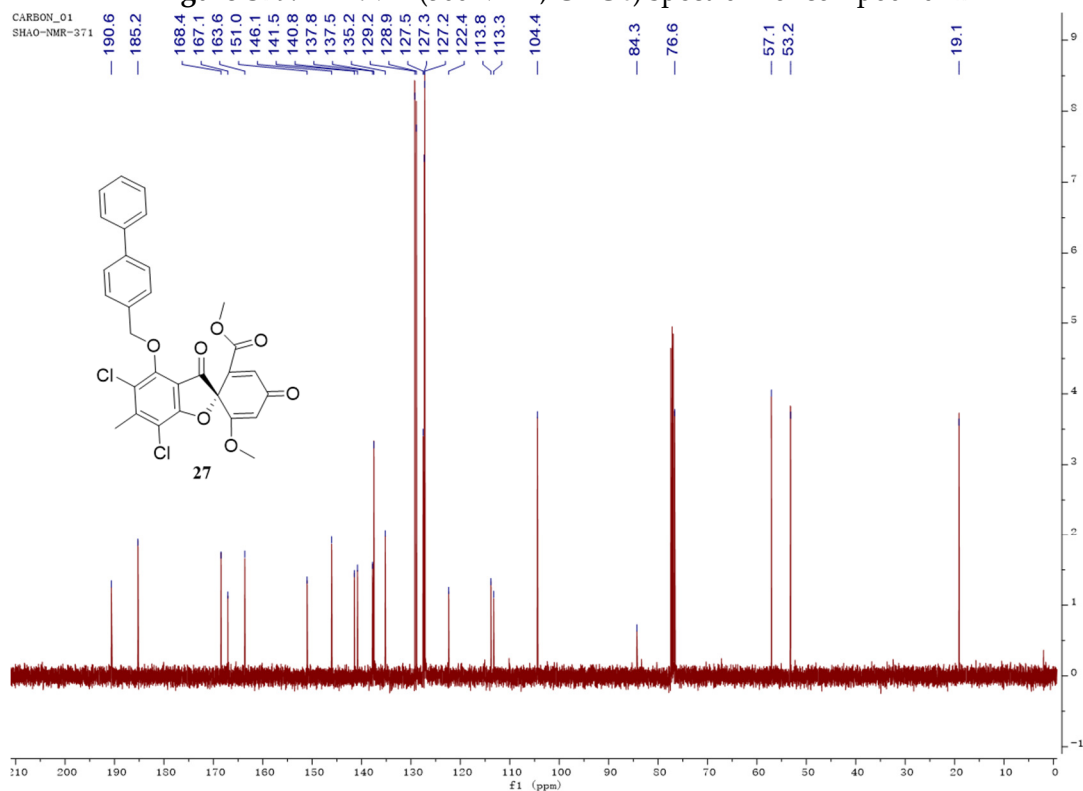

**Figure S80.**  $^{13}\text{C}$  NMR (125 MHz,  $\text{CDCl}_3$ ) spectrum of compound 27



CHNQD-02123 #567 RT: 5.47 AV: 1 NL: 4.66E8  
T: FTMS + p ESI Full ms [100.00-1500.00]

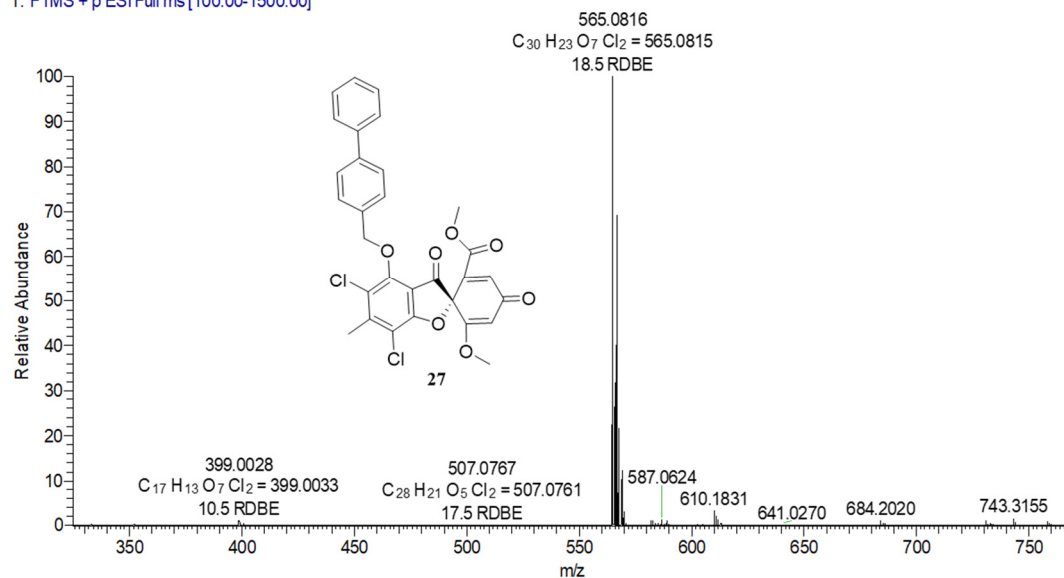

Figure S81. HRESIMS spectrum of compound 27

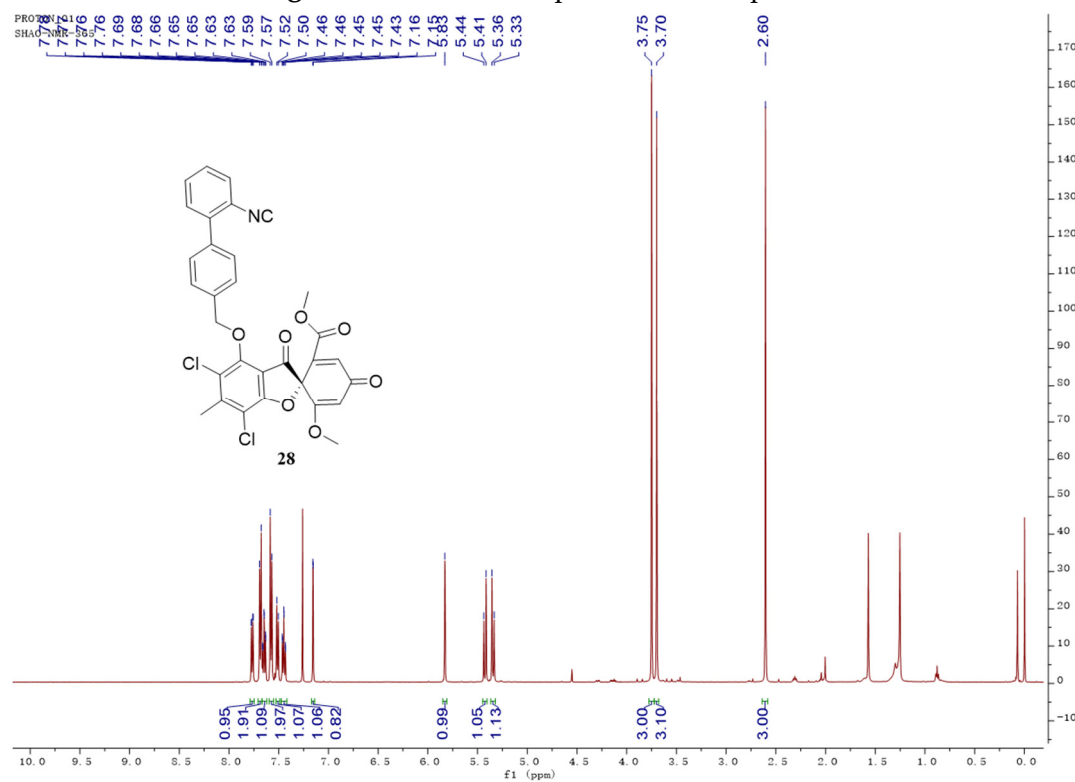

Figure S82. <sup>1</sup>H NMR (500 MHz, CDCl<sub>3</sub>) spectrum of compound 28

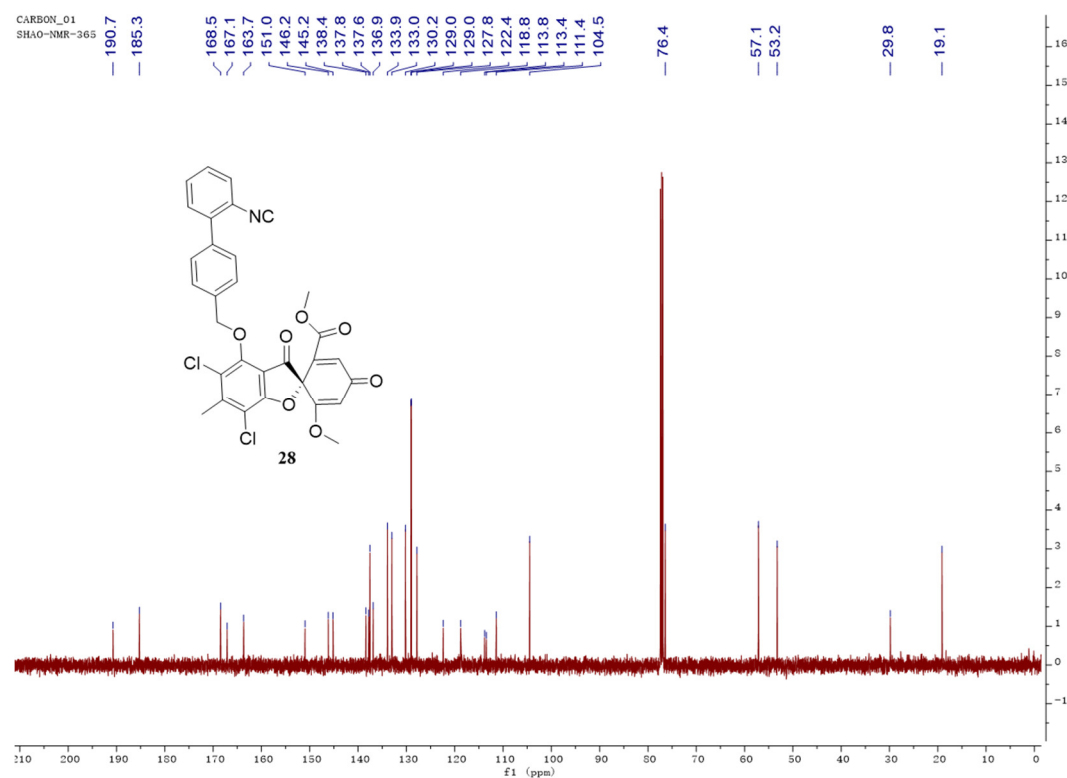

**Figure S83.**  $^{13}\text{C}$  NMR (125 MHz,  $\text{CDCl}_3$ ) spectrum of compound 28

CHNQD-02118 #523 RT: 5.05 AV: 1 NL: 9.52E8  
T: FTMS + p ESIFull ms [100.00-1500.00]

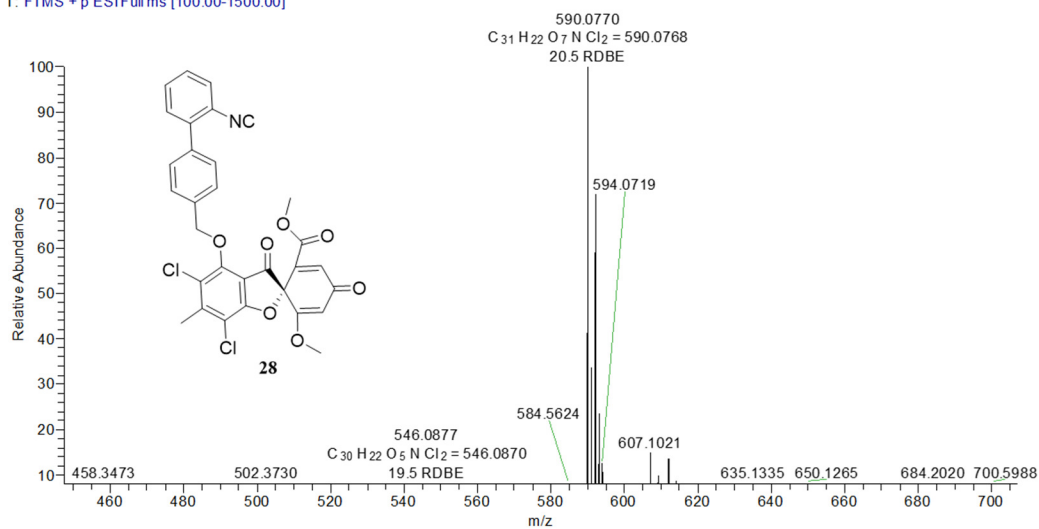

**Figure S84.** HRESIMS spectrum of compound 28

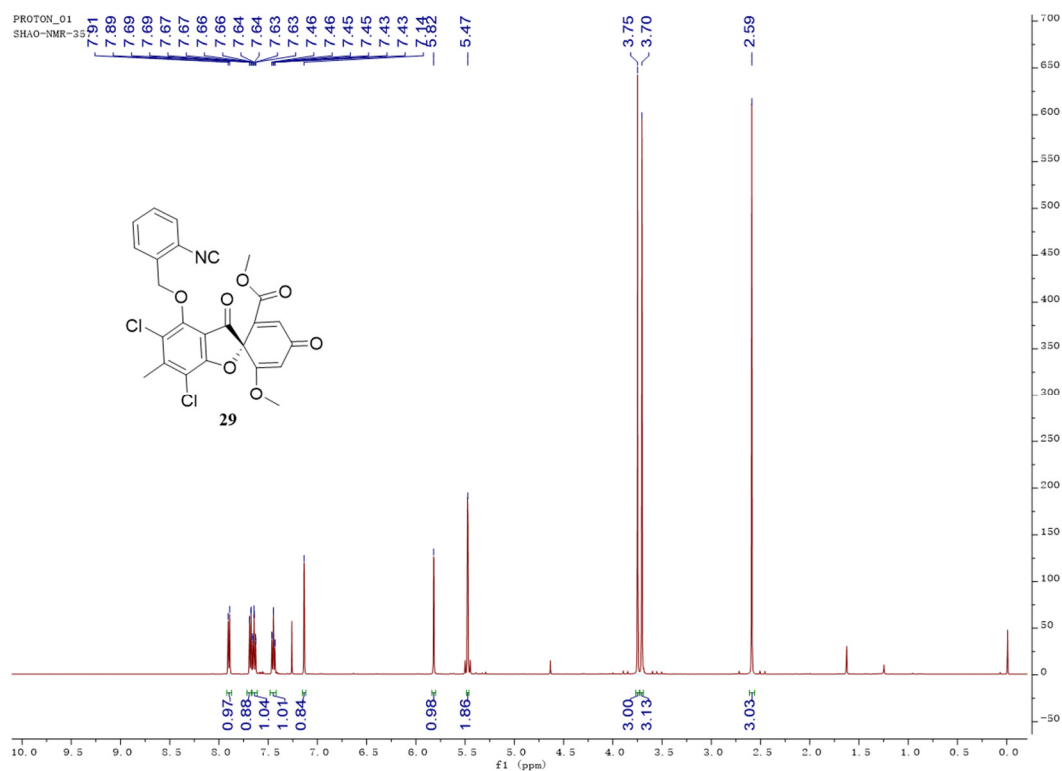

**Figure S85.**  $^1\text{H}$  NMR (500 MHz,  $\text{CDCl}_3$ ) spectrum of compound **29**

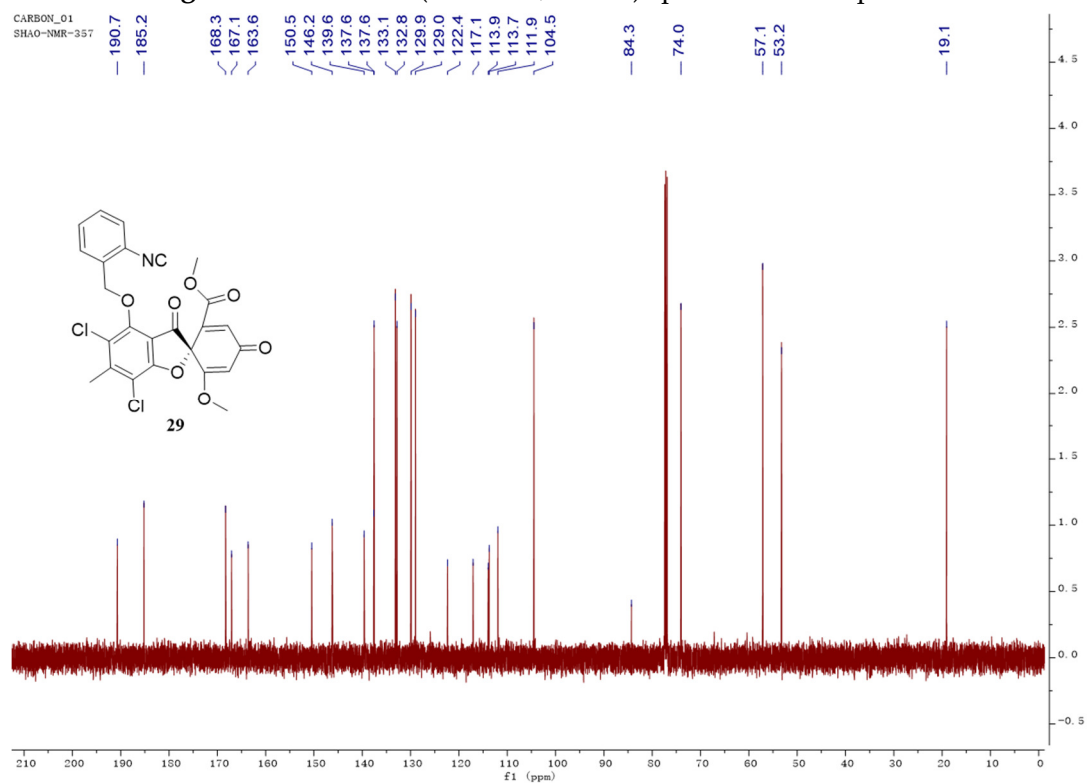

**Figure S86.**  $^{13}\text{C}$  NMR (125 MHz,  $\text{CDCl}_3$ ) spectrum of compound **29**

CHNQD-02112 #477 RT: 4.60 AV: 1 NL: 1.90E9  
T: FTMS + p ESI Fullms [100.00-1500.00]

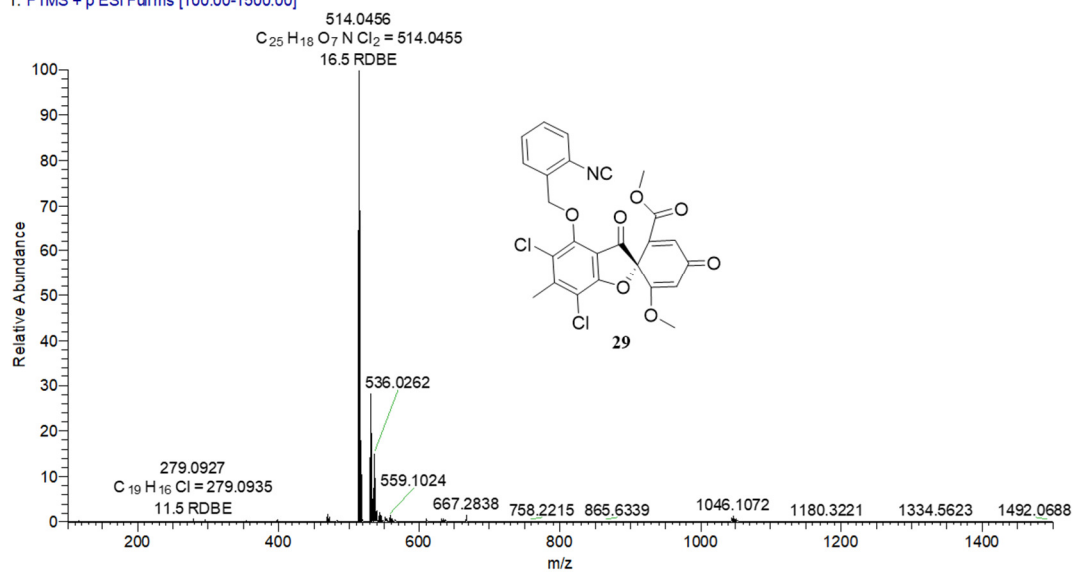

Figure S87. HRESIMS spectrum of compound 29

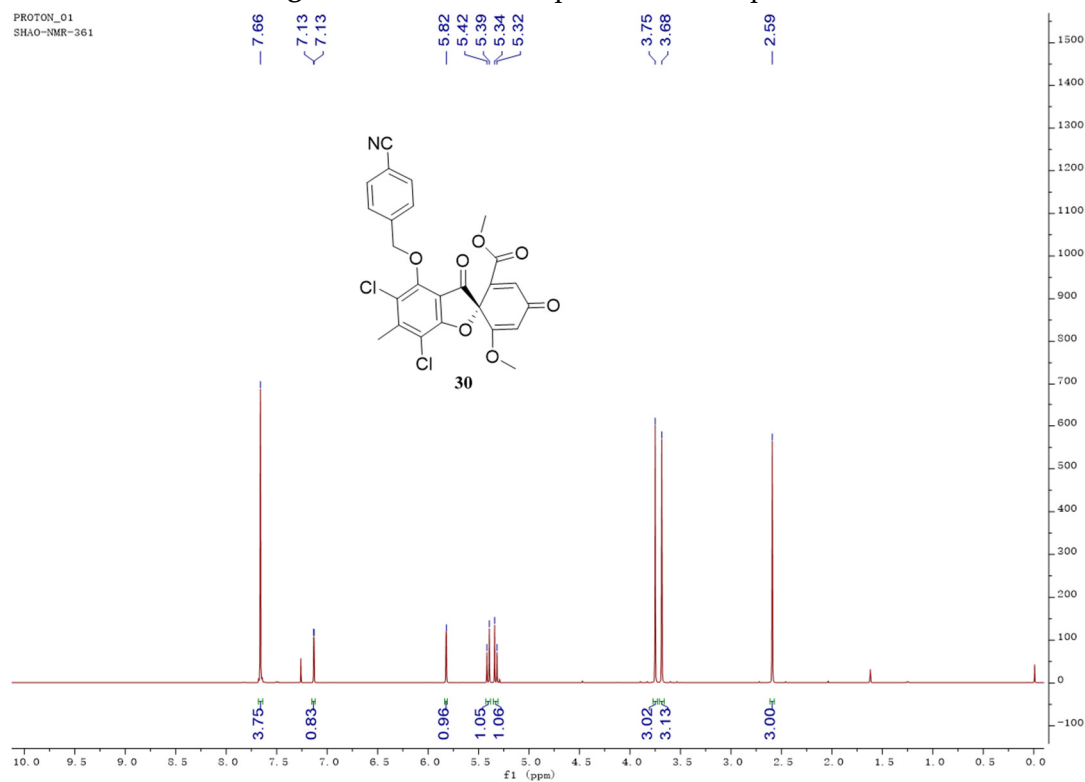

Figure S88.  $^1H$  NMR (500 MHz,  $CDCl_3$ ) spectrum of compound 30

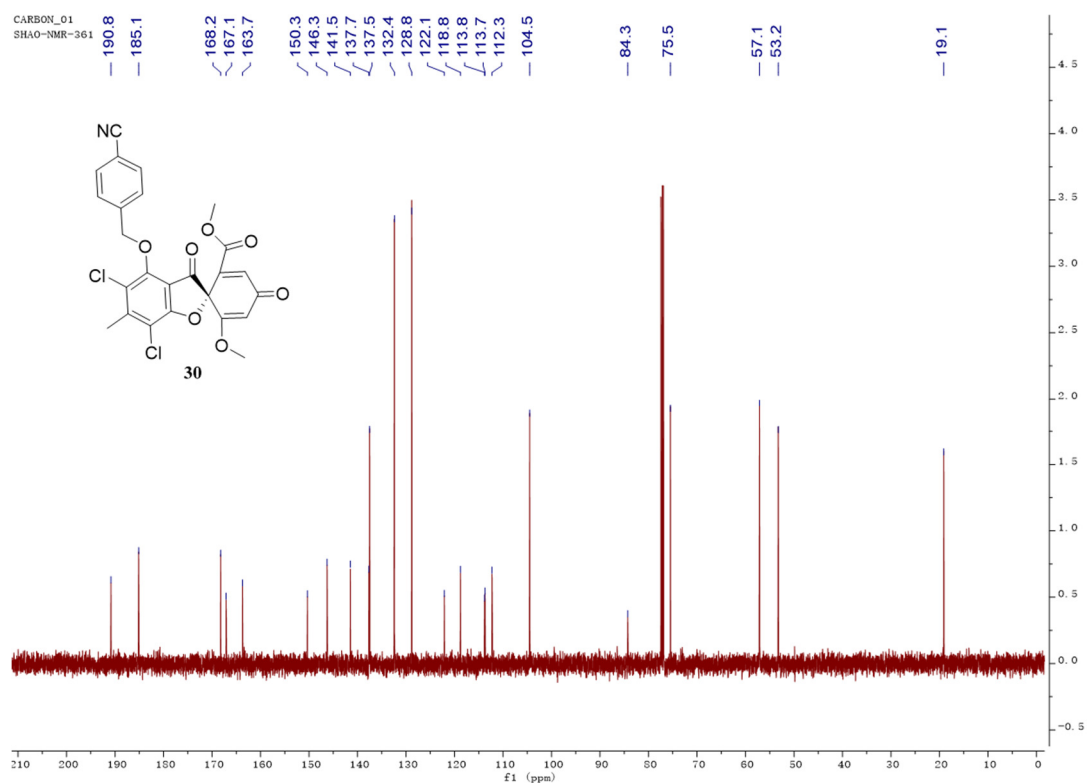

**Figure S89.**  $^{13}\text{C}$  NMR (125 MHz,  $\text{CDCl}_3$ ) spectrum of compound 30

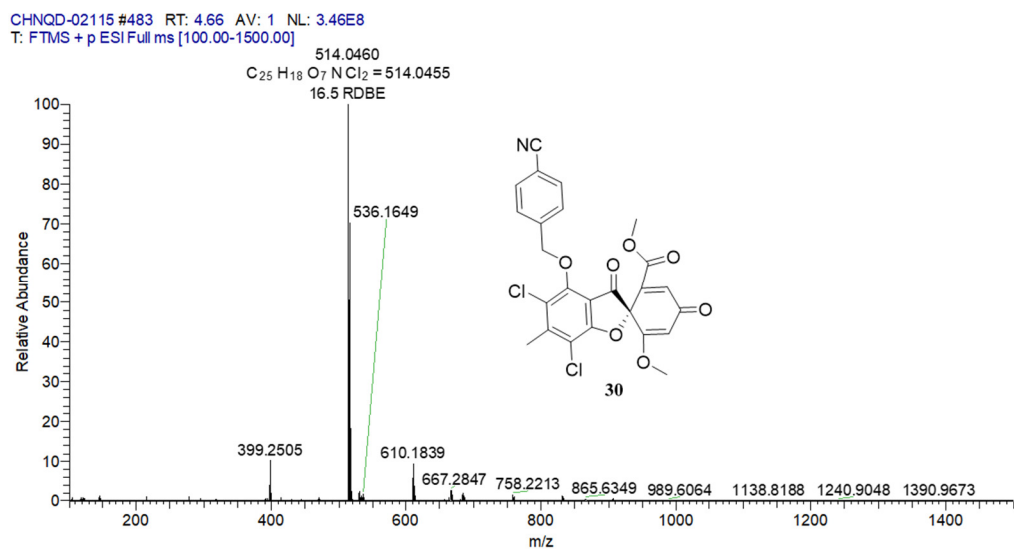

**Figure S90.** HRESIMS spectrum of compound 30

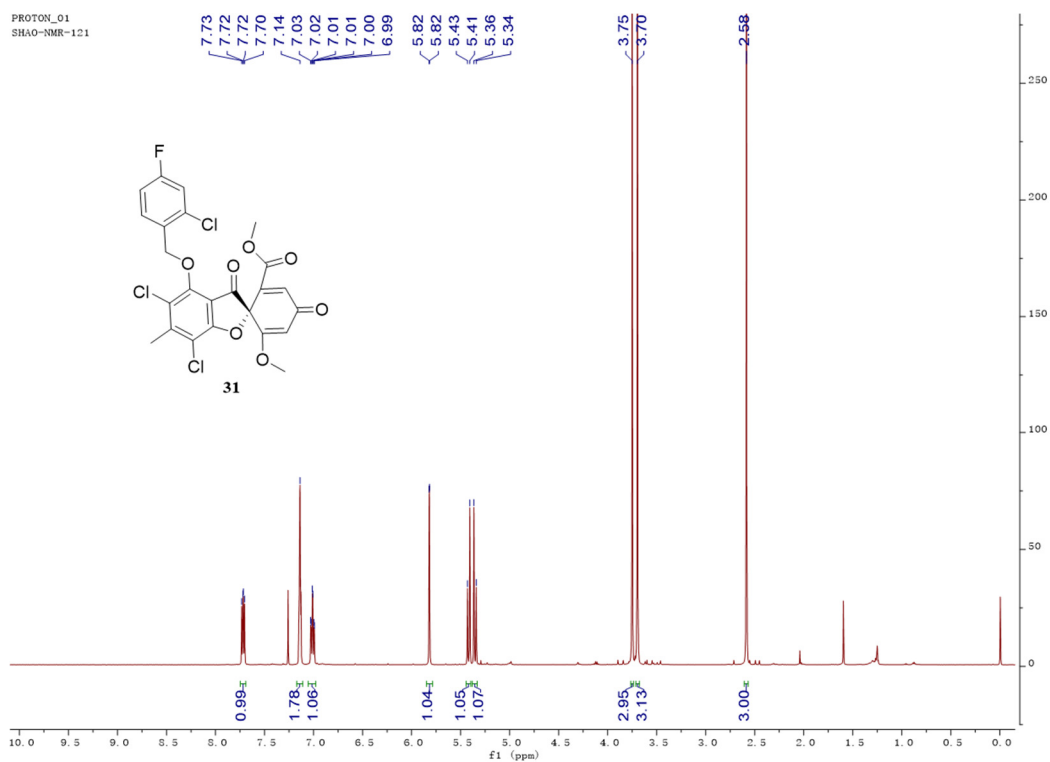

**Figure S91.**  $^1\text{H}$  NMR (500 MHz,  $\text{CDCl}_3$ ) spectrum of compound **31**

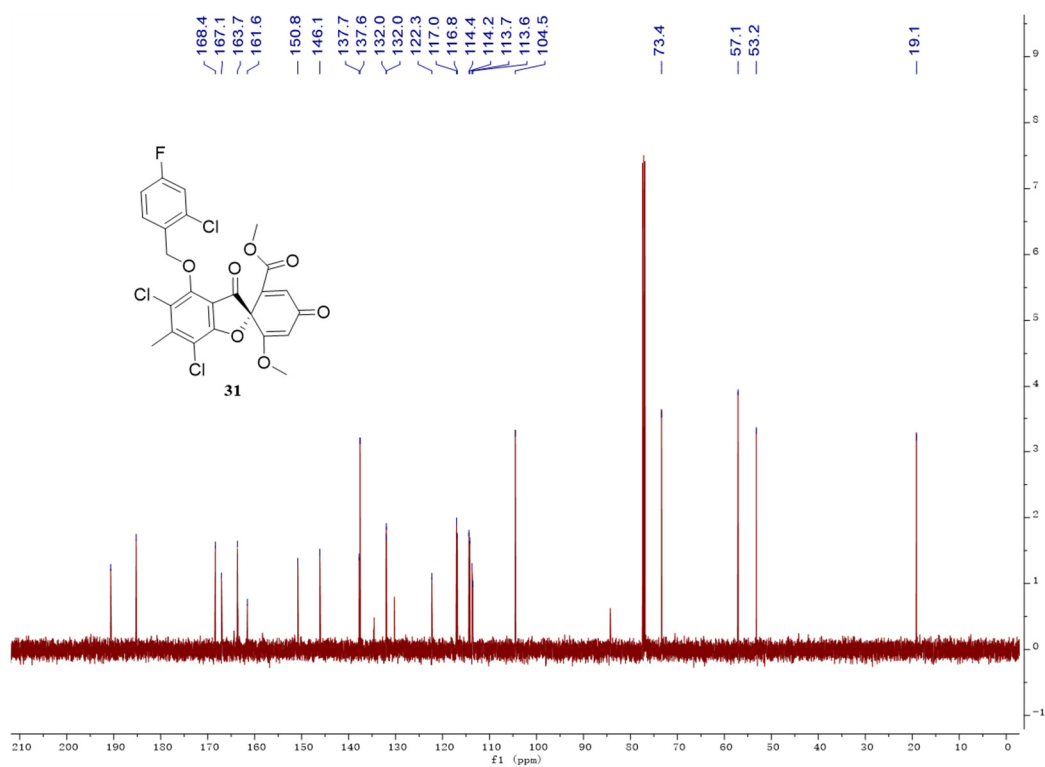

**Figure S92.**  $^{13}\text{C}$  NMR (125 MHz,  $\text{CDCl}_3$ ) spectrum of compound **31**

CHNQD-02102 #530 RT: 5.10 AV: 1 NL: 3.02E7  
T: FTMS -p ESI Full ms [100.00-1500.00]

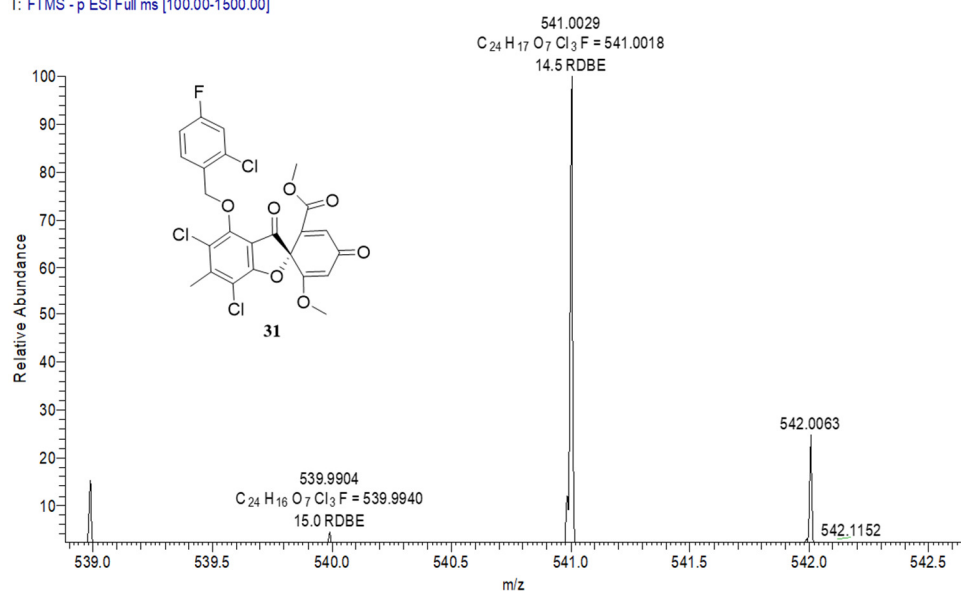

Figure S93. HRESIMS spectrum of compound 31

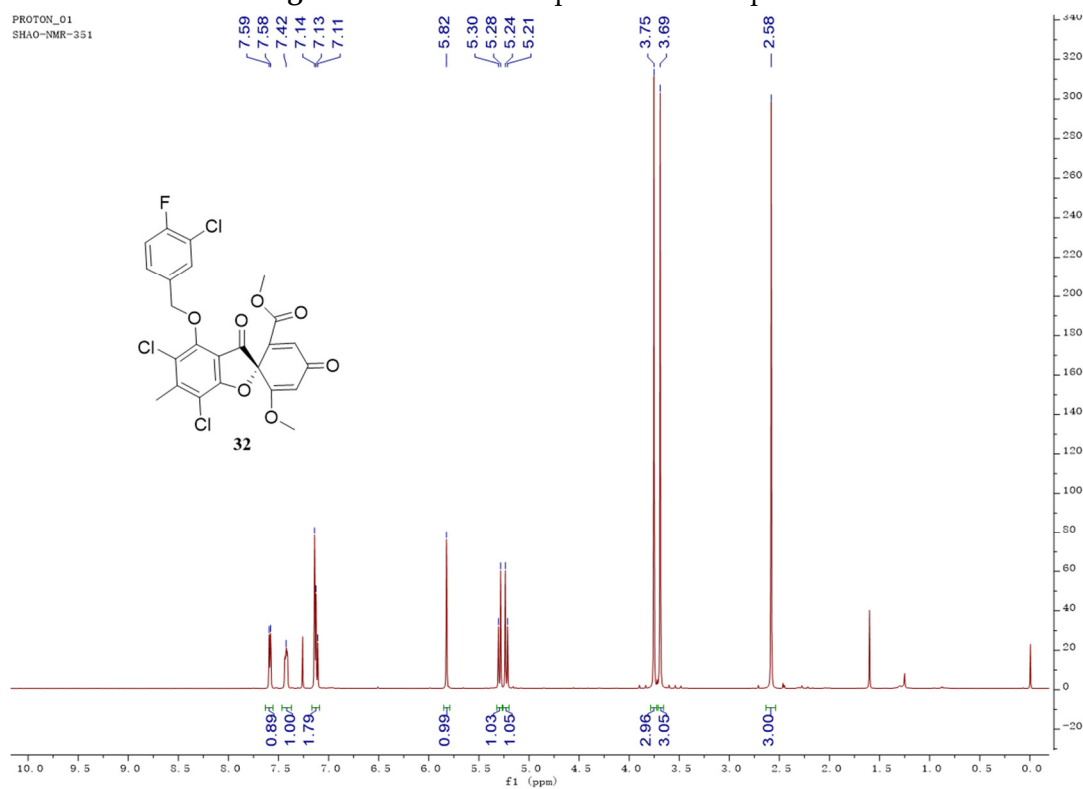

Figure S94. <sup>1</sup>H NMR (500 MHz, CDCl<sub>3</sub>) spectrum of compound 32

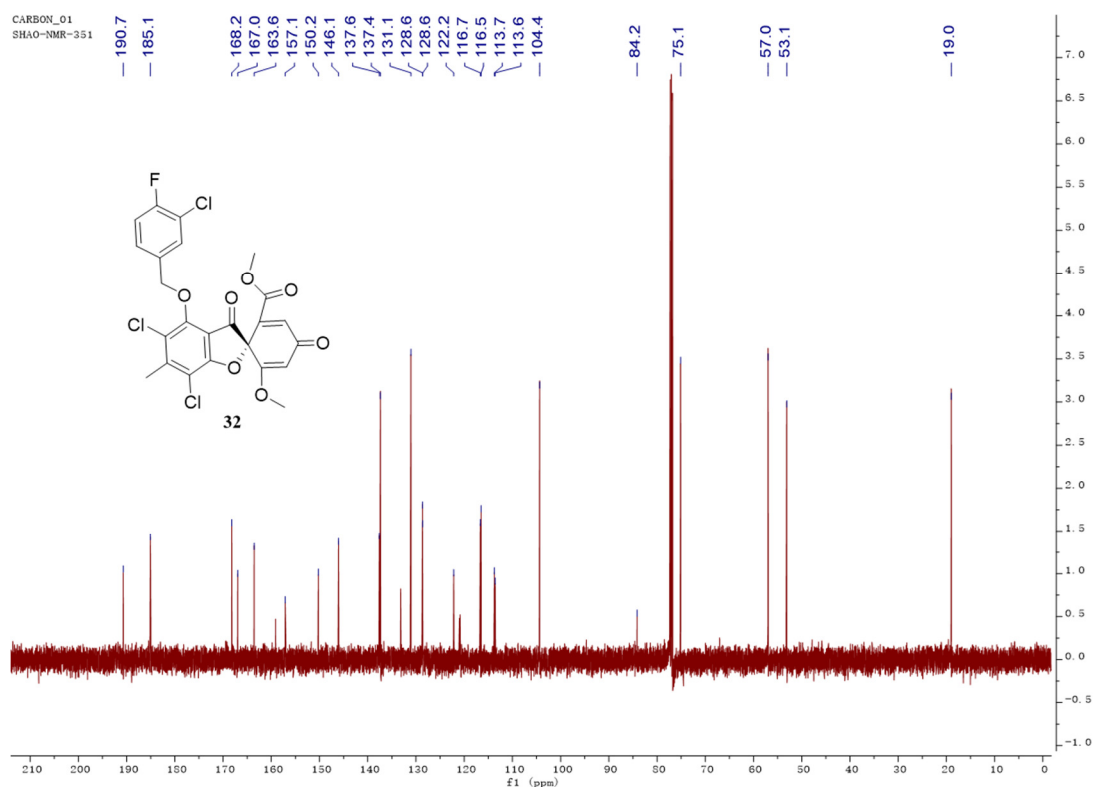

**Figure S95.**  $^{13}\text{C}$  NMR (125 MHz,  $\text{CDCl}_3$ ) spectrum of compound 32

CHNQD-02107 #516 RT: 4.97 AV: 1 NL: 2.89E8  
T: FTMS - p ESI Full ms [100.00-1500.00]

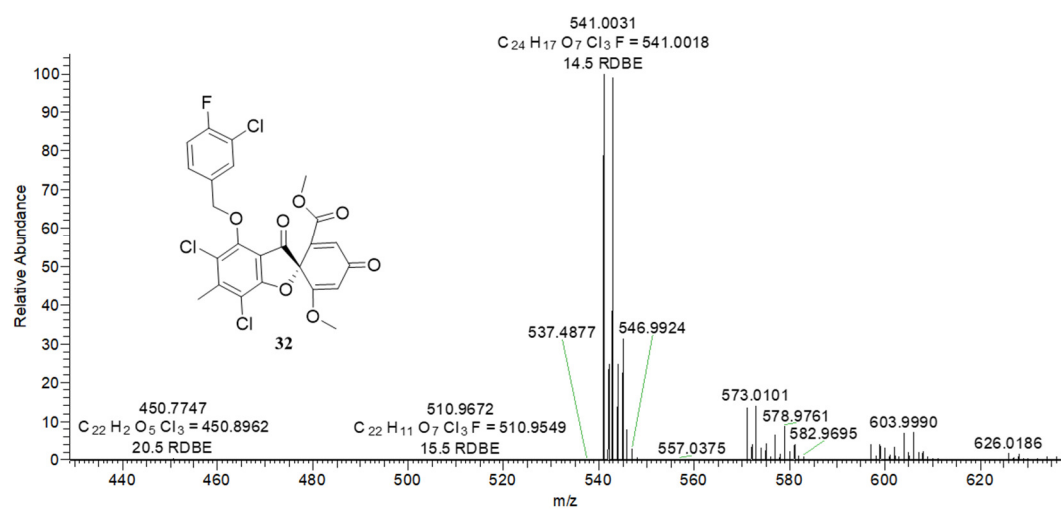

**Figure S96.** HRESIMS spectrum of compound 32



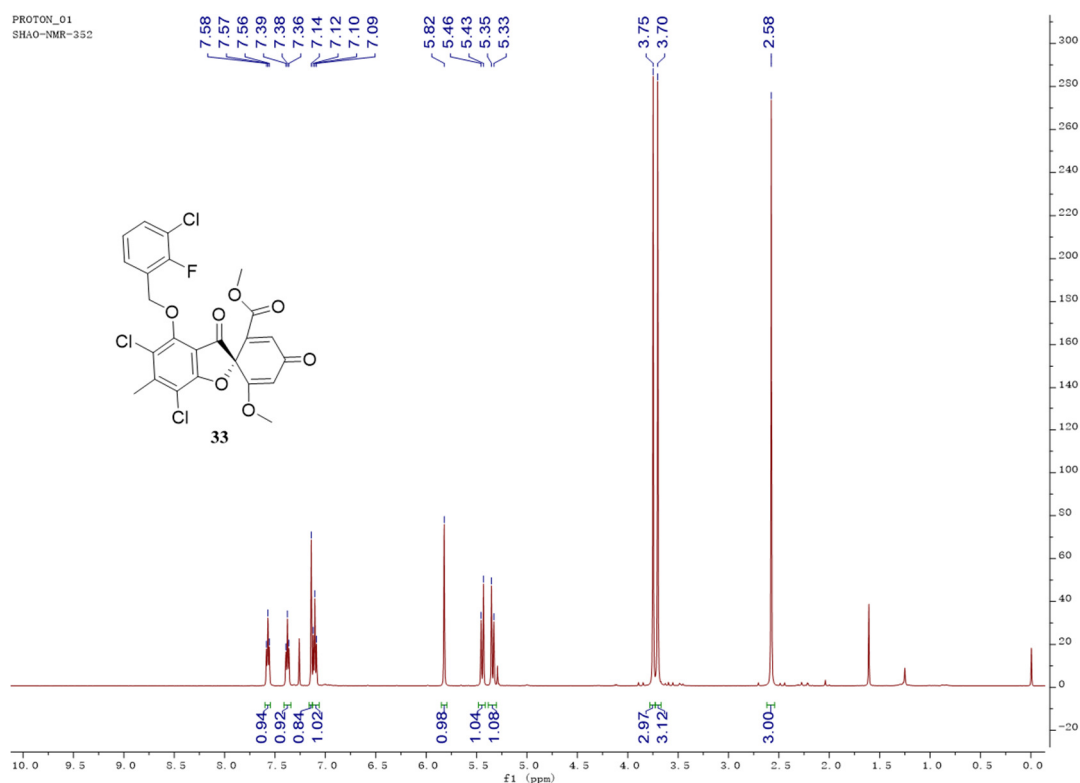

**Figure S97.**  $^1\text{H}$  NMR (500 MHz,  $\text{CDCl}_3$ ) spectrum of compound 33

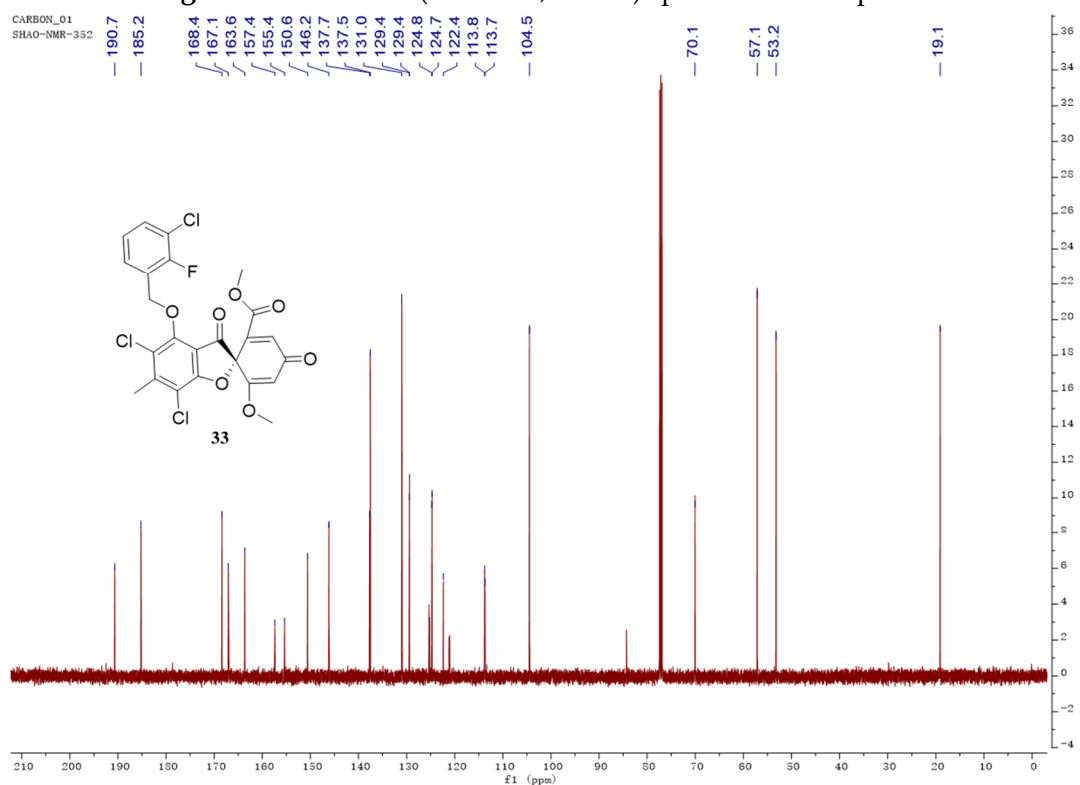

**Figure S98.**  $^{13}\text{C}$  NMR (125 MHz,  $\text{CDCl}_3$ ) spectrum of compound 33

CHNQD-02108 #527 RT: 5.08 AV: 1 NL: 7.06E8  
T: FTMS + p ESI Full ms [100.00-1500.00]

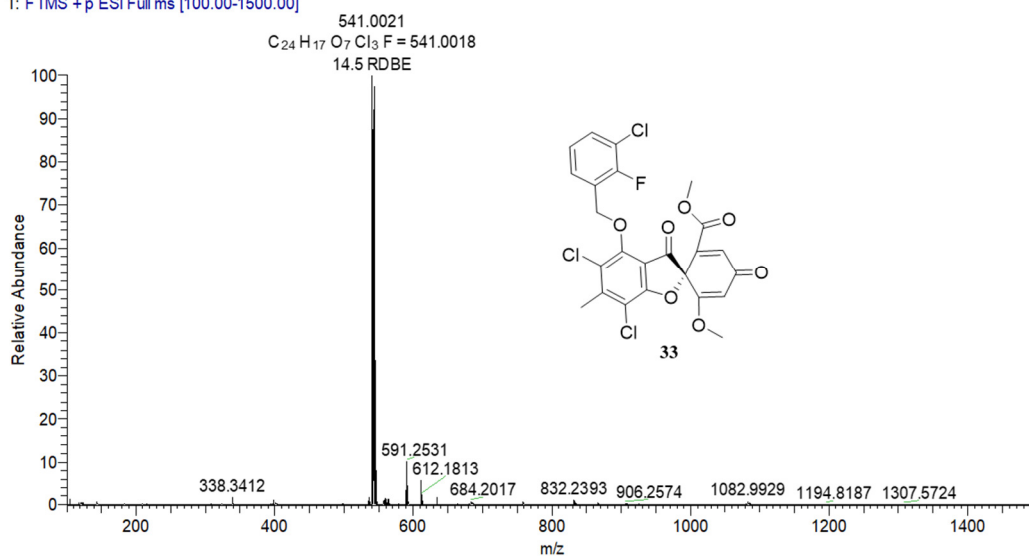

Figure S99. HRESIMS spectrum of compound 33

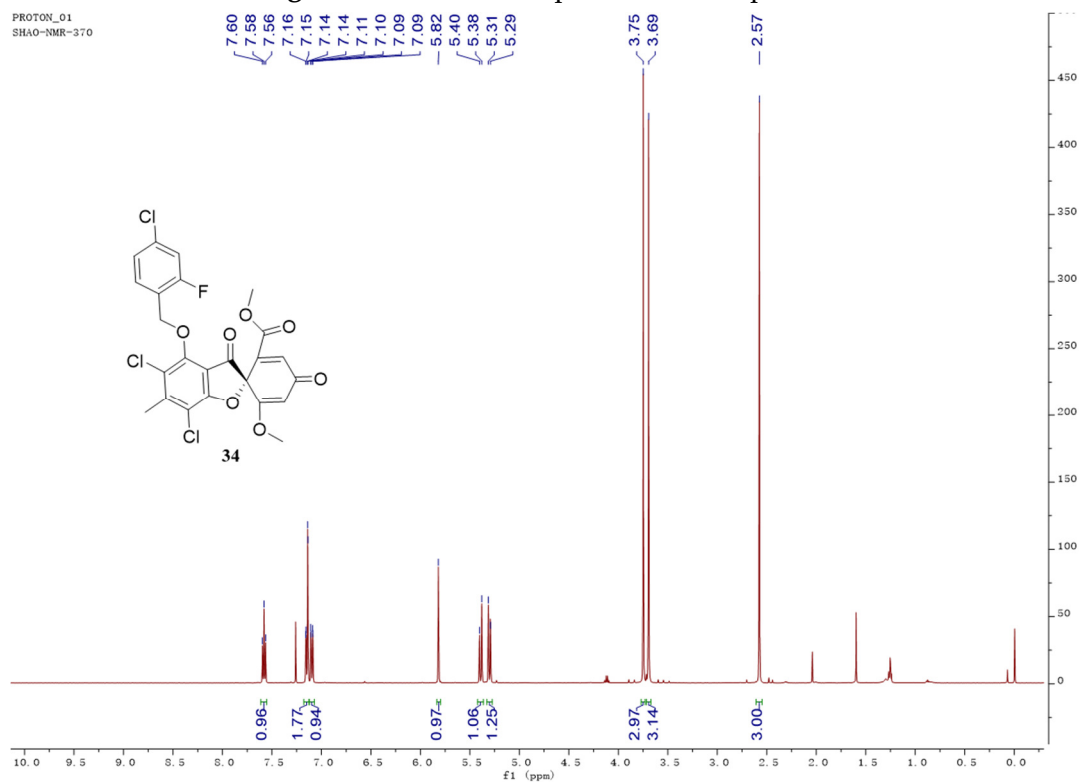

Figure S100. <sup>1</sup>H NMR (500 MHz, CDCl<sub>3</sub>) spectrum of compound 34

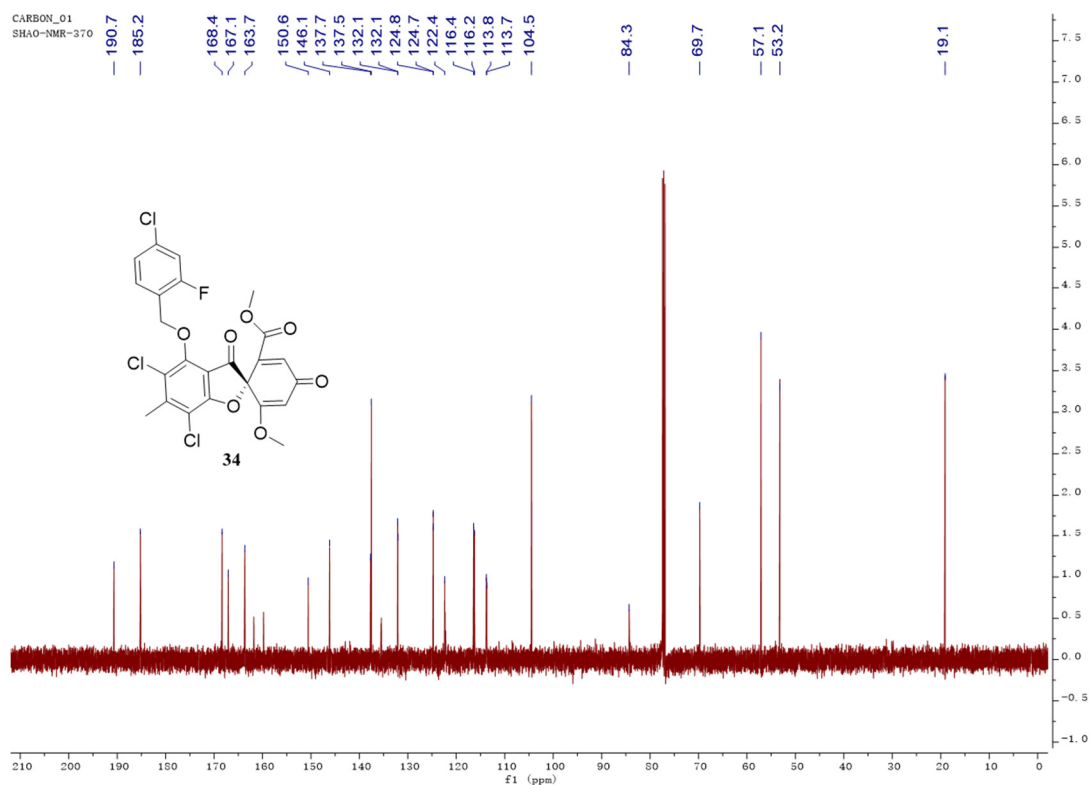

**Figure S101.**  $^{13}\text{C}$  NMR (125 MHz,  $\text{CDCl}_3$ ) spectrum of compound **34**

CHNQD-02122 #533 RT: 5.14 AV: 1 NL: 6.38E8

T: FTMS + p ESI Full ms [100.00-1500.00]

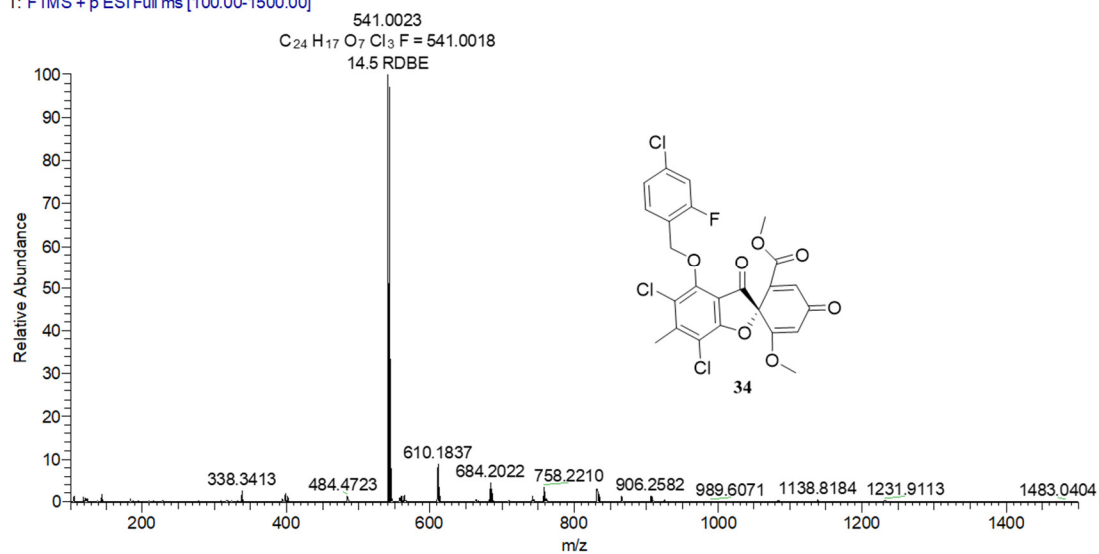

**Figure S102.** HRESIMS spectrum of compound **34**

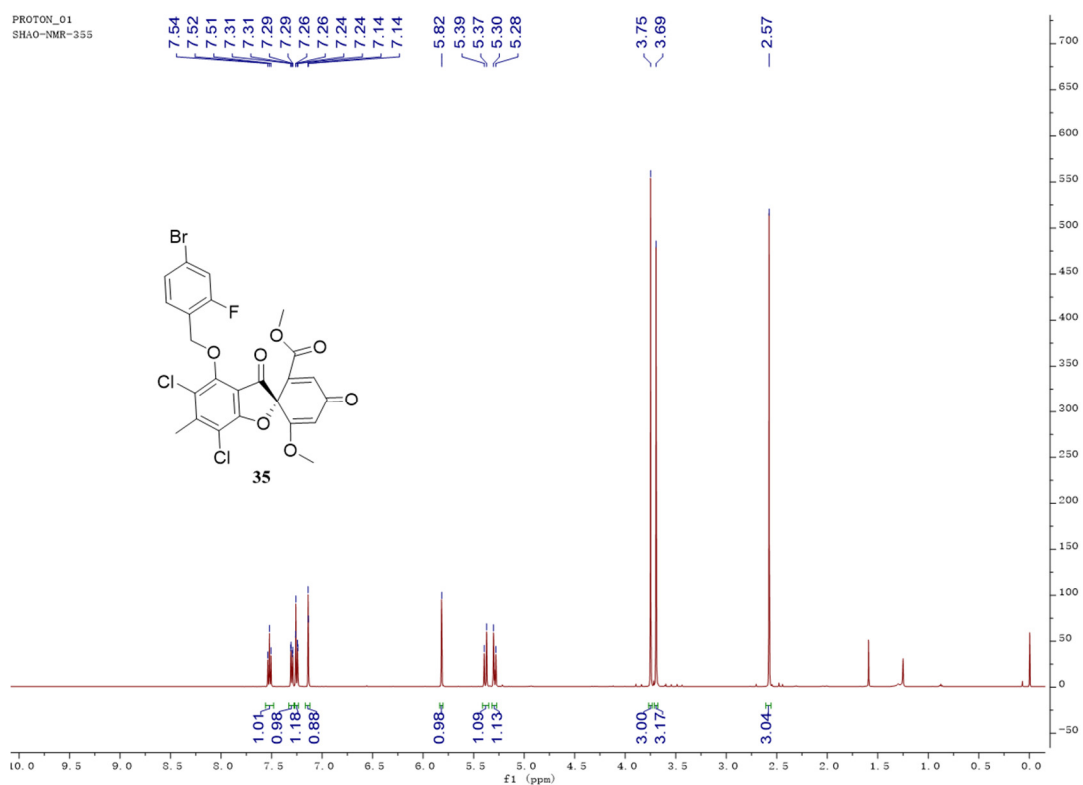

Figure S103.  $^1\text{H}$  NMR (500 MHz,  $\text{CDCl}_3$ ) spectrum of compound 35

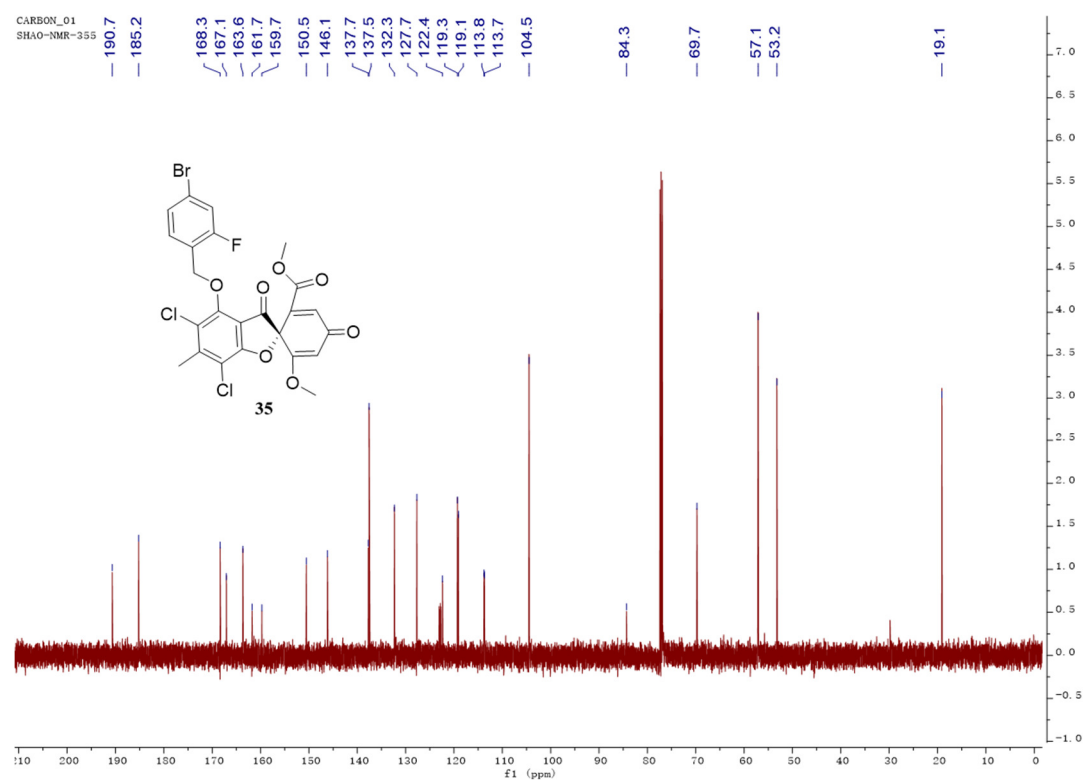

Figure S104.  $^{13}\text{C}$  NMR (125 MHz,  $\text{CDCl}_3$ ) spectrum of compound 35

CHNQD-02111 #1-622 RT: 0.00-5.99 AV: 622 NL: 4.79E6  
T: FTMS + p ESIFull.ms [100.00-1500.00]

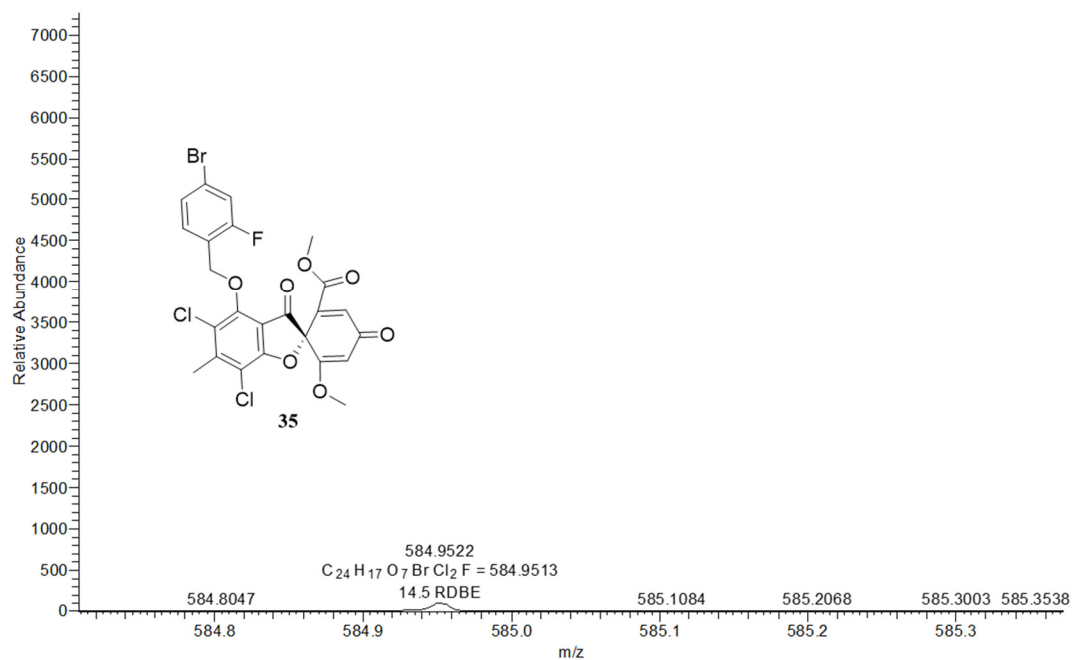

**Figure S105.** HRESIMS spectrum of compound **35**

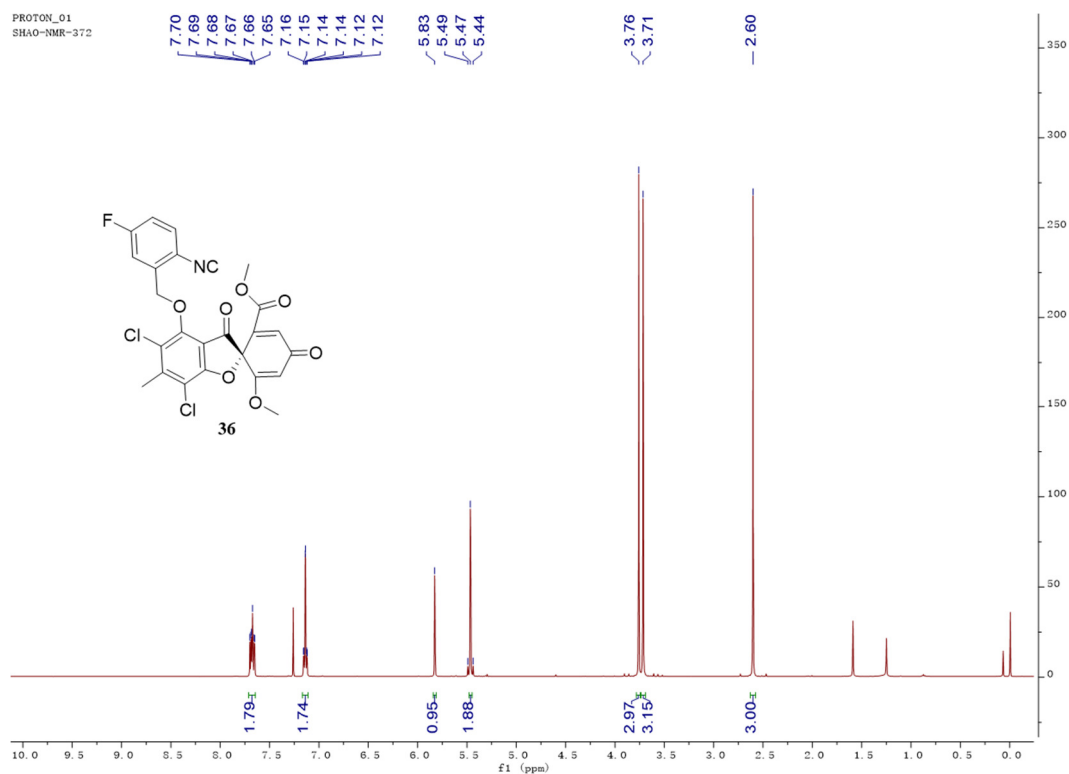

**Figure S106.**  $^1H$  NMR (500 MHz,  $CDCl_3$ ) spectrum of compound **36**

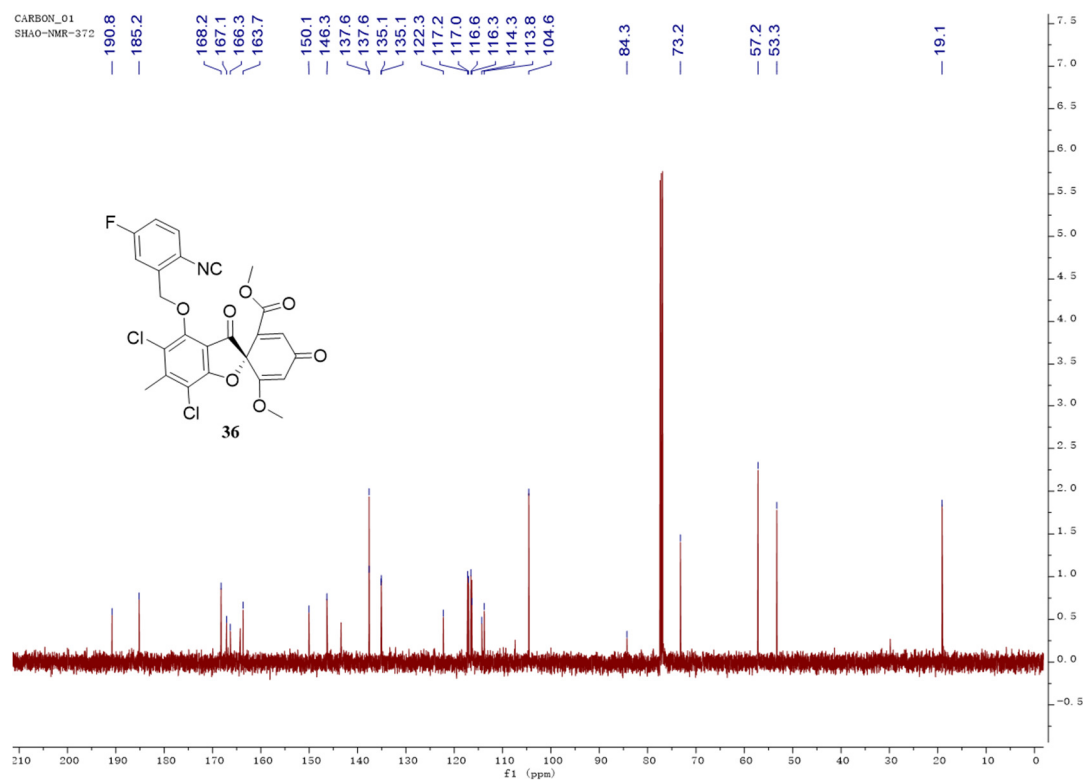

CHNQD-02124 #505 RT: 4.87 AV: 1 NL: 2.53E7  
T: FTMS + p ESI Full ms [100.00-1500.00]

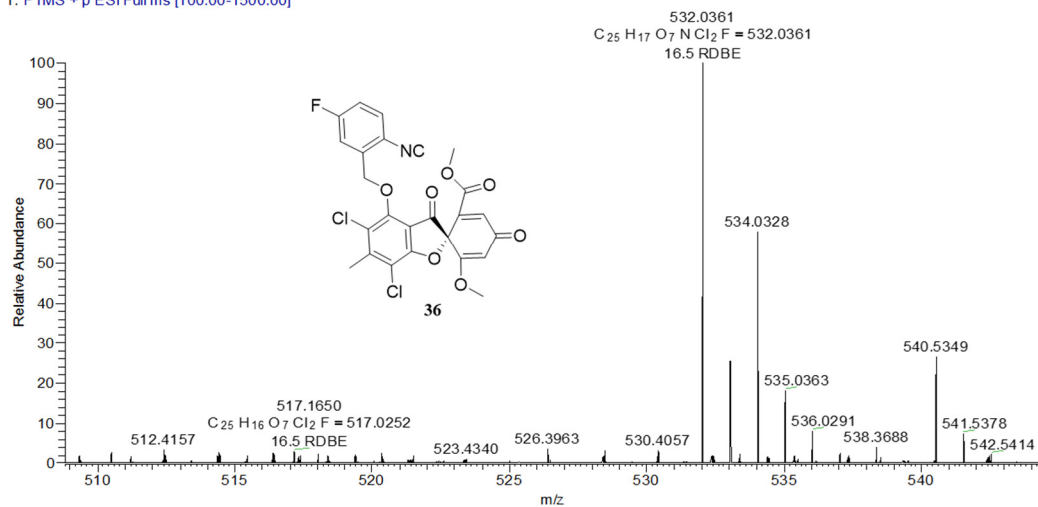

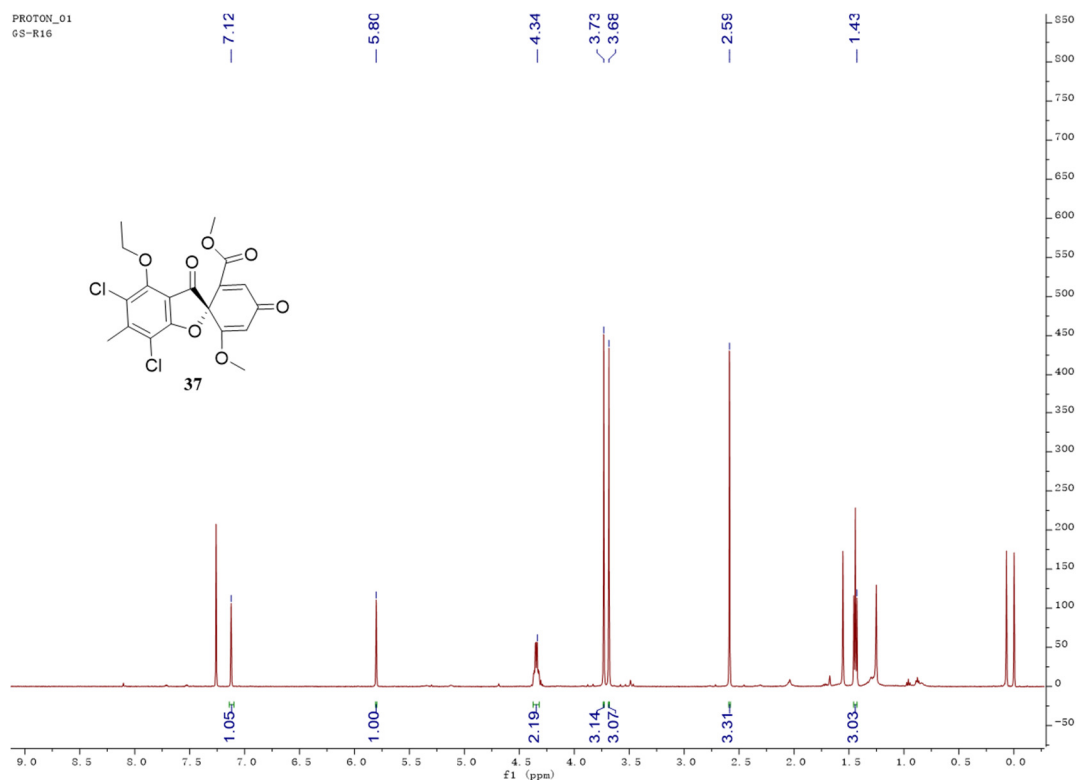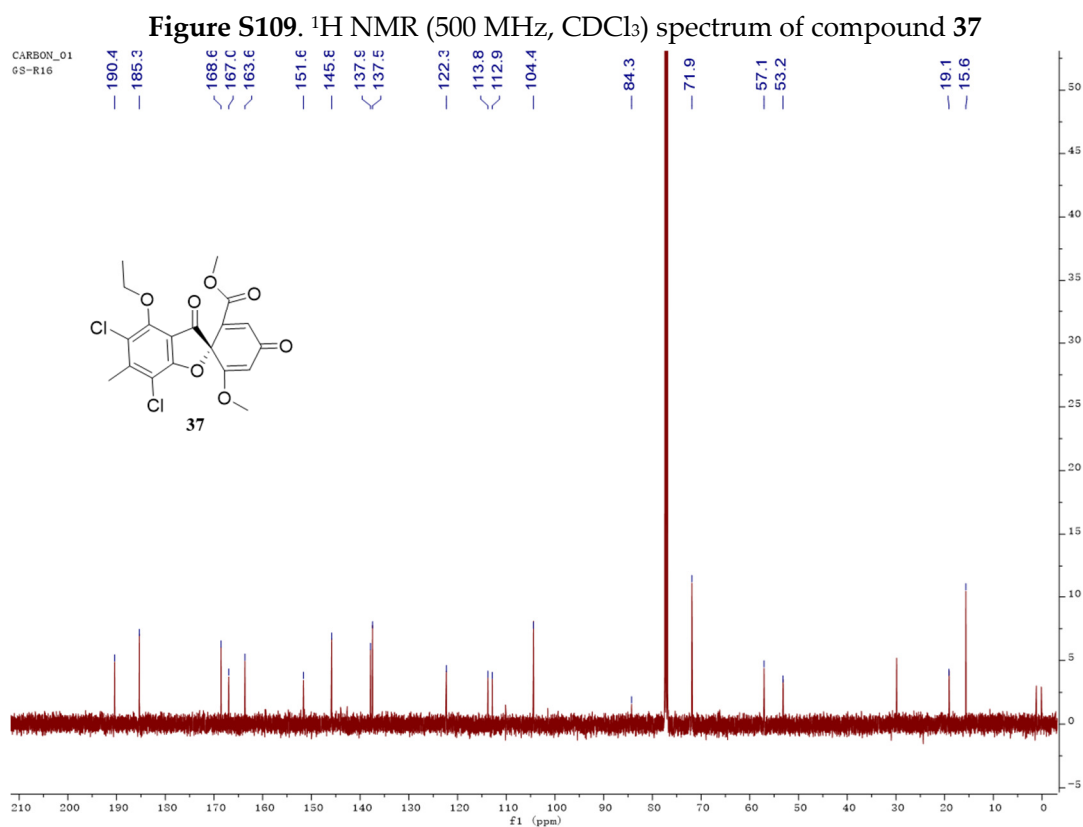

CHNQD-02144 #475 RT: 4.61 AV: 1 NL: 6.01E8  
T: FTMS + p ESI Full ms [100.00-1500.00]

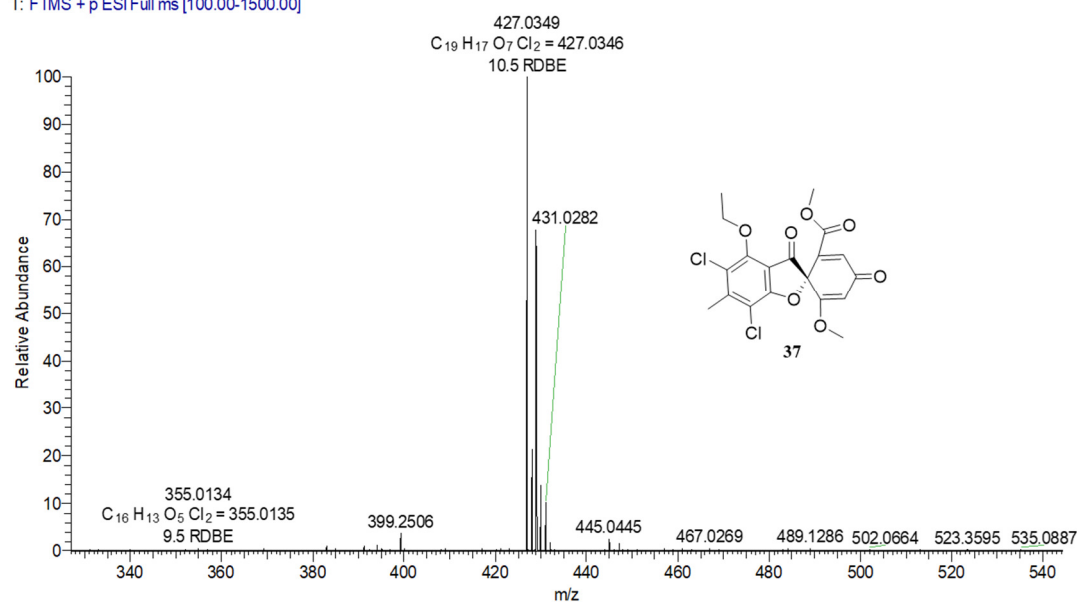

**Figure S111.** HRESIMS spectrum of compound **37**

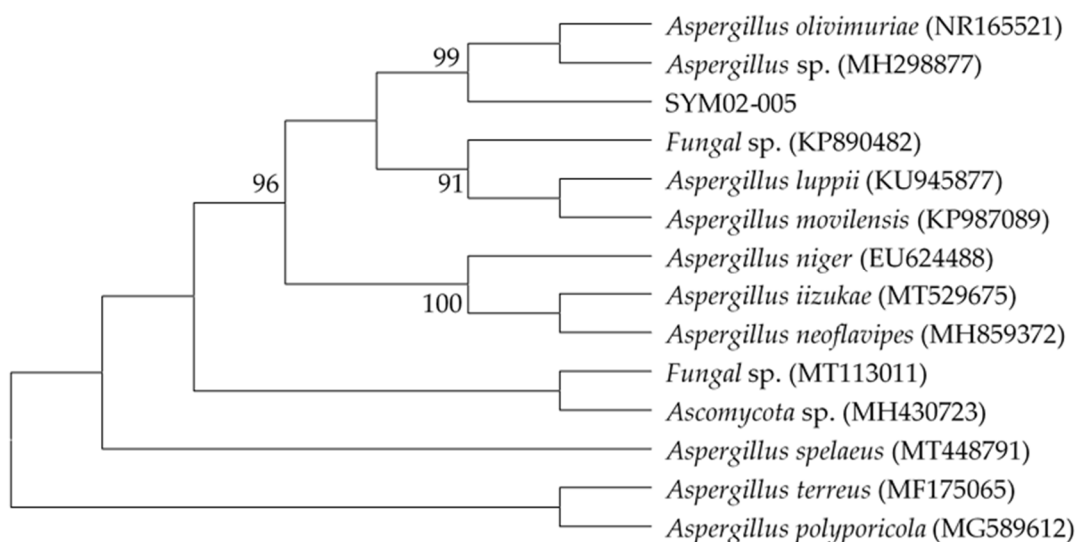

**Figure S112.** Neighbor-joining phylogenetic tree based on ITS sequences of cultured fungi associated with the fungus SYM02-005. The values at each node represent the bootstrap values from 1,000 replicates, and the scale bar=0.05 substitutions per nucleo.
